# Supplementary material for: The conserved genetic program of male germ cells uncovers ancient regulators of human spermatogenesis
Source: bioRxiv preprint, doi:10.1101/2022.03.02.482557, version 4 (2024-06-03)
Supplement: Sup. Table 2 [file 482557_file03.xlsx]

## Sheet: Human
id	gene	TPM
ENSG00000115977	AAK1	10.0345
ENSG00000131043	AAR2	10.2227
ENSG00000090861	AARS	5.85304
ENSG00000157426	AASDH	1.49659
ENSG00000149313	AASDHPPT	3.15003
ENSG00000115657	ABCB6	9.80093
ENSG00000197150	ABCB8	2.61421
ENSG00000150967	ABCB9	7.80039
ENSG00000164163	ABCE1	5.9193
ENSG00000033050	ABCF2	7.6831
ENSG00000204427	ABHD16A	1.64453
ENSG00000107362	ABHD17B	4.39535
ENSG00000158201	ABHD3	1.19302
ENSG00000100439	ABHD4	11.988
ENSG00000011198	ABHD5	2.02586
ENSG00000136754	ABI1	3.48209
ENSG00000138443	ABI2	15.5841
ENSG00000097007	ABL1	3.12819
ENSG00000143322	ABL2	2.21754
ENSG00000146109	ABT1	1.62274
ENSG00000089009	AC004086.1	33.8192
ENSG00000070423	AC004156.1	15.9471
ENSG00000105705	AC004475.1	11.8258
ENSG00000276345	AC004556.1	1.92994
ENSG00000258311	AC009779.3	2.26291
ENSG00000130313	AC010618.1	11.4964
ENSG00000255730	AC011462.1	1.49574
ENSG00000257390	AC023055.1	2.61683
ENSG00000272617	AC026464.6	6.35589
ENSG00000137807	AC027237.1	12.6104
ENSG00000111540	AC034102.1	15.6212
ENSG00000275740	AC091959.3	1.84117
ENSG00000249773	AC092647.5	3.70006
ENSG00000111596	AC092881.1	11.9641
ENSG00000267561	AC093155.3	1.43325
ENSG00000267645	AC105052.3	2.24041
ENSG00000258130	AC106782.1	4.92048
ENSG00000258150	AC133555.3	4.24987
ENSG00000167315	ACAA2	4.49452
ENSG00000278540	ACACA	2.90791
ENSG00000076555	ACACB	1.74157
ENSG00000177646	ACAD9	7.08656
ENSG00000117054	ACADM	11.2391
ENSG00000122971	ACADS	4.39811
ENSG00000196177	ACADSB	2.90501
ENSG00000072778	ACADVL	89.7502
ENSG00000075239	ACAT1	42.2787
ENSG00000120437	ACAT2	2.7246
ENSG00000230124	ACBD6	11.907
ENSG00000177076	ACER2	3.62054
ENSG00000100813	ACIN1	28.5954
ENSG00000131473	ACLY	6.46819
ENSG00000122729	ACO1	2.27599
ENSG00000100412	ACO2	7.04567
ENSG00000112304	ACOT13	10.6429
ENSG00000161533	ACOX1	2.72884
ENSG00000168306	ACOX2	1.50473
ENSG00000134940	ACRV1	18.6709
ENSG00000176715	ACSF3	3.27337
ENSG00000107796	ACTA2	5.54444
ENSG00000184009	ACTG1	120.745
ENSG00000136518	ACTL6A	24.7947
ENSG00000072110	ACTN1	3.38828
ENSG00000130402	ACTN4	2.3889
ENSG00000131966	ACTR10	5.49646
ENSG00000138107	ACTR1A	20.881
ENSG00000115073	ACTR1B	3.36172
ENSG00000138071	ACTR2	5.35717
ENSG00000115091	ACTR3	11.5603
ENSG00000133627	ACTR3B	3.15013
ENSG00000101442	ACTR5	9.02067
ENSG00000113812	ACTR8	2.47326
ENSG00000135503	ACVR1B	2.90299
ENSG00000119640	ACYP1	23.6193
ENSG00000168803	ADAL	6.74352
ENSG00000137845	ADAM10	5.48077
ENSG00000151694	ADAM17	4.35982
ENSG00000178031	ADAMTSL1	2.45872
ENSG00000156218	ADAMTSL3	2.00363
ENSG00000197381	ADARB1	2.01544
ENSG00000185736	ADARB2	3.86902
ENSG00000173137	ADCK5	2.20029
ENSG00000197894	ADH5	6.31781
ENSG00000182551	ADI1	1.0045
ENSG00000156110	ADK	3.89684
ENSG00000181915	ADO	12.1392
ENSG00000159322	ADPGK	8.31502
ENSG00000130706	ADRM1	23.9499
ENSG00000239900	ADSL	2.69979
ENSG00000035687	ADSS	19.2597
ENSG00000185100	ADSSL1	10.5461
ENSG00000072364	AFF4	11.9257
ENSG00000135537	AFG1L	4.53885
ENSG00000141385	AFG3L2	3.84517
ENSG00000119844	AFTPH	9.50523
ENSG00000006530	AGK	1.73486
ENSG00000162688	AGL	1.60193
ENSG00000092847	AGO1	2.32654
ENSG00000123908	AGO2	1.46675
ENSG00000134698	AGO4	7.46925
ENSG00000160216	AGPAT3	10.2269
ENSG00000026652	AGPAT4	4.77753
ENSG00000018510	AGPS	5.05137
ENSG00000135049	AGTPBP1	6.21776
ENSG00000101444	AHCY	25.7853
ENSG00000164022	AIMP1	5.0389
ENSG00000106305	AIMP2	16.9191
ENSG00000110711	AIP	4.52811
ENSG00000106992	AK1	7.54527
ENSG00000004455	AK2	31.3871
ENSG00000121057	AKAP1	18.2422
ENSG00000127914	AKAP9	4.56677
ENSG00000117448	AKR1A1	2.13793
ENSG00000085662	AKR1B1	6.48517
ENSG00000142208	AKT1	1.43102
ENSG00000105221	AKT2	20.424
ENSG00000117020	AKT3	6.76302
ENSG00000166971	AKTIP	6.89079
ENSG00000239665	AL157392.3	16.8962
ENSG00000279392	AL158801.5	7.39847
ENSG00000278139	AL358075.4	7.28959
ENSG00000148218	ALAD	5.86891
ENSG00000023330	ALAS1	6.90101
ENSG00000137124	ALDH1B1	1.24957
ENSG00000072210	ALDH3A2	4.15315
ENSG00000119711	ALDH6A1	1.87089
ENSG00000164904	ALDH7A1	1.08109
ENSG00000149925	ALDOA	9.81971
ENSG00000109107	ALDOC	2.34809
ENSG00000033011	ALG1	3.23772
ENSG00000139133	ALG10	1.6297
ENSG00000253710	ALG11	1.9586
ENSG00000119523	ALG2	2.12252
ENSG00000214160	ALG3	30.7357
ENSG00000120697	ALG5	6.0301
ENSG00000159063	ALG8	79.6971
ENSG00000239382	ALKBH6	1.62318
ENSG00000125652	ALKBH7	192.913
ENSG00000137760	ALKBH8	1.04633
ENSG00000003393	ALS2	2.58237
ENSG00000123505	AMD1	6.6303
ENSG00000162066	AMDHD2	12.2811
ENSG00000144233	AMMECR1L	4.34175
ENSG00000153107	ANAPC1	4.46683
ENSG00000164162	ANAPC10	8.55428
ENSG00000141552	ANAPC11	102.52
ENSG00000176248	ANAPC2	2.22467
ENSG00000053900	ANAPC4	3.35378
ENSG00000089053	ANAPC5	10.0816
ENSG00000013523	ANGEL1	32.7409
ENSG00000174606	ANGEL2	2.36064
ENSG00000145362	ANK2	5.92149
ENSG00000151150	ANK3	4.89734
ENSG00000176915	ANKLE2	25.3307
ENSG00000106524	ANKMY2	3.32134
ENSG00000164331	ANKRA2	10.9567
ENSG00000101745	ANKRD12	9.66013
ENSG00000151458	ANKRD50	7.18866
ENSG00000100124	ANKRD54	16.1816
ENSG00000064999	ANKS1A	7.14603
ENSG00000185046	ANKS1B	12.3787
ENSG00000138279	ANXA7	3.23497
ENSG00000100280	AP1B1	15.5073
ENSG00000166747	AP1G1	23.5948
ENSG00000072958	AP1M1	8.2902
ENSG00000129354	AP1M2	1.99692
ENSG00000182287	AP1S2	1.05955
ENSG00000196961	AP2A1	14.1438
ENSG00000183020	AP2A2	3.44428
ENSG00000006125	AP2B1	61.0961
ENSG00000161203	AP2M1	26.8273
ENSG00000042753	AP2S1	17.0733
ENSG00000132842	AP3B1	4.44235
ENSG00000065000	AP3D1	10.1435
ENSG00000185009	AP3M1	8.20236
ENSG00000070718	AP3M2	6.50383
ENSG00000177879	AP3S1	4.66901
ENSG00000157823	AP3S2	10.6279
ENSG00000134982	APC	4.83886
ENSG00000100823	APEX1	7.02696
ENSG00000138613	APH1B	84.3182
ENSG00000166181	API5	7.02174
ENSG00000149089	APIP	2.24017
ENSG00000169621	APLF	2.03298
ENSG00000101474	APMAP	17.7702
ENSG00000198931	APRT	11.0561
ENSG00000021776	AQR	6.77827
ENSG00000078061	ARAF	1.30806
ENSG00000095139	ARCN1	18.887
ENSG00000119682	AREL1	9.41381
ENSG00000143761	ARF1	208.674
ENSG00000134287	ARF3	6.40853
ENSG00000168374	ARF4	11.553
ENSG00000004059	ARF5	8.51516
ENSG00000165527	ARF6	4.09935
ENSG00000101199	ARFGAP1	5.92594
ENSG00000242247	ARFGAP3	14.8563
ENSG00000066777	ARFGEF1	16.0875
ENSG00000132254	ARFIP2	3.86172
ENSG00000101246	ARFRP1	2.86944
ENSG00000071205	ARHGAP10	1.38493
ENSG00000146376	ARHGAP18	2.03872
ENSG00000213390	ARHGAP19	11.4044
ENSG00000107863	ARHGAP21	8.76263
ENSG00000275832	ARHGAP23	4.5872
ENSG00000088756	ARHGAP28	10.8075
ENSG00000160007	ARHGAP35	25.4665
ENSG00000165895	ARHGAP42	1.62677
ENSG00000100852	ARHGAP5	20.7188
ENSG00000141522	ARHGDIA	8.7848
ENSG00000104728	ARHGEF10	4.2179
ENSG00000074964	ARHGEF10L	1.83882
ENSG00000132694	ARHGEF11	15.5441
ENSG00000196914	ARHGEF12	4.48774
ENSG00000102606	ARHGEF7	8.7083
ENSG00000117713	ARID1A	24.4639
ENSG00000049618	ARID1B	5.64178
ENSG00000189079	ARID2	32.8769
ENSG00000166233	ARIH1	5.57497
ENSG00000177479	ARIH2	26.3396
ENSG00000120805	ARL1	8.9285
ENSG00000152219	ARL14EP	11.9128
ENSG00000185829	ARL17A	2.66716
ENSG00000228696	ARL17B	1.98194
ENSG00000213465	ARL2	37.7498
ENSG00000138175	ARL3	9.16784
ENSG00000162980	ARL5A	2.58461
ENSG00000165997	ARL5B	1.66011
ENSG00000170540	ARL6IP1	57.967
ENSG00000144746	ARL6IP5	4.22785
ENSG00000165309	ARMC3	17.5837
ENSG00000169126	ARMC4	17.3806
ENSG00000105676	ARMC6	4.82531
ENSG00000120029	ARMH3	4.24272
ENSG00000143437	ARNT	9.06597
ENSG00000133794	ARNTL	5.8992
ENSG00000241685	ARPC1A	24.2206
ENSG00000130429	ARPC1B	1.41886
ENSG00000163466	ARPC2	64.0185
ENSG00000111229	ARPC3	21.228
ENSG00000241553	ARPC4	8.69276
ENSG00000162704	ARPC5	3.71424
ENSG00000136950	ARPC5L	23.2939
ENSG00000128989	ARPP19	15.0127
ENSG00000173409	ARV1	37.1615
ENSG00000153317	ASAP1	20.104
ENSG00000151693	ASAP2	24.7077
ENSG00000138303	ASCC1	6.22731
ENSG00000100325	ASCC2	25.6698
ENSG00000112249	ASCC3	10.8702
ENSG00000111875	ASF1A	2.41274
ENSG00000105011	ASF1B	26.7612
ENSG00000116539	ASH1L	14.7566
ENSG00000129691	ASH2L	20.4857
ENSG00000198356	ASNA1	5.21926
ENSG00000070669	ASNS	5.53709
ENSG00000198363	ASPH	1.77813
ENSG00000169696	ASPSCR1	12.9225
ENSG00000130707	ASS1	2.66744
ENSG00000143970	ASXL2	9.51462
ENSG00000154438	ASZ1	4.54978
ENSG00000107669	ATE1	3.69669
ENSG00000171681	ATF7IP	16.0426
ENSG00000123395	ATG101	9.0448
ENSG00000145782	ATG12	5.17661
ENSG00000175224	ATG13	45.0724
ENSG00000126775	ATG14	5.75307
ENSG00000085978	ATG16L1	1.14049
ENSG00000110046	ATG2A	2.64116
ENSG00000066739	ATG2B	16.1136
ENSG00000144848	ATG3	23.5535
ENSG00000101844	ATG4A	1.00856
ENSG00000168397	ATG4B	12.1634
ENSG00000125703	ATG4C	1.37891
ENSG00000130734	ATG4D	24.4836
ENSG00000197548	ATG7	15.0582
ENSG00000198925	ATG9A	31.0011
ENSG00000138363	ATIC	5.97394
ENSG00000198513	ATL1	4.36826
ENSG00000149311	ATM	8.13636
ENSG00000166454	ATMIN	19.9234
ENSG00000206190	ATP10A	1.51126
ENSG00000105726	ATP13A1	9.07614
ENSG00000070961	ATP2B1	1.59074
ENSG00000058668	ATP2B4	11.5648
ENSG00000017260	ATP2C1	4.01761
ENSG00000152234	ATP5F1A	17.2115
ENSG00000110955	ATP5F1B	128.467
ENSG00000165629	ATP5F1C	22.0789
ENSG00000099624	ATP5F1D	30.2626
ENSG00000159199	ATP5MC1	18.6265
ENSG00000241468	ATP5MF	125.394
ENSG00000116459	ATP5PB	27.9756
ENSG00000167863	ATP5PD	19.1396
ENSG00000154723	ATP5PF	59.6197
ENSG00000241837	ATP5PO	60.0913
ENSG00000071553	ATP6AP1	3.22013
ENSG00000182220	ATP6AP2	1.84118
ENSG00000185883	ATP6V0C	42.0437
ENSG00000159720	ATP6V0D1	45.2311
ENSG00000114573	ATP6V1A	6.41821
ENSG00000147416	ATP6V1B2	28.4047
ENSG00000155097	ATP6V1C1	2.5023
ENSG00000100554	ATP6V1D	9.22186
ENSG00000131100	ATP6V1E1	12.199
ENSG00000128524	ATP6V1F	132.949
ENSG00000136888	ATP6V1G1	18.9609
ENSG00000047249	ATP6V1H	11.056
ENSG00000132932	ATP8A2	5.66163
ENSG00000143515	ATP8B2	1.71697
ENSG00000054793	ATP9A	3.73282
ENSG00000166377	ATP9B	14.2386
ENSG00000123472	ATPAF1	11.2599
ENSG00000171953	ATPAF2	16.1298
ENSG00000088812	ATRN	6.51816
ENSG00000085224	ATRX	4.1837
ENSG00000204842	ATXN2	29.7399
ENSG00000168488	ATXN2L	112.184
ENSG00000146776	ATXN7L1	12.9141
ENSG00000087152	ATXN7L3	7.63716
ENSG00000148090	AUH	2.64154
ENSG00000149541	B3GAT3	1.7021
ENSG00000086062	B4GALT1	12.8276
ENSG00000108641	B9D1	27.2083
ENSG00000204463	BAG6	10.6624
ENSG00000175334	BANF1	35.4398
ENSG00000163930	BAP1	23.7583
ENSG00000198604	BAZ1A	31.5719
ENSG00000076108	BAZ2A	37.5368
ENSG00000185825	BCAP31	11.177
ENSG00000116752	BCAS2	4.04864
ENSG00000141376	BCAS3	22.0192
ENSG00000107949	BCCIP	10.4746
ENSG00000248098	BCKDHA	16.1713
ENSG00000083123	BCKDHB	2.68037
ENSG00000145734	BDP1	2.53206
ENSG00000126581	BECN1	5.02008
ENSG00000185963	BICD2	1.61541
ENSG00000135127	BICDL1	11.6846
ENSG00000166619	BLCAP	7.20451
ENSG00000197299	BLM	3.21599
ENSG00000108578	BLMH	4.89147
ENSG00000135441	BLOC1S1	13.9869
ENSG00000196072	BLOC1S2	4.92868
ENSG00000117475	BLZF1	17.8448
ENSG00000168283	BMI1	5.5241
ENSG00000138756	BMP2K	27.0279
ENSG00000165733	BMS1	2.67902
ENSG00000113734	BNIP1	17.4775
ENSG00000176171	BNIP3	3.62902
ENSG00000178096	BOLA1	3.06389
ENSG00000152430	BOLL	34.7445
ENSG00000261236	BOP1	2.11915
ENSG00000165714	BORCS5	1.92684
ENSG00000162813	BPNT1	3.75579
ENSG00000171634	BPTF	19.138
ENSG00000157764	BRAF	14.7237
ENSG00000089234	BRAP	43.5735
ENSG00000139618	BRCA2	3.36811
ENSG00000100425	BRD1	25.4167
ENSG00000204256	BRD2	3.21273
ENSG00000169925	BRD3	2.9507
ENSG00000166164	BRD7	10.8417
ENSG00000112983	BRD8	58.452
ENSG00000185024	BRF1	2.45428
ENSG00000164713	BRI3	22.0079
ENSG00000113460	BRIX1	1.50718
ENSG00000254999	BRK1	59.8496
ENSG00000100916	BRMS1L	3.52312
ENSG00000156983	BRPF1	7.04967
ENSG00000096070	BRPF3	11.1452
ENSG00000185658	BRWD1	7.34063
ENSG00000064726	BTBD1	16.2026
ENSG00000184887	BTBD6	21.1535
ENSG00000134717	BTF3L4	10.7995
ENSG00000166167	BTRC	7.44157
ENSG00000169679	BUB1	28.5716
ENSG00000154473	BUB3	22.627
ENSG00000071462	BUD23	34.1403
ENSG00000106245	BUD31	33.0964
ENSG00000112578	BYSL	1.37731
ENSG00000136261	BZW2	3.63435
ENSG00000182919	C11orf54	6.13489
ENSG00000139637	C12orf10	46.0798
ENSG00000169609	C15orf40	4.46162
ENSG00000186073	C15orf41	5.65151
ENSG00000182831	C16orf72	9.23785
ENSG00000106392	C1GALT1	3.13458
ENSG00000143612	C1orf43	30.1185
ENSG00000164008	C1orf50	3.58314
ENSG00000108561	C1QBP	8.72961
ENSG00000265590	C21orf59-TCP10L	2.58065
ENSG00000157617	C2CD2	1.22554
ENSG00000111731	C2CD5	11.7118
ENSG00000179021	C3orf38	7.91508
ENSG00000082213	C5orf22	3.79073
ENSG00000130349	C6orf203	1.01237
ENSG00000146576	C7orf26	4.75851
ENSG00000136819	C9orf78	12.2432
ENSG00000155621	C9orf85	11.704
ENSG00000185015	CA13	1.65829
ENSG00000120159	CAAP1	1.37536
ENSG00000135932	CAB39	15.8349
ENSG00000102547	CAB39L	7.68066
ENSG00000151067	CACNA1C	1.9482
ENSG00000084774	CAD	2.21364
ENSG00000198668	CALM1	17.3768
ENSG00000143933	CALM2	187.06
ENSG00000160014	CALM3	149.285
ENSG00000179218	CALR	67.2998
ENSG00000128595	CALU	4.78002
ENSG00000134072	CAMK1	3.91734
ENSG00000145349	CAMK2D	1.25125
ENSG00000143919	CAMKMT	19.5029
ENSG00000108509	CAMTA2	9.29005
ENSG00000111530	CAND1	6.66595
ENSG00000171302	CANT1	13.7491
ENSG00000127022	CANX	24.4443
ENSG00000135387	CAPRIN1	79.4824
ENSG00000116489	CAPZA1	20.6488
ENSG00000198898	CAPZA2	2.10473
ENSG00000077549	CAPZB	38.6462
ENSG00000156017	CARNMT1	3.26092
ENSG00000134905	CARS2	8.09484
ENSG00000108349	CASC3	67.1294
ENSG00000158428	CATIP	4.08486
ENSG00000078699	CBFA2T2	9.2995
ENSG00000110395	CBL	20.971
ENSG00000114423	CBLB	7.94411
ENSG00000105879	CBLL1	23.804
ENSG00000167131	CCDC103	1.70788
ENSG00000103021	CCDC113	4.70889
ENSG00000105479	CCDC114	18.1097
ENSG00000244607	CCDC13	6.44955
ENSG00000104957	CCDC130	7.18469
ENSG00000154781	CCDC174	9.26522
ENSG00000165813	CCDC186	5.71853
ENSG00000147419	CCDC25	4.7875
ENSG00000145075	CCDC39	3.57659
ENSG00000141519	CCDC40	16.66
ENSG00000161973	CCDC42	59.5591
ENSG00000180329	CCDC43	4.56617
ENSG00000108588	CCDC47	10.5299
ENSG00000160124	CCDC58	7.77801
ENSG00000173093	CCDC63	3.02979
ENSG00000205476	CCDC85C	1.37812
ENSG00000110104	CCDC86	28.4591
ENSG00000115355	CCDC88A	107.079
ENSG00000142039	CCDC97	22.4308
ENSG00000134057	CCNB1	4.92851
ENSG00000157456	CCNB2	43.8549
ENSG00000112237	CCNC	7.29182
ENSG00000105173	CCNE1	3.38121
ENSG00000175305	CCNE2	9.24847
ENSG00000134480	CCNH	39.2458
ENSG00000090061	CCNK	30.4969
ENSG00000129315	CCNT1	8.84894
ENSG00000082258	CCNT2	10.2639
ENSG00000108100	CCNY	25.2099
ENSG00000163249	CCNYL1	11.2228
ENSG00000103540	CCP110	35.4849
ENSG00000166226	CCT2	66.9037
ENSG00000163468	CCT3	51.7133
ENSG00000115484	CCT4	28.418
ENSG00000150753	CCT5	28.5477
ENSG00000146731	CCT6A	13.6979
ENSG00000132141	CCT6B	69.0462
ENSG00000135624	CCT7	40.8614
ENSG00000156261	CCT8	14.0904
ENSG00000122674	CCZ1	14.0157
ENSG00000146574	CCZ1B	11.2237
ENSG00000169217	CD2BP2	2.5945
ENSG00000135404	CD63	21.76
ENSG00000140326	CDAN1	3.53424
ENSG00000079335	CDC14A	11.8229
ENSG00000081377	CDC14B	3.03601
ENSG00000130177	CDC16	13.4652
ENSG00000117399	CDC20	45.1811
ENSG00000094880	CDC23	1.98399
ENSG00000004897	CDC27	15.2104
ENSG00000099804	CDC34	10.5951
ENSG00000105401	CDC37	17.201
ENSG00000168438	CDC40	2.10074
ENSG00000070831	CDC42	13.6996
ENSG00000143776	CDC42BPA	11.4142
ENSG00000158985	CDC42SE2	19.8701
ENSG00000096401	CDC5L	4.30667
ENSG00000097046	CDC7	9.43668
ENSG00000134371	CDC73	4.58254
ENSG00000103502	CDIPT	4.3783
ENSG00000170312	CDK1	4.1442
ENSG00000185324	CDK10	7.00172
ENSG00000167258	CDK12	28.7418
ENSG00000065883	CDK13	10.1771
ENSG00000058091	CDK14	6.75894
ENSG00000102225	CDK16	6.61788
ENSG00000123374	CDK2	4.26736
ENSG00000101391	CDK5RAP1	6.90008
ENSG00000136861	CDK5RAP2	15.0808
ENSG00000108465	CDK5RAP3	63.7908
ENSG00000136807	CDK9	17.2997
ENSG00000163624	CDS1	1.69522
ENSG00000101290	CDS2	4.12833
ENSG00000153046	CDYL	2.495
ENSG00000166446	CDYL2	2.47722
ENSG00000115816	CEBPZ	20.7442
ENSG00000149187	CELF1	8.09363
ENSG00000048740	CELF2	3.49089
ENSG00000138778	CENPE	1.63131
ENSG00000151849	CENPJ	15.5234
ENSG00000141577	CEP131	5.81033
ENSG00000174799	CEP135	5.58894
ENSG00000103995	CEP152	14.7008
ENSG00000198707	CEP290	5.31114
ENSG00000121289	CEP89	4.09922
ENSG00000182504	CEP97	6.1335
ENSG00000134255	CEPT1	4.91513
ENSG00000100422	CERK	2.20001
ENSG00000143418	CERS2	8.41266
ENSG00000139624	CERS5	9.18105
ENSG00000172292	CERS6	1.74581
ENSG00000147400	CETN2	2.93702
ENSG00000163885	CFAP100	8.81851
ENSG00000272514	CFAP206	38.4115
ENSG00000159079	CFAP298	31.7532
ENSG00000160226	CFAP410	4.69713
ENSG00000213085	CFAP45	10.789
ENSG00000166596	CFAP52	10.8896
ENSG00000089101	CFAP61	13.2575
ENSG00000153774	CFDP1	20.1388
ENSG00000143942	CHAC2	4.24546
ENSG00000159259	CHAF1B	6.30945
ENSG00000153922	CHD1	8.73378
ENSG00000170004	CHD3	5.38377
ENSG00000111642	CHD4	10.8594
ENSG00000116254	CHD5	2.92857
ENSG00000149554	CHEK1	1.9106
ENSG00000085872	CHERP	8.38026
ENSG00000109220	CHIC2	13.968
ENSG00000177830	CHID1	17.5388
ENSG00000110721	CHKA	34.3708
ENSG00000100288	CHKB	22.3474
ENSG00000130724	CHMP2A	17.5484
ENSG00000083937	CHMP2B	1.15676
ENSG00000115561	CHMP3	11.5909
ENSG00000101421	CHMP4B	5.11075
ENSG00000086065	CHMP5	7.13428
ENSG00000176108	CHMP6	3.54385
ENSG00000110172	CHORDC1	3.24062
ENSG00000187446	CHP1	3.77892
ENSG00000111666	CHPT1	21.254
ENSG00000213341	CHUK	3.11447
ENSG00000144021	CIAO1	5.92267
ENSG00000166595	CIAO2B	21.5438
ENSG00000103245	CIAO3	1.77061
ENSG00000005194	CIAPIN1	56.7152
ENSG00000138433	CIR1	22.7167
ENSG00000122966	CIT	14.3326
ENSG00000175216	CKAP5	30.2326
ENSG00000173207	CKS1B	13.4163
ENSG00000123975	CKS2	79.2969
ENSG00000074054	CLASP1	5.28317
ENSG00000163539	CLASP2	3.99751
ENSG00000104859	CLASRP	9.92934
ENSG00000038532	CLEC16A	30.8532
ENSG00000130779	CLIP1	5.71195
ENSG00000013441	CLK1	8.39692
ENSG00000134852	CLOCK	27.2109
ENSG00000125656	CLPP	15.9644
ENSG00000104853	CLPTM1	21.499
ENSG00000049656	CLPTM1L	7.70862
ENSG00000166855	CLPX	12.9532
ENSG00000122705	CLTA	28.44
ENSG00000141367	CLTC	15.7186
ENSG00000070371	CLTCL1	15.4478
ENSG00000133313	CNDP2	7.33585
ENSG00000205423	CNEP1R1	3.96925
ENSG00000148842	CNNM2	3.22138
ENSG00000158158	CNNM4	10.4235
ENSG00000125107	CNOT1	140.751
ENSG00000182973	CNOT10	12.0406
ENSG00000158435	CNOT11	22.7587
ENSG00000113300	CNOT6	5.36117
ENSG00000138767	CNOT6L	2.85491
ENSG00000198791	CNOT7	4.48908
ENSG00000155508	CNOT8	5.9048
ENSG00000144580	CNOT9	13.8014
ENSG00000115649	CNPPD1	17.4456
ENSG00000257727	CNPY2	8.18876
ENSG00000137161	CNPY3	16.9881
ENSG00000183978	COA3	7.52319
ENSG00000166685	COG1	14.5128
ENSG00000135775	COG2	3.80947
ENSG00000136152	COG3	6.02088
ENSG00000103051	COG4	20.0985
ENSG00000164597	COG5	2.55489
ENSG00000133103	COG6	13.8034
ENSG00000168434	COG7	4.45905
ENSG00000060718	COL11A1	1.89533
ENSG00000139219	COL2A1	1.44228
ENSG00000168542	COL3A1	1.20426
ENSG00000113163	COL4A3BP	9.07292
ENSG00000114270	COL7A1	9.10039
ENSG00000130309	COLGALT1	1.49479
ENSG00000114744	COMMD2	15.2267
ENSG00000148444	COMMD3	8.3733
ENSG00000140365	COMMD4	80.1116
ENSG00000170619	COMMD5	1.91614
ENSG00000122218	COPA	8.80845
ENSG00000129083	COPB1	22.2167
ENSG00000184432	COPB2	10.0007
ENSG00000105669	COPE	11.8742
ENSG00000181789	COPG1	11.6951
ENSG00000158623	COPG2	11.9485
ENSG00000166200	COPS2	7.60047
ENSG00000141030	COPS3	51.4843
ENSG00000138663	COPS4	11.3359
ENSG00000121022	COPS5	25.3195
ENSG00000168090	COPS6	18.7039
ENSG00000111652	COPS7A	5.81251
ENSG00000144524	COPS7B	24.4402
ENSG00000198612	COPS8	9.06618
ENSG00000111481	COPZ1	18.5452
ENSG00000110871	COQ5	5.48366
ENSG00000119723	COQ6	9.02068
ENSG00000167186	COQ7	8.11782
ENSG00000088682	COQ9	16.3335
ENSG00000006695	COX10	12.2256
ENSG00000166260	COX11	9.67155
ENSG00000014919	COX15	8.81308
ENSG00000164919	COX6C	102.626
ENSG00000127184	COX7C	193.637
ENSG00000108582	CPD	5.91032
ENSG00000214575	CPEB1	7.51365
ENSG00000137449	CPEB2	6.3788
ENSG00000021826	CPS1	2.25306
ENSG00000165934	CPSF2	3.69113
ENSG00000119203	CPSF3	38.1579
ENSG00000160917	CPSF4	8.21451
ENSG00000111605	CPSF6	7.39811
ENSG00000224051	CPTP	6.12627
ENSG00000095321	CRAT	93.3622
ENSG00000113851	CRBN	19.0619
ENSG00000241258	CRCP	1.23271
ENSG00000118260	CREB1	17.2622
ENSG00000005339	CREBBP	16.9678
ENSG00000111269	CREBL2	5.07933
ENSG00000164463	CREBRF	9.16713
ENSG00000184164	CRELD2	18.5668
ENSG00000119878	CRIPT	5.69997
ENSG00000167193	CRK	2.08275
ENSG00000099942	CRKL	4.1565
ENSG00000088766	CRLS1	9.21656
ENSG00000101343	CRNKL1	4.10632
ENSG00000008405	CRY1	19.4307
ENSG00000121671	CRY2	20.5466
ENSG00000062485	CS	8.23533
ENSG00000139631	CSAD	3.95998
ENSG00000124207	CSE1L	77.3774
ENSG00000101266	CSNK2A1	23.8493
ENSG00000070770	CSNK2A2	61.6935
ENSG00000254598	CSNK2A3	6.82403
ENSG00000204435	CSNK2B	17.2009
ENSG00000101138	CSTF1	8.55333
ENSG00000101811	CSTF2	2.28509
ENSG00000177613	CSTF2T	1.8152
ENSG00000176102	CSTF3	17.4921
ENSG00000159692	CTBP1	10.9534
ENSG00000175029	CTBP2	6.10001
ENSG00000175826	CTDNEP1	61.8413
ENSG00000060069	CTDP1	5.37664
ENSG00000044115	CTNNA1	9.88019
ENSG00000066032	CTNNA2	3.72812
ENSG00000168036	CTNNB1	11.7202
ENSG00000132792	CTNNBL1	11.368
ENSG00000198730	CTR9	8.62673
ENSG00000164733	CTSB	1.32853
ENSG00000117984	CTSD	7.93628
ENSG00000085733	CTTN	10.7218
ENSG00000143079	CTTNBP2NL	3.66647
ENSG00000055130	CUL1	28.2221
ENSG00000108094	CUL2	8.32119
ENSG00000036257	CUL3	49.249
ENSG00000139842	CUL4A	44.8097
ENSG00000158290	CUL4B	4.29734
ENSG00000166266	CUL5	2.20264
ENSG00000112514	CUTA	9.23208
ENSG00000119929	CUTC	31.5387
ENSG00000150316	CWC15	42.1259
ENSG00000163510	CWC22	2.43885
ENSG00000273559	CWC25	18.8979
ENSG00000154832	CXXC1	9.43561
ENSG00000008283	CYB561	1.20447
ENSG00000166347	CYB5A	2.21845
ENSG00000103018	CYB5B	3.99602
ENSG00000167740	CYB5D2	31.4842
ENSG00000159348	CYB5R1	14.0439
ENSG00000166394	CYB5R2	75.283
ENSG00000100243	CYB5R3	17.858
ENSG00000065615	CYB5R4	2.72087
ENSG00000179091	CYC1	6.44424
ENSG00000172115	CYCS	5.24216
ENSG00000273749	CYFIP1	3.33991
ENSG00000055163	CYFIP2	1.00248
ENSG00000108669	CYTH1	5.82338
ENSG00000105443	CYTH2	9.10656
ENSG00000162384	CZIB	36.764
ENSG00000100592	DAAM1	5.08216
ENSG00000276644	DACH1	3.14734
ENSG00000129562	DAD1	57.0981
ENSG00000173402	DAG1	5.62162
ENSG00000178149	DALRD3	43.5205
ENSG00000112977	DAP	16.4555
ENSG00000132676	DAP3	14.9012
ENSG00000115866	DARS	4.19103
ENSG00000117593	DARS2	1.27301
ENSG00000204209	DAXX	4.51545
ENSG00000071626	DAZAP1	18.8843
ENSG00000006634	DBF4	25.0707
ENSG00000155368	DBI	113.567
ENSG00000136279	DBNL	7.90086
ENSG00000122741	DCAF10	18.9415
ENSG00000100897	DCAF11	2.32098
ENSG00000164934	DCAF13	7.47428
ENSG00000132017	DCAF15	6.16935
ENSG00000139990	DCAF5	31.4488
ENSG00000136485	DCAF7	15.0907
ENSG00000172992	DCAKD	19.492
ENSG00000172795	DCP2	1.6244
ENSG00000204843	DCTN1	16.7976
ENSG00000175203	DCTN2	29.182
ENSG00000132912	DCTN4	11.7896
ENSG00000166847	DCTN5	12.137
ENSG00000104671	DCTN6	3.94194
ENSG00000043093	DCUN1D1	41.8316
ENSG00000150401	DCUN1D2	1.7696
ENSG00000169738	DCXR	10.2288
ENSG00000130311	DDA1	6.40784
ENSG00000167986	DDB1	25.8393
ENSG00000244038	DDOST	15.3592
ENSG00000198171	DDRGK1	28.3344
ENSG00000079785	DDX1	16.4807
ENSG00000178105	DDX10	6.55641
ENSG00000157349	DDX19B	26.51
ENSG00000064703	DDX20	26.9131
ENSG00000174243	DDX23	5.76826
ENSG00000109832	DDX25	16.2419
ENSG00000124228	DDX27	7.07921
ENSG00000123136	DDX39A	109.902
ENSG00000198563	DDX39B	2.85145
ENSG00000198231	DDX42	13.2353
ENSG00000105671	DDX49	6.11688
ENSG00000108654	DDX5	38.1773
ENSG00000110367	DDX6	13.4192
ENSG00000177030	DEAF1	3.29715
ENSG00000143753	DEGS1	10.3052
ENSG00000174485	DENND4A	2.58622
ENSG00000198837	DENND4B	5.63269
ENSG00000137145	DENND4C	3.39595
ENSG00000184014	DENND5A	2.15516
ENSG00000170456	DENND5B	8.12106
ENSG00000174839	DENND6A	6.85098
ENSG00000205593	DENND6B	2.21927
ENSG00000139726	DENR	1.10468
ENSG00000100150	DEPDC5	4.64812
ENSG00000023697	DERA	1.56262
ENSG00000136986	DERL1	5.26854
ENSG00000072849	DERL2	10.2348
ENSG00000140543	DET1	3.43995
ENSG00000062282	DGAT2	12.6713
ENSG00000128191	DGCR8	5.57063
ENSG00000077044	DGKD	6.6728
ENSG00000153933	DGKE	9.32249
ENSG00000102780	DGKH	1.07959
ENSG00000117682	DHDDS	14.3779
ENSG00000102967	DHODH	4.75529
ENSG00000157326	DHRS4	5.04241
ENSG00000100612	DHRS7	2.44694
ENSG00000109016	DHRS7B	9.84394
ENSG00000109606	DHX15	11.558
ENSG00000204560	DHX16	2.0337
ENSG00000174953	DHX36	5.69224
ENSG00000140829	DHX38	23.3219
ENSG00000135829	DHX9	19.1941
ENSG00000131504	DIAPH1	8.61069
ENSG00000147202	DIAPH2	4.02124
ENSG00000100697	DICER1	6.82794
ENSG00000144535	DIS3L2	4.96611
ENSG00000150768	DLAT	9.1845
ENSG00000164741	DLC1	1.48075
ENSG00000091140	DLD	4.05922
ENSG00000075711	DLG1	13.6343
ENSG00000151208	DLG5	3.70984
ENSG00000119689	DLST	7.12587
ENSG00000105341	DMAC2	4.31278
ENSG00000125375	DMAC2L	4.69879
ENSG00000178028	DMAP1	6.96558
ENSG00000198947	DMD	1.12188
ENSG00000165506	DNAAF2	1.49391
ENSG00000167646	DNAAF3	61.875
ENSG00000256061	DNAAF4	11.1576
ENSG00000164818	DNAAF5	4.22932
ENSG00000158486	DNAH3	1.20784
ENSG00000115423	DNAH6	3.65068
ENSG00000118997	DNAH7	8.60248
ENSG00000124721	DNAH8	11.5967
ENSG00000122735	DNAI1	52.7993
ENSG00000171595	DNAI2	29.7266
ENSG00000132002	DNAJB1	60.2888
ENSG00000090520	DNAJB11	5.83979
ENSG00000187726	DNAJB13	15.4531
ENSG00000162616	DNAJB4	1.91662
ENSG00000137094	DNAJB5	4.88384
ENSG00000105993	DNAJB6	13.1869
ENSG00000007923	DNAJC11	4.31715
ENSG00000138246	DNAJC13	4.0752
ENSG00000135392	DNAJC14	2.59318
ENSG00000120675	DNAJC15	11.4761
ENSG00000116138	DNAJC16	4.44295
ENSG00000104129	DNAJC17	1.56552
ENSG00000205981	DNAJC19	7.25437
ENSG00000105821	DNAJC2	14.7124
ENSG00000102580	DNAJC3	2.76102
ENSG00000101152	DNAJC5	2.82551
ENSG00000147570	DNAJC5B	14.043
ENSG00000168259	DNAJC7	12.9419
ENSG00000126698	DNAJC8	10.6392
ENSG00000119661	DNAL1	17.9061
ENSG00000163879	DNALI1	26.5263
ENSG00000087470	DNM1L	15.1416
ENSG00000079805	DNM2	21.597
ENSG00000197959	DNM3	2.29362
ENSG00000150760	DOCK1	1.18368
ENSG00000134516	DOCK2	2.17527
ENSG00000175283	DOLK	5.66092
ENSG00000083097	DOP1A	8.10587
ENSG00000142197	DOP1B	1.58484
ENSG00000172269	DPAGT1	2.54405
ENSG00000166171	DPCD	70.4672
ENSG00000108963	DPH1	16.1395
ENSG00000132768	DPH2	5.77524
ENSG00000154813	DPH3	2.7387
ENSG00000117543	DPH5	3.10505
ENSG00000000419	DPM1	5.07591
ENSG00000179085	DPM3	22.9433
ENSG00000157856	DRC1	12.0113
ENSG00000159625	DRC7	25.0577
ENSG00000185721	DRG1	97.3928
ENSG00000108591	DRG2	1.59024
ENSG00000151914	DST	13.6871
ENSG00000125868	DSTN	5.49038
ENSG00000168393	DTYMK	1.96452
ENSG00000169718	DUS1L	17.029
ENSG00000141994	DUS3L	5.54892
ENSG00000081721	DUSP12	8.99485
ENSG00000112679	DUSP22	12.6806
ENSG00000128951	DUT	5.6825
ENSG00000107404	DVL1	6.81922
ENSG00000004975	DVL2	2.85824
ENSG00000161202	DVL3	4.44282
ENSG00000197102	DYNC1H1	15.683
ENSG00000077380	DYNC1I2	21.5763
ENSG00000144635	DYNC1LI1	22.8011
ENSG00000135720	DYNC1LI2	18.7527
ENSG00000187240	DYNC2H1	7.45422
ENSG00000088986	DYNLL1	121.548
ENSG00000264364	DYNLL2	9.30899
ENSG00000125971	DYNLRB1	18.2719
ENSG00000168589	DYNLRB2	188.637
ENSG00000157540	DYRK1A	9.40185
ENSG00000105204	DYRK1B	3.84827
ENSG00000010219	DYRK4	36.0826
ENSG00000205250	E2F4	10.6338
ENSG00000133740	E2F5	2.37453
ENSG00000145088	EAF2	3.06256
ENSG00000103356	EARS2	3.74651
ENSG00000117395	EBNA1BP2	11.993
ENSG00000104823	ECH1	10.5887
ENSG00000127884	ECHS1	10.3436
ENSG00000130159	ECSIT	1.42865
ENSG00000114346	ECT2	10.6943
ENSG00000179151	EDC3	8.06604
ENSG00000038358	EDC4	12.0515
ENSG00000088298	EDEM2	1.77708
ENSG00000116406	EDEM3	3.37214
ENSG00000107223	EDF1	38.048
ENSG00000156508	EEF1A1	39.2566
ENSG00000010165	EEF1AKNMT	3.2324
ENSG00000114942	EEF1B2	7.73108
ENSG00000104529	EEF1D	13.0662
ENSG00000124802	EEF1E1	7.83181
ENSG00000254772	EEF1G	54.6721
ENSG00000167658	EEF2	246.156
ENSG00000118894	EEF2KMT	4.89452
ENSG00000203666	EFCAB2	21.8773
ENSG00000140598	EFL1	3.91854
ENSG00000132294	EFR3A	10.7563
ENSG00000084710	EFR3B	1.67394
ENSG00000108883	EFTUD2	5.45144
ENSG00000135766	EGLN1	1.45444
ENSG00000269858	EGLN2	37.5126
ENSG00000115504	EHBP1	15.2669
ENSG00000110047	EHD1	10.8013
ENSG00000255150	EID3	12.3879
ENSG00000173812	EIF1	57.9451
ENSG00000175376	EIF1AD	5.15997
ENSG00000144895	EIF2A	6.27733
ENSG00000128829	EIF2AK4	1.48187
ENSG00000111361	EIF2B1	9.7233
ENSG00000119718	EIF2B2	12.012
ENSG00000070785	EIF2B3	14.0904
ENSG00000115211	EIF2B4	28.1787
ENSG00000145191	EIF2B5	9.42281
ENSG00000143486	EIF2D	22.9228
ENSG00000134001	EIF2S1	13.8641
ENSG00000125977	EIF2S2	13.9747
ENSG00000130741	EIF2S3	2.3195
ENSG00000180574	EIF2S3B	2.82041
ENSG00000107581	EIF3A	11.3146
ENSG00000106263	EIF3B	16.0537
ENSG00000184110	EIF3C	44.5657
ENSG00000205609	EIF3CL	42.5234
ENSG00000100353	EIF3D	27.1483
ENSG00000104408	EIF3E	27.3062
ENSG00000175390	EIF3F	33.0311
ENSG00000130811	EIF3G	47.894
ENSG00000147677	EIF3H	27.6128
ENSG00000084623	EIF3I	9.59814
ENSG00000178982	EIF3K	21.8873
ENSG00000100129	EIF3L	27.335
ENSG00000149100	EIF3M	14.3317
ENSG00000161960	EIF4A1	16.1893
ENSG00000156976	EIF4A2	51.6654
ENSG00000141543	EIF4A3	25.3915
ENSG00000063046	EIF4B	11.9338
ENSG00000151247	EIF4E	6.72827
ENSG00000135930	EIF4E2	21.3831
ENSG00000148730	EIF4EBP2	8.74898
ENSG00000114867	EIF4G1	14.6592
ENSG00000110321	EIF4G2	71.156
ENSG00000075151	EIF4G3	101.565
ENSG00000242372	EIF6	23.965
ENSG00000032389	EIPR1	4.82915
ENSG00000006744	ELAC2	8.54586
ENSG00000066044	ELAVL1	10.9187
ENSG00000011007	ELOA	6.78647
ENSG00000103363	ELOB	142.933
ENSG00000154582	ELOC	31.5912
ENSG00000134759	ELP2	14.5928
ENSG00000134014	ELP3	2.89312
ENSG00000109911	ELP4	13.6299
ENSG00000127463	EMC1	4.4669
ENSG00000104412	EMC2	10.7497
ENSG00000125037	EMC3	13.489
ENSG00000128463	EMC4	17.0593
ENSG00000127774	EMC6	8.78918
ENSG00000134153	EMC7	29.7214
ENSG00000131148	EMC8	7.00801
ENSG00000154920	EME1	17.1485
ENSG00000126749	EMG1	3.31964
ENSG00000154380	ENAH	4.44428
ENSG00000151023	ENKUR	2.9841
ENSG00000074800	ENO1	55.0877
ENSG00000111674	ENO2	3.87402
ENSG00000108515	ENO3	2.04947
ENSG00000145293	ENOPH1	1.41215
ENSG00000143420	ENSA	16.7062
ENSG00000187097	ENTPD5	8.39895
ENSG00000197586	ENTPD6	5.23741
ENSG00000165689	ENTR1	9.57187
ENSG00000120533	ENY2	16.6469
ENSG00000163378	EOGT	4.09899
ENSG00000100393	EP300	23.4323
ENSG00000183495	EP400	8.4087
ENSG00000116016	EPAS1	5.28956
ENSG00000088367	EPB41L1	5.81458
ENSG00000079819	EPB41L2	15.819
ENSG00000082397	EPB41L3	8.2372
ENSG00000115109	EPB41L5	18.334
ENSG00000120616	EPC1	10.2421
ENSG00000135999	EPC2	10.7112
ENSG00000063245	EPN1	1.92924
ENSG00000072134	EPN2	24.826
ENSG00000136628	EPRS	12.8289
ENSG00000085832	EPS15	23.911
ENSG00000127527	EPS15L1	12.0787
ENSG00000132591	ERAL1	10.9436
ENSG00000104884	ERCC2	5.2375
ENSG00000163161	ERCC3	9.21267
ENSG00000134899	ERCC5	3.2145
ENSG00000087502	ERGIC2	2.10634
ENSG00000125991	ERGIC3	143.852
ENSG00000100632	ERH	29.9399
ENSG00000086619	ERO1B	9.63755
ENSG00000023318	ERP44	4.87438
ENSG00000139684	ESD	22.9368
ENSG00000089048	ESF1	4.66831
ENSG00000120705	ETF1	6.77686
ENSG00000140374	ETFA	4.42485
ENSG00000105379	ETFB	10.6295
ENSG00000171503	ETFDH	16.1225
ENSG00000205707	ETFRF1	13.4225
ENSG00000139163	ETNK1	6.80783
ENSG00000143845	ETNK2	19.0618
ENSG00000142459	EVI5L	11.2801
ENSG00000081177	EXD2	18.5287
ENSG00000090989	EXOC1	8.44242
ENSG00000112685	EXOC2	9.34388
ENSG00000180104	EXOC3	14.3312
ENSG00000131558	EXOC4	18.9812
ENSG00000070367	EXOC5	14.8615
ENSG00000138190	EXOC6	2.76154
ENSG00000144036	EXOC6B	3.13424
ENSG00000182473	EXOC7	8.0205
ENSG00000116903	EXOC8	1.0062
ENSG00000171311	EXOSC1	7.9293
ENSG00000171824	EXOSC10	18.7028
ENSG00000107371	EXOSC3	13.7502
ENSG00000178896	EXOSC4	54.1834
ENSG00000075914	EXOSC7	6.48653
ENSG00000123737	EXOSC9	12.5024
ENSG00000151348	EXT2	5.88689
ENSG00000104313	EYA1	2.17599
ENSG00000112319	EYA4	6.3115
ENSG00000108799	EZH1	9.10681
ENSG00000106462	EZH2	17.8335
ENSG00000164687	FABP5	7.25972
ENSG00000185104	FAF1	12.8037
ENSG00000113194	FAF2	10.2264
ENSG00000103876	FAH	5.80514
ENSG00000180185	FAHD1	1.1898
ENSG00000115042	FAHD2A	10.2375
ENSG00000167106	FAM102A	4.13249
ENSG00000155744	FAM126B	1.5438
ENSG00000051009	FAM160A2	17.9152
ENSG00000214447	FAM187A	2.12478
ENSG00000172775	FAM192A	30.2053
ENSG00000177150	FAM210A	3.02442
ENSG00000153310	FAM49B	1.92131
ENSG00000071859	FAM50A	2.52158
ENSG00000119812	FAM98A	15.3276
ENSG00000171262	FAM98B	2.80364
ENSG00000144554	FANCD2	11.5315
ENSG00000140525	FANCI	12.7563
ENSG00000115392	FANCL	6.48967
ENSG00000187790	FANCM	3.71577
ENSG00000203780	FANK1	81.7357
ENSG00000145982	FARS2	2.88358
ENSG00000179115	FARSA	5.88488
ENSG00000116120	FARSB	8.15059
ENSG00000149806	FAU	141.259
ENSG00000105202	FBL	9.8115
ENSG00000166147	FBN1	2.03807
ENSG00000138829	FBN2	11.3247
ENSG00000153558	FBXL2	8.20575
ENSG00000108306	FBXL20	5.10807
ENSG00000138081	FBXO11	9.61426
ENSG00000143756	FBXO28	1.55965
ENSG00000165355	FBXO33	3.07381
ENSG00000037637	FBXO42	5.6807
ENSG00000072803	FBXW11	15.9295
ENSG00000107829	FBXW4	11.0661
ENSG00000159069	FBXW5	55.3312
ENSG00000119616	FCF1	1.98603
ENSG00000157107	FCHO2	2.55452
ENSG00000160752	FDPS	12.9544
ENSG00000137714	FDX1	1.85936
ENSG00000161513	FDXR	5.31414
ENSG00000066926	FECH	3.51016
ENSG00000169018	FEM1B	5.18876
ENSG00000145780	FEM1C	5.02949
ENSG00000151422	FER	1.87207
ENSG00000073712	FERMT2	1.51904
ENSG00000171055	FEZ2	1.84973
ENSG00000111790	FGFR1OP2	3.12628
ENSG00000066468	FGFR2	1.00669
ENSG00000172456	FGGY	1.92449
ENSG00000091483	FH	9.21991
ENSG00000172500	FIBP	33.8409
ENSG00000198855	FICD	3.1279
ENSG00000112367	FIG4	2.00514
ENSG00000145216	FIP1L1	35.1976
ENSG00000088832	FKBP1A	18.7182
ENSG00000198225	FKBP1C	1.87419
ENSG00000173486	FKBP2	42.4996
ENSG00000004478	FKBP4	36.4807
ENSG00000096060	FKBP5	10.5201
ENSG00000105701	FKBP8	11.4742
ENSG00000160688	FLAD1	7.46249
ENSG00000154803	FLCN	1.97359
ENSG00000177731	FLII	34.591
ENSG00000137312	FLOT1	4.35115
ENSG00000132589	FLOT2	1.26104
ENSG00000102081	FMR1	5.11961
ENSG00000187239	FNBP1	2.32478
ENSG00000137942	FNBP1L	3.25219
ENSG00000102531	FNDC3A	17.5679
ENSG00000217128	FNIP1	11.7854
ENSG00000052795	FNIP2	9.842
ENSG00000168522	FNTA	6.98003
ENSG00000257365	FNTB	7.79282
ENSG00000129654	FOXJ1	3.64689
ENSG00000164916	FOXK1	1.99182
ENSG00000141568	FOXK2	17.3502
ENSG00000275464	FP565260.1	1.95419
ENSG00000139926	FRMD6	5.64045
ENSG00000073910	FRY	2.55923
ENSG00000075539	FRYL	11.5331
ENSG00000167996	FTH1	43.8006
ENSG00000108592	FTSJ3	3.73948
ENSG00000162613	FUBP1	16.1298
ENSG00000107164	FUBP3	7.17591
ENSG00000165775	FUNDC2	2.11868
ENSG00000140564	FURIN	2.27576
ENSG00000089280	FUS	80.3571
ENSG00000033170	FUT8	11.6761
ENSG00000114416	FXR1	46.9144
ENSG00000129245	FXR2	4.88403
ENSG00000164930	FZD6	1.6551
ENSG00000105325	FZR1	12.0505
ENSG00000145907	G3BP1	8.11485
ENSG00000138757	G3BP2	31.8423
ENSG00000160211	G6PD	4.13256
ENSG00000109458	GAB1	1.73768
ENSG00000215568	GAB4	5.4444
ENSG00000170296	GABARAP	221.43
ENSG00000139112	GABARAPL1	6.6949
ENSG00000136928	GABBR2	1.03943
ENSG00000128683	GAD1	2.07992
ENSG00000179271	GADD45GIP1	10.0956
ENSG00000178950	GAK	12.9599
ENSG00000141429	GALNT1	2.18604
ENSG00000178234	GALNT11	6.00112
ENSG00000089597	GANAB	12.5261
ENSG00000214013	GANC	17.2252
ENSG00000111640	GAPDH	137.405
ENSG00000105679	GAPDHS	35.859
ENSG00000165219	GAPVD1	12.6276
ENSG00000109534	GAR1	9.91178
ENSG00000106105	GARS	14.3841
ENSG00000159131	GART	7.51619
ENSG00000185340	GAS2L1	3.71686
ENSG00000141013	GAS8	6.49336
ENSG00000157259	GATAD1	3.01888
ENSG00000167491	GATAD2A	6.40938
ENSG00000059691	GATB	3.40527
ENSG00000070610	GBA2	5.61881
ENSG00000114480	GBE1	1.37706
ENSG00000107862	GBF1	22.689
ENSG00000179562	GCC1	3.68429
ENSG00000135968	GCC2	6.31691
ENSG00000105607	GCDH	1.48636
ENSG00000001084	GCLC	2.8689
ENSG00000023909	GCLM	1.08558
ENSG00000089154	GCN1	5.03807
ENSG00000006007	GDE1	10.0009
ENSG00000203879	GDI1	3.88697
ENSG00000057608	GDI2	14.657
ENSG00000092208	GEMIN2	4.47604
ENSG00000239857	GET4	10.9133
ENSG00000168827	GFM1	3.87797
ENSG00000164347	GFM2	6.1549
ENSG00000141098	GFOD2	1.72762
ENSG00000198380	GFPT1	9.83277
ENSG00000131459	GFPT2	2.79916
ENSG00000006625	GGCT	1.64143
ENSG00000137563	GGH	4.09979
ENSG00000152904	GGPS1	9.59516
ENSG00000100031	GGT1	10.1265
ENSG00000131067	GGT7	1.09983
ENSG00000101193	GID8	3.29453
ENSG00000146830	GIGYF1	1.97762
ENSG00000204120	GIGYF2	21.5549
ENSG00000101003	GINS1	6.6532
ENSG00000181938	GINS3	2.40673
ENSG00000123159	GIPC1	1.66784
ENSG00000108262	GIT1	36.4617
ENSG00000139436	GIT2	10.5291
ENSG00000170266	GLB1	3.1212
ENSG00000138604	GLCE	1.60687
ENSG00000119392	GLE1	26.2987
ENSG00000124767	GLO1	1.42321
ENSG00000167699	GLOD4	6.32582
ENSG00000108010	GLRX3	11.4009
ENSG00000182512	GLRX5	11.5575
ENSG00000115419	GLS	4.74833
ENSG00000148672	GLUD1	4.92463
ENSG00000182890	GLUD2	3.12404
ENSG00000135821	GLUL	25.9385
ENSG00000197045	GMFB	1.18064
ENSG00000130755	GMFG	1.51493
ENSG00000163655	GMPS	12.8803
ENSG00000088256	GNA11	14.3095
ENSG00000146535	GNA12	3.00261
ENSG00000120063	GNA13	1.75061
ENSG00000127955	GNAI1	3.0502
ENSG00000114353	GNAI2	11.527
ENSG00000156052	GNAQ	1.76981
ENSG00000087460	GNAS	92.7079
ENSG00000078369	GNB1	29.7418
ENSG00000134697	GNL2	10.4682
ENSG00000163938	GNL3	5.5036
ENSG00000116906	GNPAT	11.4231
ENSG00000113552	GNPDA1	2.59311
ENSG00000163281	GNPDA2	1.94221
ENSG00000135677	GNS	13.8535
ENSG00000136935	GOLGA1	23.9984
ENSG00000167110	GOLGA2	3.27321
ENSG00000144674	GOLGA4	35.7107
ENSG00000147533	GOLGA7	15.4427
ENSG00000113384	GOLPH3	5.78044
ENSG00000143457	GOLPH3L	13.6362
ENSG00000114745	GORASP1	8.36091
ENSG00000115806	GORASP2	14.1874
ENSG00000108587	GOSR1	7.21273
ENSG00000120053	GOT1	14.2545
ENSG00000125166	GOT2	8.62985
ENSG00000197858	GPAA1	12.5138
ENSG00000119927	GPAM	2.20383
ENSG00000204438	GPANK1	1.00973
ENSG00000138678	GPAT3	3.31816
ENSG00000158669	GPAT4	6.01909
ENSG00000076650	GPATCH1	2.5259
ENSG00000152133	GPATCH11	7.35557
ENSG00000160818	GPATCH4	4.76848
ENSG00000213420	GPC2	5.85464
ENSG00000125772	GPCPD1	4.29347
ENSG00000105220	GPI	11.6838
ENSG00000198522	GPN1	9.84936
ENSG00000142751	GPN2	1.86109
ENSG00000111231	GPN3	4.5782
ENSG00000148358	GPR107	2.96492
ENSG00000169727	GPS1	21.1874
ENSG00000121957	GPSM2	5.85551
ENSG00000166123	GPT2	2.0072
ENSG00000177885	GRB2	1.07933
ENSG00000137106	GRHPR	5.71211
ENSG00000155511	GRIA1	8.00238
ENSG00000120251	GRIA2	1.49722
ENSG00000178719	GRINA	124.443
ENSG00000109519	GRPEL1	4.05289
ENSG00000186088	GSAP	1.83301
ENSG00000103342	GSPT1	10.97
ENSG00000189369	GSPT2	1.00748
ENSG00000138780	GSTCD	6.61354
ENSG00000100577	GSTZ1	21.7643
ENSG00000165417	GTF2A1	7.15303
ENSG00000140307	GTF2A2	41.4268
ENSG00000137947	GTF2B	5.80054
ENSG00000153767	GTF2E1	1.95717
ENSG00000197265	GTF2E2	6.23458
ENSG00000125651	GTF2F1	13.0737
ENSG00000188342	GTF2F2	4.47179
ENSG00000110768	GTF2H1	10.4582
ENSG00000145736	GTF2H2	2.52617
ENSG00000111358	GTF2H3	2.25876
ENSG00000122034	GTF3A	7.79475
ENSG00000077235	GTF3C1	13.0563
ENSG00000115207	GTF3C2	5.7103
ENSG00000172432	GTPBP2	12.3932
ENSG00000107937	GTPBP4	2.52626
ENSG00000170627	GTSF1	239.009
ENSG00000143774	GUK1	40.1667
ENSG00000169919	GUSB	17.6281
ENSG00000206527	HACD2	6.15513
ENSG00000131373	HACL1	72.2314
ENSG00000084754	HADHA	39.9626
ENSG00000138029	HADHB	17.5909
ENSG00000063854	HAGH	25.4712
ENSG00000170445	HARS	8.05446
ENSG00000128708	HAT1	4.58713
ENSG00000147874	HAUS6	5.3351
ENSG00000112339	HBS1L	8.78311
ENSG00000172534	HCFC1	1.89761
ENSG00000116478	HDAC1	12.8357
ENSG00000196591	HDAC2	3.87879
ENSG00000068024	HDAC4	8.22182
ENSG00000111906	HDDC2	49.5667
ENSG00000184508	HDDC3	3.73582
ENSG00000119285	HEATR1	8.01856
ENSG00000155393	HEATR3	5.69537
ENSG00000092148	HECTD1	11.9058
ENSG00000165338	HECTD2	3.66954
ENSG00000114735	HEMK1	1.58415
ENSG00000162639	HENMT1	32.8448
ENSG00000128731	HERC2	1.88414
ENSG00000148634	HERC4	6.26887
ENSG00000122557	HERPUD2	12.6781
ENSG00000186834	HEXIM1	8.70325
ENSG00000235173	HGH1	4.53492
ENSG00000185359	HGS	16.7288
ENSG00000165102	HGSNAT	1.0642
ENSG00000106049	HIBADH	6.00993
ENSG00000198130	HIBCH	12.8689
ENSG00000100644	HIF1A	7.11515
ENSG00000149196	HIKESHI	5.29914
ENSG00000111911	HINT3	2.12328
ENSG00000127946	HIP1	3.16059
ENSG00000130787	HIP1R	1.22341
ENSG00000100084	HIRA	1.58461
ENSG00000156515	HK1	6.92947
ENSG00000159267	HLCS	3.23737
ENSG00000101294	HM13	9.57766
ENSG00000183624	HMCES	13.294
ENSG00000140382	HMG20A	7.21176
ENSG00000189403	HMGB1	2.7621
ENSG00000117305	HMGCL	3.5198
ENSG00000113161	HMGCR	3.85184
ENSG00000112972	HMGCS1	6.8147
ENSG00000134240	HMGCS2	4.79865
ENSG00000103415	HMOX2	12.7207
ENSG00000135486	HNRNPA1	7.50882
ENSG00000139675	HNRNPA1L2	1.6484
ENSG00000122566	HNRNPA2B1	146.166
ENSG00000170144	HNRNPA3	37.0203
ENSG00000092199	HNRNPC	27.6565
ENSG00000169813	HNRNPF	28.6093
ENSG00000169045	HNRNPH1	41.6276
ENSG00000126945	HNRNPH2	2.12452
ENSG00000165119	HNRNPK	55.2118
ENSG00000104824	HNRNPL	20.3251
ENSG00000143889	HNRNPLL	20.1195
ENSG00000099783	HNRNPM	28.0827
ENSG00000125944	HNRNPR	2.98951
ENSG00000153187	HNRNPU	37.2485
ENSG00000168172	HOOK3	3.46874
ENSG00000107521	HPS1	5.66962
ENSG00000100099	HPS4	5.90601
ENSG00000230989	HSBP1	33.1953
ENSG00000100209	HSCB	1.37431
ENSG00000072506	HSD17B10	4.76411
ENSG00000149084	HSD17B12	2.67868
ENSG00000119471	HSDL2	4.71075
ENSG00000185122	HSF1	11.5111
ENSG00000080824	HSP90AA1	179.712
ENSG00000096384	HSP90AB1	43.8239
ENSG00000166598	HSP90B1	55.2954
ENSG00000204389	HSPA1A	2.49045
ENSG00000204388	HSPA1B	1.83854
ENSG00000204390	HSPA1L	3.03978
ENSG00000126803	HSPA2	82.1934
ENSG00000170606	HSPA4	13.0899
ENSG00000164070	HSPA4L	14.0365
ENSG00000044574	HSPA5	41.0992
ENSG00000109971	HSPA8	103.758
ENSG00000113013	HSPA9	11.7406
ENSG00000106211	HSPB1	1.8192
ENSG00000169087	HSPBAP1	9.85769
ENSG00000133265	HSPBP1	6.88352
ENSG00000144381	HSPD1	5.17464
ENSG00000115541	HSPE1	5.29733
ENSG00000120694	HSPH1	32.91
ENSG00000102241	HTATSF1	5.3572
ENSG00000086758	HUWE1	11.6929
ENSG00000157423	HYDIN	10.1841
ENSG00000149428	HYOU1	19.291
ENSG00000196305	IARS	7.90979
ENSG00000003147	ICA1	8.94244
ENSG00000163596	ICA1L	13.5299
ENSG00000116237	ICMT	2.83571
ENSG00000125968	ID1	1.08622
ENSG00000138413	IDH1	8.38047
ENSG00000166411	IDH3A	4.1487
ENSG00000101365	IDH3B	17.2234
ENSG00000067829	IDH3G	3.42001
ENSG00000067064	IDI1	7.28399
ENSG00000006652	IFRD1	7.46221
ENSG00000163913	IFT122	84.5821
ENSG00000187535	IFT140	14.3012
ENSG00000119650	IFT43	26.9136
ENSG00000032742	IFT88	55.0035
ENSG00000089289	IGBP1	2.53329
ENSG00000140443	IGF1R	4.66008
ENSG00000113141	IK	63.8522
ENSG00000104365	IKBKB	4.76824
ENSG00000143621	ILF2	53.0188
ENSG00000166333	ILK	13.8181
ENSG00000148950	IMMP1L	9.88007
ENSG00000184903	IMMP2L	4.90195
ENSG00000132305	IMMT	16.54
ENSG00000177971	IMP3	1.95168
ENSG00000136718	IMP4	16.4483
ENSG00000133731	IMPA1	5.16963
ENSG00000104331	IMPAD1	10.7416
ENSG00000178035	IMPDH2	12.2064
ENSG00000153487	ING1	1.539
ENSG00000111653	ING4	1.90751
ENSG00000168395	ING5	7.25323
ENSG00000128908	INO80	5.78149
ENSG00000151689	INPP1	13.4809
ENSG00000040933	INPP4A	10.3288
ENSG00000148384	INPP5E	5.89488
ENSG00000132376	INPP5K	7.51749
ENSG00000171105	INSR	1.28321
ENSG00000164880	INTS1	8.20431
ENSG00000104613	INTS10	2.54391
ENSG00000138785	INTS12	3.66324
ENSG00000064102	INTS13	1.39478
ENSG00000138614	INTS14	5.78835
ENSG00000108506	INTS2	2.47793
ENSG00000143624	INTS3	15.1997
ENSG00000102786	INTS6	33.0778
ENSG00000165359	INTS6L	1.17467
ENSG00000176095	IP6K1	16.256
ENSG00000151151	IPMK	1.07322
ENSG00000065150	IPO5	71.7346
ENSG00000205339	IPO7	2.9522
ENSG00000133704	IPO8	9.76421
ENSG00000198700	IPO9	12.3993
ENSG00000197429	IPP	1.86981
ENSG00000144711	IQSEC1	2.86468
ENSG00000164675	IQUB	19.5492
ENSG00000184216	IRAK1	1.09335
ENSG00000198001	IRAK4	3.28374
ENSG00000165898	ISCA2	13.6923
ENSG00000136003	ISCU	23.3181
ENSG00000105655	ISYNA1	50.2127
ENSG00000078747	ITCH	11.8197
ENSG00000129636	ITFG1	7.38269
ENSG00000091409	ITGA6	4.38205
ENSG00000135424	ITGA7	2.69938
ENSG00000138448	ITGAV	1.08969
ENSG00000150093	ITGB1	2.90041
ENSG00000125877	ITPA	9.83449
ENSG00000137825	ITPKA	1.45847
ENSG00000205726	ITSN1	3.65276
ENSG00000198399	ITSN2	5.70484
ENSG00000128928	IVD	10.8098
ENSG00000163166	IWS1	13.3648
ENSG00000043143	JADE2	1.27169
ENSG00000171135	JAGN1	4.42162
ENSG00000162434	JAK1	14.731
ENSG00000096968	JAK2	4.74001
ENSG00000153814	JAZF1	2.80176
ENSG00000081692	JMJD4	2.93701
ENSG00000100221	JOSD1	3.63944
ENSG00000107104	KANK1	4.91526
ENSG00000120071	KANSL1	11.425
ENSG00000139620	KANSL2	7.31489
ENSG00000114982	KANSL3	32.0288
ENSG00000065427	KARS	31.5816
ENSG00000108773	KAT2A	3.10813
ENSG00000172977	KAT5	15.6604
ENSG00000083168	KAT6A	12.3654
ENSG00000156650	KAT6B	3.41057
ENSG00000136504	KAT7	29.1353
ENSG00000103510	KAT8	9.0588
ENSG00000186625	KATNA1	7.62189
ENSG00000102781	KATNAL1	4.51932
ENSG00000167216	KATNAL2	7.65259
ENSG00000140854	KATNB1	10.7403
ENSG00000180901	KCTD2	9.43782
ENSG00000167977	KCTD5	2.12348
ENSG00000104756	KCTD9	5.43369
ENSG00000105438	KDELR1	49.279
ENSG00000136240	KDELR2	30.5518
ENSG00000004487	KDM1A	47.3733
ENSG00000173120	KDM2A	28.3336
ENSG00000089094	KDM2B	1.84055
ENSG00000127663	KDM4B	7.95138
ENSG00000100890	KIAA0391	3.43979
ENSG00000138688	KIAA1109	14.4981
ENSG00000162929	KIAA1841	1.47612
ENSG00000116685	KIAA2013	9.18483
ENSG00000138160	KIF11	4.86138
ENSG00000197892	KIF13B	1.95996
ENSG00000118193	KIF14	3.70113
ENSG00000089177	KIF16B	3.31738
ENSG00000121621	KIF18A	8.83021
ENSG00000186185	KIF18B	7.71164
ENSG00000130294	KIF1A	1.22986
ENSG00000054523	KIF1B	9.1498
ENSG00000198954	KIF1BP	4.12414
ENSG00000129250	KIF1C	2.13725
ENSG00000139116	KIF21A	2.44671
ENSG00000116852	KIF21B	3.21001
ENSG00000068796	KIF2A	35.307
ENSG00000142945	KIF2C	20.0146
ENSG00000131437	KIF3A	9.88191
ENSG00000101350	KIF3B	10.2913
ENSG00000155980	KIF5A	5.96606
ENSG00000170759	KIF5B	31.5207
ENSG00000168280	KIF5C	4.01668
ENSG00000075945	KIFAP3	6.9523
ENSG00000237649	KIFC1	1.15203
ENSG00000126214	KLC1	7.8397
ENSG00000137171	KLC4	10.816
ENSG00000128607	KLHDC10	14.0118
ENSG00000104731	KLHDC4	23.1303
ENSG00000076321	KLHL20	7.17002
ENSG00000146021	KLHL3	5.58296
ENSG00000109790	KLHL5	3.6702
ENSG00000118058	KMT2A	3.83972
ENSG00000272333	KMT2B	11.0376
ENSG00000055609	KMT2C	10.7055
ENSG00000005483	KMT2E	16.5106
ENSG00000114030	KPNA1	9.46974
ENSG00000182481	KPNA2	66.5762
ENSG00000196911	KPNA5	7.35945
ENSG00000025800	KPNA6	9.2597
ENSG00000108424	KPNB1	56.1129
ENSG00000133703	KRAS	2.43214
ENSG00000111615	KRR1	3.63014
ENSG00000163463	KRTCAP2	186.221
ENSG00000141068	KSR1	6.08544
ENSG00000105700	KXD1	23.3376
ENSG00000171097	KYAT1	1.19883
ENSG00000137944	KYAT3	2.53544
ENSG00000101680	LAMA1	1.45473
ENSG00000196569	LAMA2	1.52543
ENSG00000091136	LAMB1	2.04808
ENSG00000172037	LAMB2	4.76325
ENSG00000135862	LAMC1	1.88318
ENSG00000185896	LAMP1	26.6822
ENSG00000116586	LAMTOR2	11.5439
ENSG00000109270	LAMTOR3	1.53107
ENSG00000002549	LAP3	10.8289
ENSG00000068697	LAPTM4A	139.775
ENSG00000161813	LARP4	4.83998
ENSG00000133706	LARS	6.37977
ENSG00000001497	LAS1L	4.86864
ENSG00000131023	LATS1	9.99838
ENSG00000150457	LATS2	4.68482
ENSG00000135338	LCA5	3.16698
ENSG00000205629	LCMT1	21.9478
ENSG00000198728	LDB1	5.40132
ENSG00000169744	LDB2	1.59786
ENSG00000166800	LDHAL6A	7.45736
ENSG00000171989	LDHAL6B	12.5653
ENSG00000111716	LDHB	14.6192
ENSG00000130164	LDLR	1.48613
ENSG00000174106	LEMD3	7.6585
ENSG00000167615	LENG8	45.7269
ENSG00000166477	LEO1	6.91984
ENSG00000213625	LEPROT	4.14902
ENSG00000104660	LEPROTL1	10.2488
ENSG00000168924	LETM1	3.88258
ENSG00000121897	LIAS	7.08571
ENSG00000105486	LIG1	2.20613
ENSG00000169756	LIMS1	3.06552
ENSG00000267796	LIN37	15.2767
ENSG00000104863	LIN7B	2.10877
ENSG00000183814	LIN9	5.26639
ENSG00000079435	LIPE	11.3346
ENSG00000144182	LIPT1	3.41372
ENSG00000131899	LLGL1	1.25923
ENSG00000074695	LMAN1	2.99529
ENSG00000164187	LMBRD2	1.33367
ENSG00000185621	LMLN	13.187
ENSG00000160789	LMNA	12.5318
ENSG00000113368	LMNB1	1.25341
ENSG00000176619	LMNB2	1.37717
ENSG00000144320	LNPK	6.3141
ENSG00000196365	LONP1	4.20979
ENSG00000111684	LPCAT3	10.5615
ENSG00000134324	LPIN1	25.522
ENSG00000101577	LPIN2	4.44689
ENSG00000165501	LRR1	22.3895
ENSG00000125122	LRRC29	3.45622
ENSG00000171757	LRRC34	7.77535
ENSG00000066557	LRRC40	1.97519
ENSG00000108829	LRRC59	11.4329
ENSG00000129295	LRRC6	29.9947
ENSG00000093167	LRRFIP2	24.7928
ENSG00000175324	LSM1	2.16316
ENSG00000161654	LSM12	15.3956
ENSG00000170860	LSM3	6.08766
ENSG00000106355	LSM5	2.27556
ENSG00000164167	LSM6	1.60297
ENSG00000130332	LSM7	5.45406
ENSG00000128534	LSM8	4.50011
ENSG00000111144	LTA4H	5.91496
ENSG00000198862	LTN1	4.79856
ENSG00000135521	LTV1	3.371
ENSG00000007392	LUC7L	35.3113
ENSG00000108848	LUC7L3	14.1079
ENSG00000145220	LYAR	63.5156
ENSG00000120992	LYPLA1	9.36681
ENSG00000143353	LYPLAL1	3.16469
ENSG00000214113	LYRM4	5.73897
ENSG00000176018	LYSMD3	2.12668
ENSG00000143669	LYST	13.8886
ENSG00000183833	MAATS1	21.9948
ENSG00000127603	MACF1	9.18311
ENSG00000204178	MACO1	9.59898
ENSG00000002822	MAD1L1	6.41813
ENSG00000164109	MAD2L1	2.19741
ENSG00000116670	MAD2L2	22.3204
ENSG00000090316	MAEA	6.99743
ENSG00000143194	MAEL	56.8147
ENSG00000179632	MAF1	19.1583
ENSG00000162385	MAGOH	4.20701
ENSG00000111196	MAGOHB	1.17867
ENSG00000162972	MAIP1	1.76623
ENSG00000198042	MAK16	1.67927
ENSG00000156928	MALSU1	18.5429
ENSG00000198162	MAN1A2	4.18086
ENSG00000177239	MAN1B1	9.89298
ENSG00000112893	MAN2A1	3.46037
ENSG00000196547	MAN2A2	58.2717
ENSG00000145050	MANF	26.5821
ENSG00000101460	MAP1LC3A	4.94827
ENSG00000065559	MAP2K4	2.85469
ENSG00000100030	MAPK1	7.88027
ENSG00000109339	MAPK10	11.7893
ENSG00000112062	MAPK14	3.48891
ENSG00000181085	MAPK15	1.25092
ENSG00000102882	MAPK3	6.42124
ENSG00000107643	MAPK8	10.7535
ENSG00000050748	MAPK9	6.36447
ENSG00000119487	MAPKAP1	27.082
ENSG00000162889	MAPKAPK2	7.02156
ENSG00000114738	MAPKAPK3	1.41605
ENSG00000137802	MAPKBP1	15.7206
ENSG00000101367	MAPRE1	10.6675
ENSG00000084764	MAPRE3	9.30147
ENSG00000186205	MARC1	1.06952
ENSG00000117791	MARC2	1.96862
ENSG00000145416	MARCH1	2.42727
ENSG00000198060	MARCH5	2.22852
ENSG00000166783	MARF1	6.73515
ENSG00000116141	MARK1	4.30449
ENSG00000075413	MARK3	17.3912
ENSG00000166986	MARS	12.9977
ENSG00000086015	MAST2	39.677
ENSG00000120539	MASTL	7.59043
ENSG00000151224	MAT1A	2.02142
ENSG00000168906	MAT2A	29.5309
ENSG00000134046	MBD2	10.9487
ENSG00000071655	MBD3	3.10612
ENSG00000204406	MBD5	14.2184
ENSG00000152601	MBNL1	1.56246
ENSG00000139793	MBNL2	2.76953
ENSG00000076770	MBNL3	6.07334
ENSG00000143797	MBOAT2	1.11602
ENSG00000140943	MBTPS1	4.70887
ENSG00000100294	MCAT	3.39513
ENSG00000078070	MCCC1	8.70906
ENSG00000131844	MCCC2	1.93465
ENSG00000180398	MCFD2	5.37704
ENSG00000073111	MCM2	3.56426
ENSG00000160294	MCM3AP	11.6682
ENSG00000104738	MCM4	23.3443
ENSG00000100297	MCM5	3.70787
ENSG00000076003	MCM6	2.30551
ENSG00000166508	MCM7	14.0207
ENSG00000147316	MCPH1	4.06565
ENSG00000172366	MCRIP2	8.05715
ENSG00000187778	MCRS1	9.79482
ENSG00000232119	MCTS1	1.45701
ENSG00000156026	MCU	7.40804
ENSG00000014641	MDH1	7.64859
ENSG00000146701	MDH2	64.8813
ENSG00000065833	ME1	2.00357
ENSG00000151376	ME3	4.72259
ENSG00000163875	MEAF6	11.9282
ENSG00000140950	MEAK7	2.02292
ENSG00000116353	MECR	5.10851
ENSG00000125686	MED1	21.1812
ENSG00000133398	MED10	7.03451
ENSG00000184634	MED12	3.90069
ENSG00000144893	MED12L	5.35098
ENSG00000108510	MED13	14.215
ENSG00000123066	MED13L	4.20472
ENSG00000099917	MED15	20.0444
ENSG00000042429	MED17	2.06816
ENSG00000156603	MED19	10.5988
ENSG00000152944	MED21	61.2251
ENSG00000112282	MED23	10.3213
ENSG00000008838	MED24	13.7479
ENSG00000104973	MED25	12.7079
ENSG00000160563	MED27	10.4723
ENSG00000118579	MED28	3.73459
ENSG00000164758	MED30	8.65243
ENSG00000108590	MED31	8.14173
ENSG00000136146	MED4	8.58748
ENSG00000133997	MED6	5.4142
ENSG00000155868	MED7	7.06475
ENSG00000133895	MEN1	7.39378
ENSG00000164024	METAP1	9.19196
ENSG00000111142	METAP2	17.7216
ENSG00000037897	METTL1	2.20887
ENSG00000145388	METTL14	1.14241
ENSG00000169519	METTL15	7.12147
ENSG00000171806	METTL18	1.02435
ENSG00000181038	METTL23	33.3752
ENSG00000127720	METTL25	2.30599
ENSG00000087995	METTL2A	2.71737
ENSG00000165055	METTL2B	2.74452
ENSG00000165819	METTL3	17.074
ENSG00000101574	METTL4	1.26287
ENSG00000176624	MEX3C	21.9
ENSG00000140259	MFAP1	5.70237
ENSG00000171109	MFN1	3.81345
ENSG00000116688	MFN2	16.0009
ENSG00000118855	MFSD1	2.08
ENSG00000131446	MGAT1	20.0881
ENSG00000168282	MGAT2	4.51802
ENSG00000102858	MGRN1	1.30429
ENSG00000008394	MGST1	1.79681
ENSG00000101752	MIB1	9.15447
ENSG00000197530	MIB2	3.61209
ENSG00000173436	MICOS10	13.0906
ENSG00000107745	MICU1	11.1501
ENSG00000155970	MICU3	5.34301
ENSG00000167470	MIDN	1.46858
ENSG00000141741	MIEN1	31.7653
ENSG00000198160	MIER1	4.12684
ENSG00000125457	MIF4GD	5.46486
ENSG00000148481	MINDY3	5.77071
ENSG00000107789	MINPP1	1.68281
ENSG00000164654	MIOS	11.4781
ENSG00000027001	MIPEP	3.70905
ENSG00000158411	MITD1	1.56894
ENSG00000128585	MKLN1	9.24131
ENSG00000079277	MKNK1	5.62799
ENSG00000133606	MKRN1	54.3679
ENSG00000076242	MLH1	21.2265
ENSG00000130382	MLLT1	3.11257
ENSG00000078403	MLLT10	148.867
ENSG00000275023	MLLT6	3.99676
ENSG00000167965	MLST8	7.35561
ENSG00000108788	MLX	3.25708
ENSG00000175727	MLXIP	2.71862
ENSG00000009950	MLXIPL	4.85392
ENSG00000155229	MMS19	10.0035
ENSG00000020426	MNAT1	6.07132
ENSG00000138587	MNS1	16.4348
ENSG00000114978	MOB1A	11.1571
ENSG00000173542	MOB1B	6.63702
ENSG00000182208	MOB2	1.57794
ENSG00000172081	MOB3A	6.39759
ENSG00000115540	MOB4	1.40186
ENSG00000124217	MOCS3	1.60763
ENSG00000115275	MOGS	7.4218
ENSG00000164077	MON1A	5.05413
ENSG00000103111	MON1B	4.29281
ENSG00000061987	MON2	4.56036
ENSG00000185787	MORF4L1	101.13
ENSG00000139714	MORN3	5.1173
ENSG00000185681	MORN5	42.3966
ENSG00000073146	MOV10L1	19.1102
ENSG00000060762	MPC1	7.58977
ENSG00000143158	MPC2	85.4242
ENSG00000129255	MPDU1	9.36648
ENSG00000124383	MPHOSPH10	3.15608
ENSG00000178802	MPI	7.46953
ENSG00000108852	MPP2	1.67781
ENSG00000072415	MPP5	6.85796
ENSG00000101189	MRGBP	41.2309
ENSG00000171861	MRM3	5.97387
ENSG00000179832	MROH1	6.18843
ENSG00000169288	MRPL1	1.23855
ENSG00000174547	MRPL11	3.05753
ENSG00000262814	MRPL12	4.4971
ENSG00000172172	MRPL13	10.9142
ENSG00000180992	MRPL14	16.9646
ENSG00000137547	MRPL15	1.86987
ENSG00000166902	MRPL16	7.12604
ENSG00000158042	MRPL17	6.43347
ENSG00000115364	MRPL19	3.95709
ENSG00000112651	MRPL2	7.35027
ENSG00000197345	MRPL21	15.1764
ENSG00000082515	MRPL22	9.87492
ENSG00000143314	MRPL24	11.5437
ENSG00000108826	MRPL27	14.2509
ENSG00000086504	MRPL28	12.0801
ENSG00000114686	MRPL3	20.3147
ENSG00000132313	MRPL35	1.9483
ENSG00000204316	MRPL38	12.113
ENSG00000154719	MRPL39	13.2946
ENSG00000105364	MRPL4	5.88756
ENSG00000185608	MRPL40	15.3104
ENSG00000055950	MRPL43	83.3173
ENSG00000135900	MRPL44	3.16878
ENSG00000259494	MRPL46	11.9441
ENSG00000136522	MRPL47	18.7795
ENSG00000175581	MRPL48	3.19502
ENSG00000149792	MRPL49	2.24546
ENSG00000111639	MRPL51	111.059
ENSG00000183617	MRPL54	40.2164
ENSG00000162910	MRPL55	16.3556
ENSG00000143436	MRPL9	9.91527
ENSG00000181991	MRPS11	23.3927
ENSG00000120333	MRPS14	8.14405
ENSG00000096080	MRPS18A	6.66328
ENSG00000163319	MRPS18C	1.82474
ENSG00000122140	MRPS2	9.80415
ENSG00000175110	MRPS22	22.6334
ENSG00000181610	MRPS23	2.22599
ENSG00000131368	MRPS25	9.40597
ENSG00000112996	MRPS30	6.0255
ENSG00000102738	MRPS31	12.644
ENSG00000090263	MRPS33	10.5088
ENSG00000074071	MRPS34	9.27145
ENSG00000061794	MRPS35	2.20155
ENSG00000144029	MRPS5	12.4533
ENSG00000125445	MRPS7	11.0497
ENSG00000135972	MRPS9	10.5149
ENSG00000148187	MRRF	16.0989
ENSG00000053372	MRTO4	7.93044
ENSG00000066697	MSANTD3	1.16448
ENSG00000116062	MSH6	6.38935
ENSG00000174579	MSL2	7.96521
ENSG00000005302	MSL3	4.33934
ENSG00000198804	MT-CO1	3781.89
ENSG00000198712	MT-CO2	2950.21
ENSG00000198938	MT-CO3	2947.64
ENSG00000198727	MT-CYB	901.681
ENSG00000198840	MT-ND3	659.951
ENSG00000198786	MT-ND5	1103.51
ENSG00000182979	MTA1	13.5691
ENSG00000149480	MTA2	10.0555
ENSG00000057935	MTA3	11.3553
ENSG00000099810	MTAP	1.5857
ENSG00000109919	MTCH2	23.939
ENSG00000156469	MTERF3	2.58506
ENSG00000188786	MTF1	6.6757
ENSG00000148824	MTG1	9.90525
ENSG00000101181	MTG2	10.0284
ENSG00000100714	MTHFD1	1.22131
ENSG00000065911	MTHFD2	1.83697
ENSG00000163738	MTHFD2L	5.4128
ENSG00000171100	MTM1	1.77016
ENSG00000166912	MTMR10	2.47566
ENSG00000150712	MTMR12	20.8143
ENSG00000163719	MTMR14	8.03616
ENSG00000087053	MTMR2	22.446
ENSG00000100330	MTMR3	9.60624
ENSG00000108389	MTMR4	4.80193
ENSG00000139505	MTMR6	12.2624
ENSG00000003987	MTMR7	1.75523
ENSG00000104643	MTMR9	3.66985
ENSG00000135297	MTO1	4.50496
ENSG00000198793	MTOR	25.8545
ENSG00000107951	MTPAP	9.69296
ENSG00000039123	MTREX	8.37844
ENSG00000120662	MTRF1	4.74275
ENSG00000112031	MTRF1L	5.20004
ENSG00000138823	MTTP	12.936
ENSG00000173171	MTX1	7.76458
ENSG00000128654	MTX2	24.4048
ENSG00000090432	MUL1	1.50823
ENSG00000172732	MUS81	8.73958
ENSG00000110921	MVK	7.6574
ENSG00000214114	MYCBP	10.9201
ENSG00000136449	MYCBPAP	90.9611
ENSG00000172936	MYD88	9.17842
ENSG00000133026	MYH10	3.36994
ENSG00000133392	MYH11	1.28141
ENSG00000109063	MYH3	17.3762
ENSG00000078814	MYH7B	2.07188
ENSG00000133020	MYH8	1.04467
ENSG00000100345	MYH9	1.55195
ENSG00000101608	MYL12A	13.2586
ENSG00000118680	MYL12B	26.1797
ENSG00000196465	MYL6B	75.8061
ENSG00000101335	MYL9	6.87137
ENSG00000197535	MYO5A	3.12449
ENSG00000167306	MYO5B	3.87261
ENSG00000196586	MYO6	3.11215
ENSG00000102030	NAA10	1.4389
ENSG00000156269	NAA11	21.5278
ENSG00000164134	NAA15	6.46826
ENSG00000172766	NAA16	6.65096
ENSG00000173418	NAA20	15.0304
ENSG00000111300	NAA25	3.67326
ENSG00000139977	NAA30	1.90734
ENSG00000135040	NAA35	7.93996
ENSG00000183011	NAA38	34.8068
ENSG00000121579	NAA50	7.61982
ENSG00000138386	NAB1	2.45546
ENSG00000139579	NABP2	4.93292
ENSG00000196531	NACA	62.623
ENSG00000253506	NACA2	30.6427
ENSG00000008130	NADK	4.56792
ENSG00000152620	NADK2	4.76363
ENSG00000159593	NAE1	15.7074
ENSG00000124357	NAGK	15.1241
ENSG00000170191	NANP	1.47296
ENSG00000105402	NAPA	21.6872
ENSG00000125814	NAPB	2.8252
ENSG00000134265	NAPG	2.50523
ENSG00000134440	NARS	8.50183
ENSG00000137513	NARS2	1.26378
ENSG00000132780	NASP	42.6798
ENSG00000109065	NAT9	5.08986
ENSG00000213995	NAXD	10.8943
ENSG00000163382	NAXE	12.5981
ENSG00000104320	NBN	1.41971
ENSG00000151503	NCAPD3	9.71918
ENSG00000109805	NCAPG	2.48985
ENSG00000121152	NCAPH	34.2274
ENSG00000025770	NCAPH2	5.54773
ENSG00000136937	NCBP1	9.13049
ENSG00000114503	NCBP2	5.9128
ENSG00000158092	NCK1	3.692
ENSG00000071051	NCK2	2.67864
ENSG00000061676	NCKAP1	4.24317
ENSG00000125912	NCLN	2.28812
ENSG00000140396	NCOA2	7.64192
ENSG00000124160	NCOA5	18.2311
ENSG00000198646	NCOA6	15.1405
ENSG00000162736	NCSTN	34.1385
ENSG00000080986	NDC80	9.01473
ENSG00000072864	NDE1	2.98541
ENSG00000166579	NDEL1	7.74996
ENSG00000131507	NDFIP1	3.10497
ENSG00000102471	NDFIP2	2.32093
ENSG00000188566	NDOR1	4.94965
ENSG00000070614	NDST1	3.54265
ENSG00000166507	NDST2	3.59944
ENSG00000130414	NDUFA10	10.7665
ENSG00000131495	NDUFA2	46.5132
ENSG00000128609	NDUFA5	7.56371
ENSG00000184983	NDUFA6	3.2192
ENSG00000267855	NDUFA7	31.7187
ENSG00000119421	NDUFA8	36.3825
ENSG00000139180	NDUFA9	9.14613
ENSG00000004779	NDUFAB1	25.3459
ENSG00000137806	NDUFAF1	8.72905
ENSG00000101247	NDUFAF5	11.0531
ENSG00000156170	NDUFAF6	6.17852
ENSG00000003509	NDUFAF7	27.4778
ENSG00000140990	NDUFB10	58.985
ENSG00000147123	NDUFB11	5.2965
ENSG00000090266	NDUFB2	28.9297
ENSG00000119013	NDUFB3	15.1957
ENSG00000136521	NDUFB5	15.1226
ENSG00000099795	NDUFB7	34.0731
ENSG00000166136	NDUFB8	40.9493
ENSG00000147684	NDUFB9	85.5704
ENSG00000158864	NDUFS2	12.9246
ENSG00000213619	NDUFS3	10.5338
ENSG00000164258	NDUFS4	9.29501
ENSG00000145494	NDUFS6	20.1928
ENSG00000115286	NDUFS7	22.6783
ENSG00000110717	NDUFS8	42.3988
ENSG00000167792	NDUFV1	49.2375
ENSG00000178127	NDUFV2	27.7347
ENSG00000089818	NECAP1	5.63749
ENSG00000139350	NEDD1	4.41669
ENSG00000049759	NEDD4L	1.23816
ENSG00000129559	NEDD8	14.1995
ENSG00000185049	NELFA	5.15918
ENSG00000101158	NELFCD	9.84222
ENSG00000204356	NELFE	9.82727
ENSG00000165525	NEMF	11.6965
ENSG00000196712	NF1	15.592
ENSG00000186575	NF2	3.31851
ENSG00000100906	NFKBIA	6.51464
ENSG00000170322	NFRKB	15.0244
ENSG00000244005	NFS1	17.5018
ENSG00000170448	NFXL1	13.7239
ENSG00000001167	NFYA	18.5411
ENSG00000120837	NFYB	4.35582
ENSG00000129460	NGDN	15.1098
ENSG00000151092	NGLY1	31.0484
ENSG00000196865	NHLRC2	3.69458
ENSG00000145912	NHP2	9.2764
ENSG00000196290	NIF3L1	7.43292
ENSG00000155438	NIFK	9.23681
ENSG00000131669	NINJ1	3.74897
ENSG00000132603	NIP7	2.95647
ENSG00000140157	NIPA2	3.72299
ENSG00000114021	NIT2	1.04924
ENSG00000189134	NKAPL	17.9448
ENSG00000197885	NKIRAS1	4.80928
ENSG00000168256	NKIRAS2	15.5153
ENSG00000073536	NLE1	1.58571
ENSG00000169251	NMD3	4.45978
ENSG00000239672	NME1	3.3476
ENSG00000143156	NME7	14.0566
ENSG00000086288	NME8	6.29232
ENSG00000181322	NME9	10.0217
ENSG00000136448	NMT1	13.2947
ENSG00000152465	NMT2	3.50998
ENSG00000084092	NOA1	6.67255
ENSG00000141101	NOB1	1.66135
ENSG00000188976	NOC2L	5.67579
ENSG00000173145	NOC3L	4.82393
ENSG00000165271	NOL6	4.32414
ENSG00000162408	NOL9	1.23267
ENSG00000146909	NOM1	1.15749
ENSG00000103512	NOMO1	3.09974
ENSG00000185164	NOMO2	5.52847
ENSG00000103226	NOMO3	3.17256
ENSG00000182117	NOP10	5.53286
ENSG00000087269	NOP14	1.29998
ENSG00000048162	NOP16	6.43645
ENSG00000105373	NOP53	9.25242
ENSG00000101361	NOP56	7.44058
ENSG00000055044	NOP58	3.29748
ENSG00000196943	NOP9	1.87615
ENSG00000134250	NOTCH2	9.27374
ENSG00000264343	NOTCH2NLA	12.0384
ENSG00000104967	NOVA2	1.37123
ENSG00000170485	NPAS2	3.40654
ENSG00000215440	NPEPL1	14.026
[truncated: 1,597 more rows]

## Sheet: Mouse
id	gene	TPM
ENSMUSG00000007777	0610009B22Rik	59.0356
ENSMUSG00000042208	0610010F05Rik	114.512
ENSMUSG00000021023	1110008L16Rik	5.34012
ENSMUSG00000035171	1110059E24Rik	18.8895
ENSMUSG00000028287	1700009N14Rik	78.4389
ENSMUSG00000037910	1700018B24Rik	869.66
ENSMUSG00000019797	1700021F05Rik	72.6762
ENSMUSG00000061633	1700029P11Rik	281.923
ENSMUSG00000074619	1700034I23Rik	11.2532
ENSMUSG00000078593	1700042G07Rik	8.379
ENSMUSG00000022507	1810013L24Rik	108.797
ENSMUSG00000020284	1810043G02Rik	16.1303
ENSMUSG00000044496	2510039O18Rik	10.8439
ENSMUSG00000025102	3110040N11Rik	23.4529
ENSMUSG00000059920	4930453N24Rik	531.214
ENSMUSG00000096405	4930474N05Rik	4.48856
ENSMUSG00000036463	4930544G11Rik	344.923
ENSMUSG00000041068	4930596D02Rik	9.86933
ENSMUSG00000031938	4931406C07Rik	25.5073
ENSMUSG00000078157	4931440F15Rik	8.01259
ENSMUSG00000079513	4932429P05Rik	2.83259
ENSMUSG00000037270	4932438A13Rik	44.175
ENSMUSG00000055357	4933400A11Rik	6.67413
ENSMUSG00000027942	4933434E20Rik	19.9825
ENSMUSG00000022195	6030458C11Rik	1.46705
ENSMUSG00000057230	Aak1	8.31259
ENSMUSG00000027628	Aar2	18.665
ENSMUSG00000031960	Aars	63.5802
ENSMUSG00000055923	Aasdh	11.8537
ENSMUSG00000025894	Aasdhppt	24.1244
ENSMUSG00000026198	Abcb6	22.1183
ENSMUSG00000028973	Abcb8	21.0631
ENSMUSG00000058355	Abce1	33.6298
ENSMUSG00000028953	Abcf2	143.271
ENSMUSG00000007036	Abhd16a	39.8074
ENSMUSG00000055882	Abhd16b	2.49363
ENSMUSG00000003346	Abhd17a	74.9813
ENSMUSG00000047368	Abhd17b	98.9171
ENSMUSG00000038459	Abhd17c	13.8889
ENSMUSG00000002475	Abhd3	11.4808
ENSMUSG00000040997	Abhd4	39.8362
ENSMUSG00000032540	Abhd5	67.0743
ENSMUSG00000058835	Abi1	7.12037
ENSMUSG00000026782	Abi2	3.14151
ENSMUSG00000026842	Abl1	11.6876
ENSMUSG00000026596	Abl2	3.87143
ENSMUSG00000036376	Abt1	3.86413
ENSMUSG00000036880	Acaa2	29.498
ENSMUSG00000020532	Acaca	4.1793
ENSMUSG00000027710	Acad9	6.3564
ENSMUSG00000062908	Acadm	14.2285
ENSMUSG00000029545	Acads	2.65925
ENSMUSG00000030861	Acadsb	18.6898
ENSMUSG00000018574	Acadvl	22.9018
ENSMUSG00000032047	Acat1	24.397
ENSMUSG00000023832	Acat2	11.1108
ENSMUSG00000062480	Acat3	3.92494
ENSMUSG00000033701	Acbd6	87.0219
ENSMUSG00000038007	Acer2	10.9858
ENSMUSG00000022185	Acin1	128.9
ENSMUSG00000020917	Acly	19.4183
ENSMUSG00000028405	Aco1	1.65924
ENSMUSG00000022477	Aco2	126.122
ENSMUSG00000006717	Acot13	5.74967
ENSMUSG00000020777	Acox1	10.9569
ENSMUSG00000032110	Acrv1	80.3979
ENSMUSG00000015016	Acsf3	8.49118
ENSMUSG00000029580	Actb	160.025
ENSMUSG00000062825	Actg1	569.593
ENSMUSG00000059430	Actg2	33.1796
ENSMUSG00000027671	Actl6a	132.178
ENSMUSG00000054808	Actn4	6.76114
ENSMUSG00000021076	Actr10	138.898
ENSMUSG00000025228	Actr1a	275.231
ENSMUSG00000037351	Actr1b	16.8082
ENSMUSG00000020152	Actr2	10.1394
ENSMUSG00000026341	Actr3	27.2007
ENSMUSG00000037761	Actr5	13.5909
ENSMUSG00000015971	Actr8	77.4747
ENSMUSG00000026836	Acvr1	2.68737
ENSMUSG00000000532	Acvr1b	7.61288
ENSMUSG00000008822	Acyp1	330.265
ENSMUSG00000027259	Adal	11.6044
ENSMUSG00000054693	Adam10	3.2954
ENSMUSG00000052593	Adam17	7.66312
ENSMUSG00000066113	Adamtsl1	1.64896
ENSMUSG00000020262	Adarb1	2.95863
ENSMUSG00000022550	Adck5	9.35464
ENSMUSG00000028138	Adh5	19.0614
ENSMUSG00000020629	Adi1	3.59019
ENSMUSG00000039197	Adk	10.0119
ENSMUSG00000057134	Ado	5.15868
ENSMUSG00000025236	Adpgk	1.37658
ENSMUSG00000039041	Adrm1	77.5532
ENSMUSG00000022407	Adsl	61.22
ENSMUSG00000015961	Adss	148.555
ENSMUSG00000049470	Aff4	11.5433
ENSMUSG00000038302	Afg1l	4.20732
ENSMUSG00000024527	Afg3l2	41.2439
ENSMUSG00000049659	Aftph	50.1601
ENSMUSG00000029916	Agk	9.69285
ENSMUSG00000033400	Agl	2.80069
ENSMUSG00000041530	Ago1	1.00406
ENSMUSG00000036698	Ago2	2.02168
ENSMUSG00000042500	Ago4	11.9623
ENSMUSG00000001211	Agpat3	124.001
ENSMUSG00000023827	Agpat4	1.164
ENSMUSG00000042410	Agps	1.09676
ENSMUSG00000021557	Agtpbp1	135.886
ENSMUSG00000027597	Ahcy	11.0773
ENSMUSG00000028029	Aimp1	158.965
ENSMUSG00000029610	Aimp2	6.43236
ENSMUSG00000024847	Aip	5.16763
ENSMUSG00000026817	Ak1	60.7775
ENSMUSG00000028792	Ak2	115.476
ENSMUSG00000018428	Akap1	40.315
ENSMUSG00000040407	Akap9	5.71397
ENSMUSG00000028692	Akr1a1	81.8061
ENSMUSG00000061758	Akr1b10	2.1162
ENSMUSG00000001642	Akr1b3	100.542
ENSMUSG00000029762	Akr1b8	30.2701
ENSMUSG00000001729	Akt1	14.0846
ENSMUSG00000004056	Akt2	17.9362
ENSMUSG00000019699	Akt3	12.1472
ENSMUSG00000031667	Aktip	41.2117
ENSMUSG00000028393	Alad	6.32244
ENSMUSG00000032786	Alas1	88.9151
ENSMUSG00000035561	Aldh1b1	4.08555
ENSMUSG00000029455	Aldh2	39.8981
ENSMUSG00000019102	Aldh3a1	4.36112
ENSMUSG00000010025	Aldh3a2	14.4427
ENSMUSG00000024885	Aldh3b1	13.7096
ENSMUSG00000075296	Aldh3b2	8.19745
ENSMUSG00000021238	Aldh6a1	6.01362
ENSMUSG00000053644	Aldh7a1	8.64614
ENSMUSG00000030695	Aldoa	112.863
ENSMUSG00000059343	Aldoart1	13.6635
ENSMUSG00000063129	Aldoart2	39.6499
ENSMUSG00000017390	Aldoc	4.62601
ENSMUSG00000039427	Alg1	7.31392
ENSMUSG00000075470	Alg10b	2.80029
ENSMUSG00000063362	Alg11	5.76802
ENSMUSG00000039740	Alg2	7.6272
ENSMUSG00000033809	Alg3	6.04495
ENSMUSG00000036632	Alg5	6.81114
ENSMUSG00000035704	Alg8	22.3477
ENSMUSG00000042831	Alkbh6	10.0902
ENSMUSG00000002661	Alkbh7	19.8476
ENSMUSG00000025899	Alkbh8	2.29458
ENSMUSG00000026024	Als2	10.9942
ENSMUSG00000075232	Amd1	35.9836
ENSMUSG00000063953	Amd2	17.8281
ENSMUSG00000036820	Amdhd2	64.1303
ENSMUSG00000041915	Ammecr1l	115.238
ENSMUSG00000014355	Anapc1	12.0605
ENSMUSG00000036977	Anapc10	14.6781
ENSMUSG00000025135	Anapc11	61.9664
ENSMUSG00000026965	Anapc2	22.6956
ENSMUSG00000029176	Anapc4	28.7921
ENSMUSG00000029472	Anapc5	50.8936
ENSMUSG00000021257	Angel1	108.219
ENSMUSG00000026634	Angel2	28.5826
ENSMUSG00000032826	Ank2	3.97039
ENSMUSG00000069601	Ank3	1.57869
ENSMUSG00000029501	Ankle2	46.8184
ENSMUSG00000036188	Ankmy2	1.17928
ENSMUSG00000021661	Ankra2	27.9219
ENSMUSG00000035569	Ankrd11	64.7945
ENSMUSG00000034647	Ankrd12	22.6594
ENSMUSG00000044864	Ankrd50	1.31148
ENSMUSG00000033055	Ankrd54	509.915
ENSMUSG00000024219	Anks1	3.20005
ENSMUSG00000058589	Anks1b	3.97901
ENSMUSG00000021814	Anxa7	28.1831
ENSMUSG00000009090	Ap1b1	33.392
ENSMUSG00000031731	Ap1g1	15.7968
ENSMUSG00000003033	Ap1m1	208.518
ENSMUSG00000031367	Ap1s2	1.8943
ENSMUSG00000060279	Ap2a1	50.7353
ENSMUSG00000002957	Ap2a2	11.2671
ENSMUSG00000035152	Ap2b1	137.878
ENSMUSG00000022841	Ap2m1	28.0526
ENSMUSG00000008036	Ap2s1	127.676
ENSMUSG00000021686	Ap3b1	94.4944
ENSMUSG00000020198	Ap3d1	50.1562
ENSMUSG00000021824	Ap3m1	9.30443
ENSMUSG00000031539	Ap3m2	1.93407
ENSMUSG00000063801	Ap3s2	5.74963
ENSMUSG00000005871	Apc	1.86607
ENSMUSG00000035960	Apex1	23.4196
ENSMUSG00000015750	Aph1a	1.1707
ENSMUSG00000032375	Aph1b	1.44258
ENSMUSG00000053040	Aph1c	5.78091
ENSMUSG00000027193	Api5	60.2854
ENSMUSG00000010911	Apip	54.3467
ENSMUSG00000030051	Aplf	5.13936
ENSMUSG00000033096	Apmap	3.29301
ENSMUSG00000006589	Aprt	149.316
ENSMUSG00000040383	Aqr	23.7402
ENSMUSG00000001127	Araf	1.79633
ENSMUSG00000032096	Arcn1	62.0266
ENSMUSG00000042350	Arel1	16.921
ENSMUSG00000048076	Arf1	250.605
ENSMUSG00000062421	Arf2	19.6336
ENSMUSG00000051853	Arf3	19.5981
ENSMUSG00000021877	Arf4	35.1916
ENSMUSG00000020440	Arf5	32.9845
ENSMUSG00000044147	Arf6	27.6189
ENSMUSG00000027575	Arfgap1	20.7033
ENSMUSG00000027255	Arfgap2	45.4627
ENSMUSG00000054277	Arfgap3	88.1875
ENSMUSG00000067851	Arfgef1	33.6505
ENSMUSG00000074582	Arfgef2	16.2758
ENSMUSG00000074513	Arfip1	4.73011
ENSMUSG00000030881	Arfip2	5.13328
ENSMUSG00000038671	Arfrp1	33.7837
ENSMUSG00000037148	Arhgap10	16.8284
ENSMUSG00000039031	Arhgap18	2.4961
ENSMUSG00000025154	Arhgap19	51.7641
ENSMUSG00000036591	Arhgap21	1.09884
ENSMUSG00000049807	Arhgap23	8.04713
ENSMUSG00000024043	Arhgap28	1.52094
ENSMUSG00000058230	Arhgap35	14.7468
ENSMUSG00000035133	Arhgap5	62.2222
ENSMUSG00000025132	Arhgdia	31.7433
ENSMUSG00000071176	Arhgef10	12.6059
ENSMUSG00000040964	Arhgef10l	6.33658
ENSMUSG00000041977	Arhgef11	10.3593
ENSMUSG00000059495	Arhgef12	4.19623
ENSMUSG00000031133	Arhgef6	3.92261
ENSMUSG00000031511	Arhgef7	26.6004
ENSMUSG00000007880	Arid1a	11.9738
ENSMUSG00000033237	Arid2	77.4794
ENSMUSG00000025234	Arih1	50.586
ENSMUSG00000064145	Arih2	116.196
ENSMUSG00000060904	Arl1	67.0141
ENSMUSG00000027122	Arl14ep	77.9845
ENSMUSG00000024944	Arl2	8.77778
ENSMUSG00000025035	Arl3	1048.94
ENSMUSG00000017418	Arl5b	7.44494
ENSMUSG00000030654	Arl6ip1	207.484
ENSMUSG00000035199	Arl6ip5	8.03648
ENSMUSG00000037683	Armc3	125.735
ENSMUSG00000061802	Armc4	29.5123
ENSMUSG00000002343	Armc6	2.81179
ENSMUSG00000039901	Armh3	6.57759
ENSMUSG00000015522	Arnt	13.3801
ENSMUSG00000055116	Arntl	1.35392
ENSMUSG00000029621	Arpc1a	89.2775
ENSMUSG00000029622	Arpc1b	4.51547
ENSMUSG00000006304	Arpc2	170.11
ENSMUSG00000029465	Arpc3	21.9477
ENSMUSG00000079426	Arpc4	10.9591
ENSMUSG00000008475	Arpc5	5.03593
ENSMUSG00000026755	Arpc5l	178.162
ENSMUSG00000007656	Arpp19	35.7465
ENSMUSG00000031982	Arv1	7.87083
ENSMUSG00000022377	Asap1	41.9634
ENSMUSG00000044475	Ascc1	57.6363
ENSMUSG00000020412	Ascc2	74.4256
ENSMUSG00000038774	Ascc3	14.0375
ENSMUSG00000019857	Asf1a	27.9357
ENSMUSG00000005470	Asf1b	29.3633
ENSMUSG00000028053	Ash1l	7.36723
ENSMUSG00000031575	Ash2l	219.249
ENSMUSG00000052456	Asna1	52.0431
ENSMUSG00000029752	Asns	16.8681
ENSMUSG00000028207	Asph	1.87854
ENSMUSG00000025142	Aspscr1	146.631
ENSMUSG00000076441	Ass1	50.0808
ENSMUSG00000037486	Asxl2	22.4861
ENSMUSG00000010796	Asz1	77.2765
ENSMUSG00000030850	Ate1	34.3695
ENSMUSG00000030213	Atf7ip	21.4828
ENSMUSG00000037204	Atg101	6.23654
ENSMUSG00000032905	Atg12	32.2494
ENSMUSG00000027244	Atg13	22.0014
ENSMUSG00000037526	Atg14	5.39292
ENSMUSG00000026289	Atg16l1	2.75289
ENSMUSG00000024773	Atg2a	7.1721
ENSMUSG00000041341	Atg2b	9.22015
ENSMUSG00000022663	Atg3	44.7942
ENSMUSG00000026280	Atg4b	16.4457
ENSMUSG00000028550	Atg4c	28.0408
ENSMUSG00000002820	Atg4d	9.11404
ENSMUSG00000030314	Atg7	25.8033
ENSMUSG00000033124	Atg9a	42.3653
ENSMUSG00000026192	Atic	1.78273
ENSMUSG00000021066	Atl1	37.1413
ENSMUSG00000059811	Atl2	35.8252
ENSMUSG00000034218	Atm	1.12267
ENSMUSG00000047388	Atmin	18.7043
ENSMUSG00000025324	Atp10a	4.13452
ENSMUSG00000031862	Atp13a1	8.54244
ENSMUSG00000019943	Atp2b1	1.07926
ENSMUSG00000032570	Atp2c1	6.5825
ENSMUSG00000025428	Atp5a1	80.7014
ENSMUSG00000025393	Atp5b	450.871
ENSMUSG00000025781	Atp5c1	270.945
ENSMUSG00000003072	Atp5d	98.2963
ENSMUSG00000000563	Atp5f1	120.775
ENSMUSG00000006057	Atp5g1	9.09454
ENSMUSG00000034566	Atp5h	322.818
ENSMUSG00000022890	Atp5j	423.373
ENSMUSG00000038690	Atp5j2	121.351
ENSMUSG00000022956	Atp5o	273.83
ENSMUSG00000019087	Atp6ap1	4.06313
ENSMUSG00000031007	Atp6ap2	4.23175
ENSMUSG00000024121	Atp6v0c	32.9513
ENSMUSG00000013160	Atp6v0d1	38.3849
ENSMUSG00000052459	Atp6v1a	56.3541
ENSMUSG00000006269	Atp6v1b1	1.55164
ENSMUSG00000006273	Atp6v1b2	24.6396
ENSMUSG00000022295	Atp6v1c1	44.9995
ENSMUSG00000021114	Atp6v1d	127.574
ENSMUSG00000019210	Atp6v1e1	75.7435
ENSMUSG00000004285	Atp6v1f	56.4803
ENSMUSG00000039105	Atp6v1g1	175.578
ENSMUSG00000024403	Atp6v1g2	8.67143
ENSMUSG00000033793	Atp6v1h	117.189
ENSMUSG00000021983	Atp8a2	4.26363
ENSMUSG00000060671	Atp8b2	1.40013
ENSMUSG00000028457	Atp8b5	65.6733
ENSMUSG00000027546	Atp9a	15.0739
ENSMUSG00000024566	Atp9b	46.6849
ENSMUSG00000028710	Atpaf1	7.89794
ENSMUSG00000042709	Atpaf2	99.5172
ENSMUSG00000027312	Atrn	1.50893
ENSMUSG00000031229	Atrx	1.70462
ENSMUSG00000042605	Atxn2	51.4268
ENSMUSG00000032637	Atxn2l	367.048
ENSMUSG00000020564	Atxn7l1	33.6856
ENSMUSG00000059995	Atxn7l3	16.2229
ENSMUSG00000078584	AU022252	6.35389
ENSMUSG00000021460	Auh	3.96406
ENSMUSG00000071649	B3gat3	3.22917
ENSMUSG00000028413	B4galt1	4.0024
ENSMUSG00000001039	B9d1	68.2843
ENSMUSG00000024392	Bag6	243.02
ENSMUSG00000024844	Banf1	32.66
ENSMUSG00000021901	Bap1	57.9057
ENSMUSG00000035021	Baz1a	119.939
ENSMUSG00000040054	Baz2a	60.6227
ENSMUSG00000079065	BC005561	3.92863
ENSMUSG00000026851	BC005624	55.219
ENSMUSG00000064063	BC048507	21.1034
ENSMUSG00000040282	BC052040	1.80818
ENSMUSG00000002015	Bcap31	12.0177
ENSMUSG00000005687	Bcas2	246.008
ENSMUSG00000059439	Bcas3	27.023
ENSMUSG00000030983	Bccip	18.9741
ENSMUSG00000060376	Bckdha	24.5879
ENSMUSG00000032263	Bckdhb	1.75489
ENSMUSG00000049658	Bdp1	2.66057
ENSMUSG00000035086	Becn1	65.3373
ENSMUSG00000037933	Bicd2	7.50632
ENSMUSG00000041609	Bicdl1	7.21927
ENSMUSG00000067787	Blcap	8.25384
ENSMUSG00000030528	Blm	19.5936
ENSMUSG00000020840	Blmh	12.7546
ENSMUSG00000090247	Bloc1s1	53.6743
ENSMUSG00000057506	Bloc1s2	99.1184
ENSMUSG00000026577	Blzf1	51.7357
ENSMUSG00000026739	Bmi1	26.6211
ENSMUSG00000034663	Bmp2k	5.09969
ENSMUSG00000021796	Bmpr1a	2.88096
ENSMUSG00000030138	Bms1	161.636
ENSMUSG00000024191	Bnip1	71.3272
ENSMUSG00000078566	Bnip3	7.60672
ENSMUSG00000015943	Bola1	25.7421
ENSMUSG00000025977	Boll	142.135
ENSMUSG00000022557	Bop1	19.0079
ENSMUSG00000042992	Borcs5	3.98426
ENSMUSG00000026617	Bpnt1	19.8054
ENSMUSG00000040481	Bptf	36.8349
ENSMUSG00000002413	Braf	8.91039
ENSMUSG00000029458	Brap	141.182
ENSMUSG00000041147	Brca2	20.8721
ENSMUSG00000022387	Brd1	29.5755
ENSMUSG00000024335	Brd2	151.592
ENSMUSG00000026918	Brd3	107.159
ENSMUSG00000031660	Brd7	90.8665
ENSMUSG00000003778	Brd8	48.3323
ENSMUSG00000011158	Brf1	55.6399
ENSMUSG00000047843	Bri3	17.5551
ENSMUSG00000022247	Brix1	40.0675
ENSMUSG00000033940	Brk1	38.9908
ENSMUSG00000012076	Brms1l	5.755
ENSMUSG00000001632	Brpf1	8.23419
ENSMUSG00000063952	Brpf3	38.0663
ENSMUSG00000022914	Brwd1	20.0787
ENSMUSG00000025103	Btbd1	328.077
ENSMUSG00000002803	Btbd6	3.35997
ENSMUSG00000028568	Btf3l4	179.235
ENSMUSG00000025217	Btrc	132.374
ENSMUSG00000027379	Bub1	34.3669
ENSMUSG00000066979	Bub3	57.3941
ENSMUSG00000005378	Bud23	35.2604
ENSMUSG00000038722	Bud31	301.481
ENSMUSG00000023988	Bysl	20.4028
ENSMUSG00000020547	Bzw2	1.19141
ENSMUSG00000042460	C1galt1	10.4532
ENSMUSG00000018446	C1qbp	53.7262
ENSMUSG00000045975	C2cd2	14.053
ENSMUSG00000030279	C2cd5	10.53
ENSMUSG00000028578	Caap1	7.01486
ENSMUSG00000036707	Cab39	88.878
ENSMUSG00000021981	Cab39l	65.9496
ENSMUSG00000015968	Cacna1d	2.72017
ENSMUSG00000013629	Cad	1.94247
ENSMUSG00000001175	Calm1	806.513
ENSMUSG00000036438	Calm2	2189.26
ENSMUSG00000019370	Calm3	814.761
ENSMUSG00000003814	Calr	740.233
ENSMUSG00000029767	Calu	12.8666
ENSMUSG00000030272	Camk1	1.17164
ENSMUSG00000053819	Camk2d	1.03977
ENSMUSG00000071037	Camkmt	11.3551
ENSMUSG00000014592	Camta1	7.67695
ENSMUSG00000040712	Camta2	4.02342
ENSMUSG00000020114	Cand1	109.699
ENSMUSG00000025575	Cant1	32.55
ENSMUSG00000020368	Canx	116.836
ENSMUSG00000027184	Caprin1	125.469
ENSMUSG00000070372	Capza1	146.634
ENSMUSG00000015733	Capza2	53.7015
ENSMUSG00000028745	Capzb	160.707
ENSMUSG00000027562	Car2	10.7498
ENSMUSG00000024726	Carnmt1	15.7596
ENSMUSG00000056228	Cars2	2.32155
ENSMUSG00000078676	Casc3	24.1279
ENSMUSG00000073650	Catip	59.3833
ENSMUSG00000038533	Cbfa2t2	8.50765
ENSMUSG00000034342	Cbl	26.4115
ENSMUSG00000022637	Cblb	22.3485
ENSMUSG00000020659	Cbll1	36.1528
ENSMUSG00000020930	Ccdc103	29.1616
ENSMUSG00000036598	Ccdc113	956.796
ENSMUSG00000040189	Ccdc114	42.9195
ENSMUSG00000079235	Ccdc13	135.708
ENSMUSG00000004994	Ccdc130	84.8892
ENSMUSG00000034083	Ccdc174	90.3754
ENSMUSG00000035173	Ccdc186	25.2034
ENSMUSG00000022035	Ccdc25	14.9135
ENSMUSG00000027676	Ccdc39	567.151
ENSMUSG00000039963	Ccdc40	161.766
ENSMUSG00000045915	Ccdc42	300.798
ENSMUSG00000020925	Ccdc43	10.8523
ENSMUSG00000078622	Ccdc47	27.2586
ENSMUSG00000075229	Ccdc58	40.4326
ENSMUSG00000043036	Ccdc63	75.402
ENSMUSG00000084883	Ccdc85c	19.4928
ENSMUSG00000024732	Ccdc86	16.0674
ENSMUSG00000032740	Ccdc88a	94.3867
ENSMUSG00000002608	Ccdc97	52.6244
ENSMUSG00000041431	Ccnb1	54.0843
ENSMUSG00000032218	Ccnb2	255.875
ENSMUSG00000028252	Ccnc	22.3731
ENSMUSG00000002068	Ccne1	9.28618
ENSMUSG00000028212	Ccne2	23.9367
ENSMUSG00000021548	Ccnh	35.4164
ENSMUSG00000021258	Ccnk	226.7
ENSMUSG00000011960	Ccnt1	3.98057
ENSMUSG00000026349	Ccnt2	3.85273
ENSMUSG00000024286	Ccny	21.8831
ENSMUSG00000070871	Ccnyl1	75.8206
ENSMUSG00000033904	Ccp110	180.541
ENSMUSG00000034024	Cct2	316.085
ENSMUSG00000001416	Cct3	577.651
ENSMUSG00000007739	Cct4	556.63
ENSMUSG00000022234	Cct5	890.758
ENSMUSG00000029447	Cct6a	202.858
ENSMUSG00000020698	Cct6b	707.564
ENSMUSG00000030007	Cct7	653.935
ENSMUSG00000025613	Cct8	315.956
ENSMUSG00000029617	Ccz1	121.987
ENSMUSG00000042502	Cd2bp2	28.6699
ENSMUSG00000025351	Cd63	43.4117
ENSMUSG00000027284	Cdan1	19.0627
ENSMUSG00000033502	Cdc14a	38.4496
ENSMUSG00000038416	Cdc16	16.1734
ENSMUSG00000006398	Cdc20	101.731
ENSMUSG00000024370	Cdc23	15.9734
ENSMUSG00000020687	Cdc27	50.735
ENSMUSG00000020307	Cdc34	61.8208
ENSMUSG00000020870	Cdc34b	5.48701
ENSMUSG00000019471	Cdc37	27.1568
ENSMUSG00000038446	Cdc40	8.53269
ENSMUSG00000006699	Cdc42	29.1252
ENSMUSG00000026490	Cdc42bpa	9.07915
ENSMUSG00000021279	Cdc42bpb	3.83171
ENSMUSG00000052298	Cdc42se2	12.5677
ENSMUSG00000023932	Cdc5l	70.8652
ENSMUSG00000029283	Cdc7	20.6407
ENSMUSG00000026361	Cdc73	11.9031
ENSMUSG00000030682	Cdipt	5.65608
ENSMUSG00000019942	Cdk1	50.8747
ENSMUSG00000033862	Cdk10	68.0501
ENSMUSG00000003119	Cdk12	23.1959
ENSMUSG00000041297	Cdk13	31.8172
ENSMUSG00000028926	Cdk14	7.13385
ENSMUSG00000031065	Cdk16	9.88409
ENSMUSG00000020015	Cdk17	27.4197
ENSMUSG00000026437	Cdk18	1.07759
ENSMUSG00000025358	Cdk2	80.4902
ENSMUSG00000027487	Cdk5rap1	5.49752
ENSMUSG00000039298	Cdk5rap2	96.1213
ENSMUSG00000018669	Cdk5rap3	130.713
ENSMUSG00000009555	Cdk9	61.1547
ENSMUSG00000029330	Cds1	90.4361
ENSMUSG00000058793	Cds2	2.86905
ENSMUSG00000059288	Cdyl	15.9482
ENSMUSG00000031758	Cdyl2	3.53467
ENSMUSG00000024081	Cebpz	77.8872
ENSMUSG00000005506	Celf1	8.37776
ENSMUSG00000002107	Celf2	1.41562
ENSMUSG00000045328	Cenpe	55.4227
ENSMUSG00000064128	Cenpj	19.4263
ENSMUSG00000039781	Cep131	36.9087
ENSMUSG00000036403	Cep135	17.6409
ENSMUSG00000068394	Cep152	4.86969
ENSMUSG00000019971	Cep290	176.162
ENSMUSG00000023072	Cep89	91.8782
ENSMUSG00000022604	Cep97	10.094
ENSMUSG00000040774	Cept1	1.73672
ENSMUSG00000035891	Cerk	29.8704
ENSMUSG00000015714	Cers2	10.8535
ENSMUSG00000023021	Cers5	5.40276
ENSMUSG00000050996	Cetn1	1345.28
ENSMUSG00000031347	Cetn2	4.55381
ENSMUSG00000045031	Cetn4	1298.29
ENSMUSG00000048794	Cfap100	21.6271
ENSMUSG00000028294	Cfap206	986.217
ENSMUSG00000022972	Cfap298	902.571
ENSMUSG00000026546	Cfap45	405.659
ENSMUSG00000020904	Cfap52	121.292
ENSMUSG00000037143	Cfap61	34.5983
ENSMUSG00000031954	Cfdp1	118.498
ENSMUSG00000020309	Chac2	10.4243
ENSMUSG00000022945	Chaf1b	13.2916
ENSMUSG00000078671	Chd2	4.37089
ENSMUSG00000018474	Chd3	14.4692
ENSMUSG00000063870	Chd4	100.985
ENSMUSG00000005045	Chd5	14.6224
ENSMUSG00000032113	Chek1	3.40155
ENSMUSG00000052488	Cherp	39.3947
ENSMUSG00000029229	Chic2	119.441
ENSMUSG00000025512	Chid1	17.1246
ENSMUSG00000024843	Chka	171.743
ENSMUSG00000022617	Chkb	33.8681
ENSMUSG00000033916	Chmp2a	383.134
ENSMUSG00000004843	Chmp2b	435.782
ENSMUSG00000053119	Chmp3	97.1354
ENSMUSG00000038467	Chmp4b	172.44
ENSMUSG00000028419	Chmp5	31.7629
ENSMUSG00000025371	Chmp6	66.826
ENSMUSG00000001774	Chordc1	12.5861
ENSMUSG00000014077	Chp1	31.9765
ENSMUSG00000060002	Chpt1	36.1427
ENSMUSG00000025199	Chuk	13.5427
ENSMUSG00000003662	Ciao1	11.262
ENSMUSG00000031879	Ciao2b	23.0678
ENSMUSG00000031781	Ciapin1	139.237
ENSMUSG00000041777	Cir1	68.9336
ENSMUSG00000029516	Cit	14.6225
ENSMUSG00000040549	Ckap5	29.1048
ENSMUSG00000028044	Cks1b	7.19107
ENSMUSG00000062248	Cks2	164.747
ENSMUSG00000064302	Clasp1	8.92807
ENSMUSG00000033392	Clasp2	7.25968
ENSMUSG00000061028	Clasrp	24.3195
ENSMUSG00000068663	Clec16a	14.6718
ENSMUSG00000049550	Clip1	76.7327
ENSMUSG00000026034	Clk1	62.783
ENSMUSG00000029238	Clock	3.47128
ENSMUSG00000002660	Clpp	10.6435
ENSMUSG00000002981	Clptm1	40.2323
ENSMUSG00000021610	Clptm1l	109.844
ENSMUSG00000015357	Clpx	140.391
ENSMUSG00000028478	Clta	17.4751
ENSMUSG00000047126	Cltc	109.407
ENSMUSG00000024644	Cndp2	34.8502
ENSMUSG00000036810	Cnep1r1	17.0293
ENSMUSG00000037408	Cnnm4	14.4235
ENSMUSG00000036550	Cnot1	167.055
ENSMUSG00000056167	Cnot10	57.0142
ENSMUSG00000003135	Cnot11	15.8316
ENSMUSG00000020166	Cnot2	76.4435
ENSMUSG00000020362	Cnot6	31.0257
ENSMUSG00000034724	Cnot6l	1.94034
ENSMUSG00000031601	Cnot7	87.1711
ENSMUSG00000020515	Cnot8	18.6996
ENSMUSG00000026174	Cnot9	36.3231
ENSMUSG00000033159	Cnppd1	43.9948
ENSMUSG00000025381	Cnpy2	8.28424
ENSMUSG00000023973	Cnpy3	22.0599
ENSMUSG00000017188	Coa3	25.1563
ENSMUSG00000018661	Cog1	31.2319
ENSMUSG00000031979	Cog2	24.2402
ENSMUSG00000034893	Cog3	22.2844
ENSMUSG00000031753	Cog4	106.583
ENSMUSG00000035933	Cog5	28.4384
ENSMUSG00000027742	Cog6	208.018
ENSMUSG00000034951	Cog7	42.4244
ENSMUSG00000031916	Cog8	28.9734
ENSMUSG00000022483	Col2a1	14.3959
ENSMUSG00000021669	Col4a3bp	28.5688
ENSMUSG00000034807	Colgalt1	2.86135
ENSMUSG00000036513	Commd2	10.1374
ENSMUSG00000051154	Commd3	55.279
ENSMUSG00000032299	Commd4	5.41179
ENSMUSG00000055041	Commd5	14.1442
ENSMUSG00000026553	Copa	66.2105
ENSMUSG00000030754	Copb1	46.3171
ENSMUSG00000032458	Copb2	53.9869
ENSMUSG00000055681	Cope	46.7656
ENSMUSG00000030058	Copg1	39.0528
ENSMUSG00000025607	Copg2	56.8167
ENSMUSG00000027206	Cops2	85.4031
ENSMUSG00000019373	Cops3	342.412
ENSMUSG00000035297	Cops4	410.98
ENSMUSG00000025917	Cops5	328.734
ENSMUSG00000019494	Cops6	130.105
ENSMUSG00000030127	Cops7a	188.341
ENSMUSG00000026240	Cops7b	8.58234
ENSMUSG00000034432	Cops8	59.7442
ENSMUSG00000060992	Copz1	64.407
ENSMUSG00000041733	Coq5	29.6158
ENSMUSG00000021235	Coq6	7.01102
ENSMUSG00000030652	Coq7	12.2177
ENSMUSG00000031782	Coq9	84.5972
ENSMUSG00000042148	Cox10	12.8869
ENSMUSG00000020544	Cox11	46.5144
ENSMUSG00000040018	Cox15	1.12919
ENSMUSG00000014313	Cox6c	446.716
ENSMUSG00000017778	Cox7c	96.7407
ENSMUSG00000020841	Cpd	5.5127
ENSMUSG00000025586	Cpeb1	3.96859
ENSMUSG00000039782	Cpeb2	61.7939
ENSMUSG00000041781	Cpsf2	28.4745
ENSMUSG00000054309	Cpsf3	58.7934
ENSMUSG00000029625	Cpsf4	23.7447
ENSMUSG00000055531	Cpsf6	27.3334
ENSMUSG00000029073	Cptp	62.601
ENSMUSG00000026853	Crat	323.297
ENSMUSG00000005362	Crbn	121.048
ENSMUSG00000025532	Crcp	208.672
ENSMUSG00000025958	Creb1	6.91469
ENSMUSG00000022521	Crebbp	3.75289
ENSMUSG00000032652	Crebl2	3.05666
ENSMUSG00000048249	Crebrf	28.6155
ENSMUSG00000023272	Creld2	204.804
ENSMUSG00000024146	Cript	110.458
ENSMUSG00000017776	Crk	36.4365
ENSMUSG00000006134	Crkl	9.34922
ENSMUSG00000027357	Crls1	53.0602
ENSMUSG00000001767	Crnkl1	46.7156
ENSMUSG00000020038	Cry1	44.4451
ENSMUSG00000068742	Cry2	15.4176
ENSMUSG00000005683	Cs	26.6691
ENSMUSG00000023044	Csad	2.42043
ENSMUSG00000002718	Cse1l	32.0681
ENSMUSG00000046934	Csl	268.606
ENSMUSG00000074698	Csnk2a1	4.14027
ENSMUSG00000046707	Csnk2a2	62.5947
ENSMUSG00000024387	Csnk2b	1338.37
ENSMUSG00000027498	Cstf1	53.209
ENSMUSG00000031256	Cstf2	7.87358
ENSMUSG00000053536	Cstf2t	26.0658
ENSMUSG00000027176	Cstf3	45.8801
ENSMUSG00000037373	Ctbp1	9.6166
ENSMUSG00000030970	Ctbp2	28.8634
ENSMUSG00000018559	Ctdnep1	31.6528
ENSMUSG00000033323	Ctdp1	25.1497
ENSMUSG00000037815	Ctnna1	7.86408
ENSMUSG00000063063	Ctnna2	2.76871
ENSMUSG00000006932	Ctnnb1	36.7629
ENSMUSG00000027649	Ctnnbl1	123.194
ENSMUSG00000005609	Ctr9	52.3906
ENSMUSG00000021939	Ctsb	12.4943
ENSMUSG00000007891	Ctsd	25.1696
ENSMUSG00000031078	Cttn	13.2794
ENSMUSG00000062127	Cttnbp2nl	6.31776
ENSMUSG00000029686	Cul1	152.126
ENSMUSG00000024231	Cul2	19.5658
ENSMUSG00000004364	Cul3	391.072
ENSMUSG00000031446	Cul4a	67.5841
ENSMUSG00000031095	Cul4b	25.7589
ENSMUSG00000032030	Cul5	71.2867
ENSMUSG00000024194	Cuta	6.69767
ENSMUSG00000025193	Cutc	76.2298
ENSMUSG00000004096	Cwc15	404.131
ENSMUSG00000027014	Cwc22	10.454
ENSMUSG00000018541	Cwc25	6.81525
ENSMUSG00000024560	Cxxc1	47.9351
ENSMUSG00000019590	Cyb561	4.24527
ENSMUSG00000024646	Cyb5a	64.0425
ENSMUSG00000031924	Cyb5b	25.9274
ENSMUSG00000057778	Cyb5d2	9.88821
ENSMUSG00000026456	Cyb5r1	1.54606
ENSMUSG00000048065	Cyb5r2	10.2269
ENSMUSG00000018042	Cyb5r3	16.4964
ENSMUSG00000032872	Cyb5r4	25.5815
ENSMUSG00000022551	Cyc1	11.0672
ENSMUSG00000063694	Cycs	6.78021
ENSMUSG00000056436	Cyct	215.633
ENSMUSG00000030447	Cyfip1	1.09237
ENSMUSG00000017132	Cyth1	10.5189
ENSMUSG00000003269	Cyth2	155.541
ENSMUSG00000018001	Cyth3	8.11543
ENSMUSG00000028608	Czib	75.1193
ENSMUSG00000034574	Daam1	21.4255
ENSMUSG00000040260	Daam2	1.1269
ENSMUSG00000026883	Dab2ip	3.70686
ENSMUSG00000055639	Dach1	1.13132
ENSMUSG00000022174	Dad1	140.35
ENSMUSG00000039952	Dag1	5.64536
ENSMUSG00000019039	Dalrd3	53.7447
ENSMUSG00000039168	Dap	46.6122
ENSMUSG00000068921	Dap3	270.819
ENSMUSG00000026356	Dars	127.904
ENSMUSG00000026709	Dars2	2.90453
ENSMUSG00000002307	Daxx	135.994
ENSMUSG00000069565	Dazap1	189.939
ENSMUSG00000002297	Dbf4	100.908
ENSMUSG00000026385	Dbi	296.279
ENSMUSG00000020476	Dbnl	29.0974
ENSMUSG00000035572	Dcaf10	8.8458
ENSMUSG00000022214	Dcaf11	37.8033
ENSMUSG00000022300	Dcaf13	31.034
ENSMUSG00000037103	Dcaf15	78.6505
ENSMUSG00000049106	Dcaf5	29.5005
ENSMUSG00000049354	Dcaf7	51.4927
ENSMUSG00000020935	Dcakd	12.8185
ENSMUSG00000024472	Dcp2	2.24867
ENSMUSG00000031865	Dctn1	47.971
ENSMUSG00000025410	Dctn2	427.417
ENSMUSG00000024603	Dctn4	56.4236
ENSMUSG00000030868	Dctn5	60.9363
ENSMUSG00000031516	Dctn6	98.1959
ENSMUSG00000027708	Dcun1d1	242.881
ENSMUSG00000038506	Dcun1d2	2.94668
ENSMUSG00000039450	Dcxr	1.2185
ENSMUSG00000074247	Dda1	30.3439
ENSMUSG00000024740	Ddb1	147.524
ENSMUSG00000028757	Ddost	57.9564
ENSMUSG00000068290	Ddrgk1	53.9198
ENSMUSG00000037149	Ddx1	227.443
ENSMUSG00000053289	Ddx10	25.3871
ENSMUSG00000015023	Ddx19a	11.6243
ENSMUSG00000033658	Ddx19b	67.3068
ENSMUSG00000027905	Ddx20	156.565
ENSMUSG00000003360	Ddx23	32.5143
ENSMUSG00000017999	Ddx27	29.836
ENSMUSG00000005481	Ddx39	134.388
ENSMUSG00000019432	Ddx39b	75.9477
ENSMUSG00000020705	Ddx42	37.3525
ENSMUSG00000057788	Ddx49	48.2432
ENSMUSG00000020719	Ddx5	1207.39
ENSMUSG00000032097	Ddx6	24.8874
ENSMUSG00000058886	Deaf1	12.6264
ENSMUSG00000038633	Degs1	3.98606
ENSMUSG00000053641	Dennd4a	3.67325
ENSMUSG00000042404	Dennd4b	4.79611
ENSMUSG00000038024	Dennd4c	10.9957
ENSMUSG00000030313	Dennd5b	14.3577
ENSMUSG00000040818	Dennd6a	1.39557
ENSMUSG00000015377	Dennd6b	8.61767
ENSMUSG00000023106	Denr	87.7863
ENSMUSG00000037426	Depdc5	9.50608
ENSMUSG00000030225	Dera	3.56925
ENSMUSG00000022365	Derl1	15.6097
ENSMUSG00000018442	Derl2	52.53
ENSMUSG00000030610	Det1	4.39982
ENSMUSG00000030747	Dgat2	24.1403
ENSMUSG00000022718	Dgcr8	5.95742
ENSMUSG00000070738	Dgkd	95.6226
ENSMUSG00000000276	Dgke	3.48208
ENSMUSG00000034731	Dgkh	9.42454
ENSMUSG00000012117	Dhdds	18.587
ENSMUSG00000031730	Dhodh	2.65226
ENSMUSG00000022210	Dhrs4	97.1961
ENSMUSG00000021094	Dhrs7	10.1181
ENSMUSG00000042569	Dhrs7b	17.4594
ENSMUSG00000029169	Dhx15	98.9361
ENSMUSG00000024422	Dhx16	56.3296
ENSMUSG00000027770	Dhx36	24.2926
ENSMUSG00000037993	Dhx38	39.1122
ENSMUSG00000042699	Dhx9	53.5426
ENSMUSG00000024456	Diaph1	21.9561
ENSMUSG00000041415	Dicer1	2.70448
ENSMUSG00000053333	Dis3l2	11.4835
ENSMUSG00000000168	Dlat	57.3406
ENSMUSG00000020664	Dld	162.493
ENSMUSG00000022770	Dlg1	8.68064
ENSMUSG00000000881	Dlg3	1.72329
ENSMUSG00000021782	Dlg5	2.56768
ENSMUSG00000004789	Dlst	139.132
ENSMUSG00000057229	Dmac2	43.6128
ENSMUSG00000054894	Dmac2l	66.9583
ENSMUSG00000009640	Dmap1	80.1133
ENSMUSG00000020973	Dnaaf2	60.3364
ENSMUSG00000055809	Dnaaf3	52.2027
ENSMUSG00000092192	Dnaaf4	117.31
ENSMUSG00000025857	Dnaaf5	15.4127
ENSMUSG00000021879	Dnah12	34.5761
ENSMUSG00000052273	Dnah3	3.82741
ENSMUSG00000052861	Dnah6	23.836
ENSMUSG00000033826	Dnah8	252.649
ENSMUSG00000061322	Dnaic1	96.3962
ENSMUSG00000034706	Dnaic2	72.4116
ENSMUSG00000005483	Dnajb1	246.077
ENSMUSG00000004460	Dnajb11	238.67
ENSMUSG00000030708	Dnajb13	93.9941
ENSMUSG00000081984	Dnajb3	727.056
ENSMUSG00000028035	Dnajb4	127.406
ENSMUSG00000036052	Dnajb5	9.34966
ENSMUSG00000029131	Dnajb6	730.666
ENSMUSG00000039768	Dnajc11	24.1199
ENSMUSG00000032560	Dnajc13	10.1474
ENSMUSG00000025354	Dnajc14	16.4115
ENSMUSG00000022013	Dnajc15	275.197
ENSMUSG00000040697	Dnajc16	7.10811
ENSMUSG00000034278	Dnajc17	9.39905
ENSMUSG00000027679	Dnajc19	13.1713
ENSMUSG00000029014	Dnajc2	455.093
ENSMUSG00000022136	Dnajc3	32.1611
ENSMUSG00000000826	Dnajc5	8.15462
ENSMUSG00000027606	Dnajc5b	48.3968
ENSMUSG00000014195	Dnajc7	223.184
ENSMUSG00000054405	Dnajc8	153.906
ENSMUSG00000042523	Dnal1	37.5066
ENSMUSG00000042707	Dnali1	151.75
ENSMUSG00000026825	Dnm1	11.1834
ENSMUSG00000022789	Dnm1l	32.788
ENSMUSG00000033335	Dnm2	133.502
ENSMUSG00000040265	Dnm3	28.3749
ENSMUSG00000020143	Dock2	4.76267
ENSMUSG00000075419	Dolk	1.56036
ENSMUSG00000034973	Dop1a	15.2135
ENSMUSG00000022946	Dop1b	5.38176
ENSMUSG00000032123	Dpagt1	1.14586
ENSMUSG00000078789	Dph1	1.71546
ENSMUSG00000028540	Dph2	1.6781
ENSMUSG00000021905	Dph3	59.6151
ENSMUSG00000033554	Dph5	15.7479
ENSMUSG00000078919	Dpm1	117.564
ENSMUSG00000042737	Dpm3	3.69372
ENSMUSG00000073102	Drc1	223.541
ENSMUSG00000031786	Drc7	92.7802
ENSMUSG00000020457	Drg1	121.19
ENSMUSG00000020537	Drg2	37.9331
ENSMUSG00000026131	Dst	17.4608
ENSMUSG00000015932	Dstn	22.4617
ENSMUSG00000026281	Dtymk	79.3768
ENSMUSG00000025155	Dus1l	54.6036
ENSMUSG00000007603	Dus3l	15.0774
ENSMUSG00000026659	Dusp12	1.22875
ENSMUSG00000069255	Dusp22	43.6764
ENSMUSG00000027203	Dut	69.3704
ENSMUSG00000029071	Dvl1	87.168
ENSMUSG00000020888	Dvl2	16.0072
ENSMUSG00000003233	Dvl3	2.14914
ENSMUSG00000018707	Dync1h1	84.1861
ENSMUSG00000029757	Dync1i1	3.89602
ENSMUSG00000027012	Dync1i2	307.218
ENSMUSG00000032435	Dync1li1	13.6358
ENSMUSG00000035770	Dync1li2	90.4357
ENSMUSG00000047193	Dync2h1	41.4706
ENSMUSG00000009013	Dynll1	138.597
ENSMUSG00000020483	Dynll2	46.7448
ENSMUSG00000047459	Dynlrb1	6.2978
ENSMUSG00000034467	Dynlrb2	154.229
ENSMUSG00000022897	Dyrk1a	10.6676
ENSMUSG00000002409	Dyrk1b	193.465
ENSMUSG00000030345	Dyrk4	7.7535
ENSMUSG00000039244	E130309D02Rik	15.2506
ENSMUSG00000014859	E2f4	29.8508
ENSMUSG00000027552	E2f5	8.59766
ENSMUSG00000022838	Eaf2	3.70096
ENSMUSG00000030871	Ears2	3.8107
ENSMUSG00000028729	Ebna1bp2	148.493
ENSMUSG00000053898	Ech1	61.1826
ENSMUSG00000025465	Echs1	11.4425
ENSMUSG00000066839	Ecsit	6.65382
ENSMUSG00000027699	Ect2	30.9016
ENSMUSG00000038957	Edc3	12.5441
ENSMUSG00000036270	Edc4	54.2938
ENSMUSG00000038312	Edem2	18.2029
ENSMUSG00000043019	Edem3	3.87302
ENSMUSG00000015092	Edf1	112.617
ENSMUSG00000037742	Eef1a1	1855.52
ENSMUSG00000026694	Eef1aknmt	2.54337
ENSMUSG00000025967	Eef1b2	93.068
ENSMUSG00000055762	Eef1d	146.165
ENSMUSG00000001707	Eef1e1	4.25282
ENSMUSG00000071644	Eef1g	86.6077
ENSMUSG00000034994	Eef2	744.696
ENSMUSG00000022544	Eef2kmt	12.4913
ENSMUSG00000026495	Efcab2	143.489
ENSMUSG00000038563	Efl1	14.6878
ENSMUSG00000015002	Efr3a	40.5035
ENSMUSG00000020929	Eftud2	108.664
ENSMUSG00000058709	Egln2	297.917
ENSMUSG00000042302	Ehbp1	60.9383
ENSMUSG00000024772	Ehd1	44.3098
ENSMUSG00000035530	Eif1	399.359
ENSMUSG00000024841	Eif1ad	39.8571
ENSMUSG00000027810	Eif2a	6.01452
ENSMUSG00000005102	Eif2ak4	2.28105
ENSMUSG00000029388	Eif2b1	56.4305
ENSMUSG00000004788	Eif2b2	18.6573
ENSMUSG00000028683	Eif2b3	10.1714
ENSMUSG00000029145	Eif2b4	50.0455
ENSMUSG00000003235	Eif2b5	126.584
ENSMUSG00000026427	Eif2d	16.4218
ENSMUSG00000021116	Eif2s1	118.98
ENSMUSG00000074656	Eif2s2	268.684
ENSMUSG00000035150	Eif2s3x	1.43563
ENSMUSG00000069049	Eif2s3y	13.3891
ENSMUSG00000024991	Eif3a	135.063
ENSMUSG00000056076	Eif3b	365.006
ENSMUSG00000030738	Eif3c	305.123
ENSMUSG00000016554	Eif3d	150.307
ENSMUSG00000022336	Eif3e	390.651
ENSMUSG00000031029	Eif3f	65.7939
ENSMUSG00000070319	Eif3g	437.86
ENSMUSG00000022312	Eif3h	241.251
ENSMUSG00000028798	Eif3i	221.103
ENSMUSG00000053565	Eif3k	297.243
ENSMUSG00000033047	Eif3l	195.013
ENSMUSG00000027170	Eif3m	166.607
ENSMUSG00000059796	Eif4a1	89.7217
ENSMUSG00000022884	Eif4a2	160.684
ENSMUSG00000025580	Eif4a3	107.604
ENSMUSG00000058655	Eif4b	50.7325
ENSMUSG00000028156	Eif4e	201.553
ENSMUSG00000026254	Eif4e2	197.355
ENSMUSG00000020091	Eif4ebp2	8.39131
ENSMUSG00000045983	Eif4g1	31.9515
ENSMUSG00000005610	Eif4g2	171.923
ENSMUSG00000028760	Eif4g3	146.064
ENSMUSG00000027613	Eif6	28.9653
ENSMUSG00000036613	Eipr1	10.1291
ENSMUSG00000020549	Elac2	42.5485
ENSMUSG00000040028	Elavl1	24.4898
ENSMUSG00000028668	Eloa	31.6439
ENSMUSG00000055839	Elob	393.898
ENSMUSG00000079658	Eloc	169.906
ENSMUSG00000024271	Elp2	30.353
ENSMUSG00000022031	Elp3	19.9569
ENSMUSG00000027167	Elp4	3.42478
ENSMUSG00000078517	Emc1	5.54862
ENSMUSG00000022337	Emc2	129.282
ENSMUSG00000030286	Emc3	62.3105
ENSMUSG00000027131	Emc4	38.1674
ENSMUSG00000047260	Emc6	37.0782
ENSMUSG00000055943	Emc7	12.5618
ENSMUSG00000031819	Emc8	17.3395
ENSMUSG00000022217	Emc9	1.31909
ENSMUSG00000039055	Eme1	3.97183
ENSMUSG00000004268	Emg1	47.6189
ENSMUSG00000022995	Enah	39.6036
ENSMUSG00000026679	Enkur	335.467
ENSMUSG00000063524	Eno1	406.223
ENSMUSG00000059040	Eno1b	58.1573
ENSMUSG00000060600	Eno3	175.212
ENSMUSG00000029326	Enoph1	16.6829
ENSMUSG00000038619	Ensa	77.2838
ENSMUSG00000021236	Entpd5	10.386
ENSMUSG00000033068	Entpd6	108.026
ENSMUSG00000026927	Entr1	193.574
ENSMUSG00000022338	Eny2	74.8083
ENSMUSG00000035245	Eogt	1.36039
ENSMUSG00000055024	Ep300	4.81834
ENSMUSG00000029505	Ep400	88.019
ENSMUSG00000027624	Epb41l1	1.05318
ENSMUSG00000019978	Epb41l2	35.2919
ENSMUSG00000024044	Epb41l3	5.25265
ENSMUSG00000026383	Epb41l5	8.9548
ENSMUSG00000024240	Epc1	35.1338
ENSMUSG00000069495	Epc2	12.3129
ENSMUSG00000035203	Epn1	30.6723
ENSMUSG00000001036	Epn2	24.1396
ENSMUSG00000026615	Eprs	57.7376
ENSMUSG00000028552	Eps15	101.713
ENSMUSG00000006276	Eps15l1	4.98151
ENSMUSG00000020832	Eral1	14.5058
ENSMUSG00000030400	Ercc2	23.0933
ENSMUSG00000024382	Ercc3	36.0003
ENSMUSG00000026048	Ercc5	6.25302
ENSMUSG00000030304	Ergic2	87.2354
ENSMUSG00000005881	Ergic3	171.102
ENSMUSG00000021131	Erh	217.141
ENSMUSG00000021831	Ero1l	5.98855
ENSMUSG00000057069	Ero1lb	100.991
ENSMUSG00000028343	Erp44	52.6207
ENSMUSG00000021996	Esd	3.5838
ENSMUSG00000045624	Esf1	25.5458
ENSMUSG00000024360	Etf1	64.2397
ENSMUSG00000032314	Etfa	18.5996
ENSMUSG00000004610	Etfb	30.9387
ENSMUSG00000027809	Etfdh	17.913
ENSMUSG00000040370	Etfrf1	16.351
ENSMUSG00000030275	Etnk1	44.8814
ENSMUSG00000070644	Etnk2	2.71588
ENSMUSG00000011832	Evi5l	76.0522
ENSMUSG00000032705	Exd2	31.7366
ENSMUSG00000036435	Exoc1	18.6852
ENSMUSG00000021357	Exoc2	26.9207
ENSMUSG00000034152	Exoc3	37.9147
ENSMUSG00000029763	Exoc4	2.39973
ENSMUSG00000061244	Exoc5	6.85347
ENSMUSG00000053799	Exoc6	2.59504
ENSMUSG00000033769	Exoc6b	7.84527
ENSMUSG00000020792	Exoc7	69.998
ENSMUSG00000074030	Exoc8	13.5176
ENSMUSG00000034321	Exosc1	26.1285
ENSMUSG00000017264	Exosc10	122.601
ENSMUSG00000028322	Exosc3	254.632
ENSMUSG00000034259	Exosc4	5.79288
ENSMUSG00000025785	Exosc7	12.5571
ENSMUSG00000027714	Exosc9	83.0663
ENSMUSG00000027198	Ext2	6.34247
ENSMUSG00000010461	Eya4	9.82787
ENSMUSG00000006920	Ezh1	7.26806
ENSMUSG00000029687	Ezh2	96.6778
ENSMUSG00000027533	Fabp5	4.25373
ENSMUSG00000010517	Faf1	67.6756
ENSMUSG00000025873	Faf2	23.2595
ENSMUSG00000030630	Fah	1.72596
ENSMUSG00000045316	Fahd1	17.3107
ENSMUSG00000027371	Fahd2a	35.1595
ENSMUSG00000039157	Fam102a	2.651
ENSMUSG00000038174	Fam126b	4.07343
ENSMUSG00000044465	Fam160a2	15.1574
ENSMUSG00000031774	Fam192a	66.5155
ENSMUSG00000038121	Fam210a	1.5685
ENSMUSG00000022378	Fam49b	23.8512
ENSMUSG00000001962	Fam50a	2.63321
ENSMUSG00000002017	Fam98a	116.413
ENSMUSG00000027349	Fam98b	58.3882
ENSMUSG00000034023	Fancd2	31.6597
ENSMUSG00000039187	Fanci	19.5154
ENSMUSG00000004018	Fancl	11.285
ENSMUSG00000055884	Fancm	4.20698
ENSMUSG00000053111	Fank1	441.556
ENSMUSG00000021420	Fars2	71.8564
ENSMUSG00000003808	Farsa	52.506
ENSMUSG00000026245	Farsb	72.6299
ENSMUSG00000038274	Fau	227.45
ENSMUSG00000046865	Fbl	18.887
ENSMUSG00000024598	Fbn2	10.8734
ENSMUSG00000020883	Fbxl20	4.20175
ENSMUSG00000005371	Fbxo11	13.215
ENSMUSG00000047539	Fbxo28	7.09009
ENSMUSG00000035329	Fbxo33	12.073
ENSMUSG00000028920	Fbxo42	7.84443
ENSMUSG00000040913	Fbxw4	4.81668
ENSMUSG00000015095	Fbxw5	285.387
ENSMUSG00000021243	Fcf1	61.5005
ENSMUSG00000041685	Fcho2	8.7107
ENSMUSG00000059743	Fdps	48.7694
ENSMUSG00000032051	Fdx1	166.951
ENSMUSG00000018861	Fdxr	16.3627
ENSMUSG00000024588	Fech	14.9895
ENSMUSG00000043683	Fem1a	4.39249
ENSMUSG00000032244	Fem1b	65.4196
ENSMUSG00000033319	Fem1c	90.8499
ENSMUSG00000000127	Fer	49.3163
ENSMUSG00000037712	Fermt2	3.0992
ENSMUSG00000056121	Fez2	2.1883
ENSMUSG00000040242	Fgfr1op2	410.23
ENSMUSG00000030849	Fgfr2	1.36687
ENSMUSG00000054252	Fgfr3	2.75734
ENSMUSG00000005320	Fgfr4	2.34472
ENSMUSG00000028573	Fggy	1.41145
ENSMUSG00000026526	Fh1	4.66634
ENSMUSG00000024911	Fibp	39.3181
ENSMUSG00000053334	Ficd	1.10269
ENSMUSG00000038417	Fig4	8.53029
ENSMUSG00000029227	Fip1l1	77.1342
ENSMUSG00000032966	Fkbp1a	377.232
ENSMUSG00000056629	Fkbp2	31.9705
ENSMUSG00000030357	Fkbp4	284.628
ENSMUSG00000024222	Fkbp5	8.97689
ENSMUSG00000019428	Fkbp8	75.5567
ENSMUSG00000042642	Flad1	20.5331
ENSMUSG00000032633	Flcn	13.6154
ENSMUSG00000002812	Flii	9.38642
ENSMUSG00000059714	Flot1	6.83153
ENSMUSG00000061981	Flot2	25.6471
ENSMUSG00000000838	Fmr1	4.22053
ENSMUSG00000075415	Fnbp1	1.64746
ENSMUSG00000039735	Fnbp1l	15.771
ENSMUSG00000033487	Fndc3a	65.8856
ENSMUSG00000035992	Fnip1	33.5358
ENSMUSG00000015994	Fnta	156.849
ENSMUSG00000033373	Fntb	2.12936
ENSMUSG00000034227	Foxj1	5.45632
ENSMUSG00000056493	Foxk1	5.65023
ENSMUSG00000039275	Foxk2	31.4982
ENSMUSG00000048285	Frmd6	1.04974
ENSMUSG00000070733	Fryl	6.25426
ENSMUSG00000024661	Fth1	444.527
ENSMUSG00000020706	Ftsj3	58.8906
ENSMUSG00000028034	Fubp1	30.8023
ENSMUSG00000026843	Fubp3	4.39757
ENSMUSG00000031198	Fundc2	2.72925
ENSMUSG00000030530	Furin	1.09249
ENSMUSG00000030795	Fus	113.831
ENSMUSG00000021065	Fut8	31.299
ENSMUSG00000027680	Fxr1	635.48
ENSMUSG00000018765	Fxr2	49.4324
ENSMUSG00000022297	Fzd6	1.01905
ENSMUSG00000020235	Fzr1	46.3172
ENSMUSG00000018583	G3bp1	25.4367
ENSMUSG00000029405	G3bp2	58.3954
ENSMUSG00000089992	G6pd2	7.63645
ENSMUSG00000031400	G6pdx	1.44084
ENSMUSG00000031714	Gab1	8.92129
ENSMUSG00000004508	Gab2	9.29158
ENSMUSG00000018567	Gabarap	312.625
ENSMUSG00000030161	Gabarapl1	43.2606
ENSMUSG00000024462	Gabbr1	6.52704
ENSMUSG00000033751	Gadd45gip1	14.84
ENSMUSG00000056880	Gadl1	1.66021
ENSMUSG00000062234	Gak	22.3374
ENSMUSG00000000420	Galnt1	2.52715
ENSMUSG00000038072	Galnt11	1.27951
ENSMUSG00000071650	Ganab	23.5327
ENSMUSG00000062646	Ganc	6.54799
ENSMUSG00000057666	Gapdh	1.29615
ENSMUSG00000061099	Gapdhs	224.908
ENSMUSG00000026867	Gapvd1	27.5415
ENSMUSG00000028010	Gar1	65.4334
ENSMUSG00000029777	Gars	63.495
ENSMUSG00000022962	Gart	9.33386
ENSMUSG00000034201	Gas2l1	8.9399
ENSMUSG00000040220	Gas8	113.065
ENSMUSG00000007415	Gatad1	84.9616
ENSMUSG00000036180	Gatad2a	12.9534
ENSMUSG00000028085	Gatb	16.7942
ENSMUSG00000028467	Gba2	54.1567
ENSMUSG00000022707	Gbe1	3.75598
ENSMUSG00000025224	Gbf1	72.0212
ENSMUSG00000029708	Gcc1	10.6407
ENSMUSG00000038039	Gcc2	12.11
ENSMUSG00000003809	Gcdh	2.01131
ENSMUSG00000032350	Gclc	44.689
ENSMUSG00000028124	Gclm	91.8281
ENSMUSG00000041638	Gcn1l1	29.1916
ENSMUSG00000033917	Gde1	113.368
ENSMUSG00000015291	Gdi1	2.82369
ENSMUSG00000021218	Gdi2	114.065
ENSMUSG00000060121	Gemin2	8.43964
ENSMUSG00000025858	Get4	35.6147
ENSMUSG00000027774	Gfm1	16.4619
ENSMUSG00000021666	Gfm2	16.5541
ENSMUSG00000013150	Gfod2	1.30987
ENSMUSG00000029992	Gfpt1	49.2674
ENSMUSG00000002797	Ggct	53.4652
ENSMUSG00000073987	Ggh	19.8579
ENSMUSG00000021302	Ggps1	16.6602
ENSMUSG00000006345	Ggt1	1.20464
ENSMUSG00000027603	Ggt7	12.8447
ENSMUSG00000027573	Gid8	38.5383
ENSMUSG00000029714	Gigyf1	2.80487
ENSMUSG00000048000	Gigyf2	29.213
ENSMUSG00000027454	Gins1	69.622
ENSMUSG00000031669	Gins3	2.6994
ENSMUSG00000019433	Gipc1	2.1264
ENSMUSG00000039131	Gipc2	30.5088
ENSMUSG00000011877	Git1	143.764
ENSMUSG00000041890	Git2	10.8082
ENSMUSG00000045594	Glb1	5.85097
ENSMUSG00000032252	Glce	1.22314
ENSMUSG00000019715	Gle1	16.067
ENSMUSG00000024026	Glo1	25.2583
ENSMUSG00000017286	Glod4	37.7638
ENSMUSG00000031068	Glrx3	715.213
ENSMUSG00000021102	Glrx5	5.87561
ENSMUSG00000026103	Gls	9.60836
ENSMUSG00000021794	Glud1	3.79125
ENSMUSG00000026473	Glul	63.9382
ENSMUSG00000057262	Gm10020	27.4542
ENSMUSG00000101523	Gm10031	1.69495
ENSMUSG00000058064	Gm10036	31.2068
ENSMUSG00000058905	Gm10051	34.9399
ENSMUSG00000058927	Gm10053	4.03886
ENSMUSG00000060019	Gm10073	30.7871
ENSMUSG00000061062	Gm10093	55.3497
ENSMUSG00000062038	Gm10108	5.45491
ENSMUSG00000064317	Gm10146	9.17719
ENSMUSG00000066878	Gm10184	145.264
ENSMUSG00000068706	Gm10250	110.736
ENSMUSG00000069117	Gm10260	36.5454
ENSMUSG00000066407	Gm10263	15.288
ENSMUSG00000091449	Gm10269	74.1185
ENSMUSG00000069622	Gm10273	14.3721
ENSMUSG00000092116	Gm10320	1.48751
ENSMUSG00000072789	Gm10420	6.49432
ENSMUSG00000074243	Gm10651	12.3711
ENSMUSG00000074479	Gm10704	71.4512
ENSMUSG00000074506	Gm10705	55.7331
ENSMUSG00000074516	Gm10709	15.6151
ENSMUSG00000078097	Gm10913	3.55987
ENSMUSG00000068240	Gm11808	123.457
ENSMUSG00000078134	Gm12355	21.8743
ENSMUSG00000041035	Gm17018	68.2533
ENSMUSG00000090460	Gm17511	7.12809
ENSMUSG00000091732	Gm17541	1.81428
ENSMUSG00000091695	Gm17669	9.15184
ENSMUSG00000043192	Gm1840	2.25888
ENSMUSG00000078193	Gm2000	121.066
ENSMUSG00000092232	Gm20521	1.15703
ENSMUSG00000101678	Gm29609	1.67872
ENSMUSG00000078240	Gm3550	1.78516
ENSMUSG00000096449	Gm4076	1.68977
ENSMUSG00000030653	Gm45837	4.04379
ENSMUSG00000048087	Gm4737	6.88002
ENSMUSG00000069379	Gm4950	5.5129
ENSMUSG00000062874	Gm4978	1.61201
ENSMUSG00000091742	Gm5093	9.89071
ENSMUSG00000071273	Gm5145	2.09826
ENSMUSG00000091198	Gm5218	1.31091
ENSMUSG00000062742	Gm5239	1.78171
ENSMUSG00000039684	Gm5422	26.6037
ENSMUSG00000094374	Gm5435	1.34814
ENSMUSG00000063543	Gm5616	12.6937
ENSMUSG00000069014	Gm5641	38.317
ENSMUSG00000066487	Gm5786	11.4393
ENSMUSG00000090451	Gm6133	3.10466
ENSMUSG00000051255	Gm6563	163.375
ENSMUSG00000090544	Gm6576	4.80709
ENSMUSG00000043346	Gm6741	1.09042
ENSMUSG00000092086	Gm6793	28.9143
ENSMUSG00000048185	Gm7075	1.55762
ENSMUSG00000055452	Gm7353	4.24721
ENSMUSG00000057036	Gm7536	266.256
ENSMUSG00000091460	Gm7808	77.3213
ENSMUSG00000063902	Gm7964	55.157
ENSMUSG00000049124	Gm8186	91.1694
ENSMUSG00000068604	Gm8225	1.68061
ENSMUSG00000050490	Gm8394	6.26366
ENSMUSG00000069439	Gm8444	3.88119
ENSMUSG00000059179	Gm8991	25.6614
ENSMUSG00000094973	Gm8994	2.77807
ENSMUSG00000096156	Gm9242	18.0262
ENSMUSG00000063328	Gm9396	9.10779
ENSMUSG00000030735	Gm9755	21.8631
ENSMUSG00000042165	Gm9774	32.3168
ENSMUSG00000045886	Gm9803	110.791
ENSMUSG00000096403	Gm9825	7.76109
ENSMUSG00000050299	Gm9843	51.3406
ENSMUSG00000062014	Gmfb	164.933
ENSMUSG00000060791	Gmfg	3.04651
ENSMUSG00000027823	Gmps	125.504
ENSMUSG00000034781	Gna11	14.3764
ENSMUSG00000000149	Gna12	18.2963
ENSMUSG00000020611	Gna13	19.8723
ENSMUSG00000057614	Gnai1	1.39705
ENSMUSG00000032562	Gnai2	32.2183
ENSMUSG00000000001	Gnai3	27.4783
ENSMUSG00000031748	Gnao1	20.6369
ENSMUSG00000024639	Gnaq	2.06304
ENSMUSG00000027523	Gnas	50.7552
ENSMUSG00000029064	Gnb1	72.8666
ENSMUSG00000029713	Gnb2	63.7079
ENSMUSG00000028869	Gnl2	188.24
ENSMUSG00000042354	Gnl3	58.4707
ENSMUSG00000031985	Gnpat	178.231
ENSMUSG00000052102	Gnpda1	25.5602
ENSMUSG00000029209	Gnpda2	22.7502
ENSMUSG00000034707	Gns	18.7274
ENSMUSG00000026754	Golga1	56.8063
ENSMUSG00000002546	Golga2	36.7021
ENSMUSG00000038708	Golga4	270.538
ENSMUSG00000015341	Golga7	45.4933
ENSMUSG00000022200	Golph3	27.952
ENSMUSG00000046519	Golph3l	23.3689
ENSMUSG00000032513	Gorasp1	8.48694
ENSMUSG00000014959	Gorasp2	216.712
ENSMUSG00000010392	Gosr1	29.1596
ENSMUSG00000025190	Got1	6.49694
ENSMUSG00000031672	Got2	2.35307
ENSMUSG00000022561	Gpaa1	4.31346
ENSMUSG00000024978	Gpam	1.51524
ENSMUSG00000092417	Gpank1	66.8509
ENSMUSG00000029314	Gpat3	9.05878
ENSMUSG00000031545	Gpat4	96.7829
ENSMUSG00000063808	Gpatch1	6.87125
ENSMUSG00000050668	Gpatch11	17.6285
ENSMUSG00000028069	Gpatch4	15.8644
ENSMUSG00000029510	Gpc2	4.81483
ENSMUSG00000031119	Gpc4	2.43953
ENSMUSG00000027346	Gpcpd1	33.1935
ENSMUSG00000036427	Gpi1	29.2732
ENSMUSG00000064037	Gpn1	11.1126
ENSMUSG00000028848	Gpn2	26.7318
ENSMUSG00000029464	Gpn3	24.9574
ENSMUSG00000000194	Gpr107	16.399
ENSMUSG00000025156	Gps1	174.123
ENSMUSG00000026930	Gpsm1	1.07107
ENSMUSG00000027883	Gpsm2	39.7687
ENSMUSG00000031700	Gpt2	14.7916
ENSMUSG00000059923	Grb2	6.95069
ENSMUSG00000035637	Grhpr	6.11404
ENSMUSG00000025892	Gria4	4.8525
ENSMUSG00000022564	Grina	186.38
ENSMUSG00000029198	Grpel1	37.6473
ENSMUSG00000039934	Gsap	1.21208
ENSMUSG00000026879	Gsn	15.9678
ENSMUSG00000062203	Gspt1	162.301
ENSMUSG00000071723	Gspt2	1.6968
ENSMUSG00000028018	Gstcd	5.03222
ENSMUSG00000021033	Gstz1	41.9406
ENSMUSG00000020962	Gtf2a1	20.4334
ENSMUSG00000033543	Gtf2a2	201.256
ENSMUSG00000028271	Gtf2b	166.282
ENSMUSG00000022828	Gtf2e1	35.869
ENSMUSG00000031585	Gtf2e2	408.929
ENSMUSG00000002658	Gtf2f1	188.778
ENSMUSG00000067995	Gtf2f2	113.085
ENSMUSG00000006599	Gtf2h1	198.558
ENSMUSG00000021639	Gtf2h2	56.997
ENSMUSG00000029387	Gtf2h3	13.1422
ENSMUSG00000016503	Gtf3a	6.78217
ENSMUSG00000032777	Gtf3c1	52.762
ENSMUSG00000023952	Gtpbp2	25.7435
ENSMUSG00000021149	Gtpbp4	28.6829
ENSMUSG00000022487	Gtsf1	805.339
ENSMUSG00000020444	Guk1	85.4789
ENSMUSG00000025534	Gusb	1.21367
ENSMUSG00000019188	H13	40.0103
ENSMUSG00000035376	Hacd2	9.51328
ENSMUSG00000021884	Hacl1	18.0554
ENSMUSG00000025745	Hadha	224.229
ENSMUSG00000059447	Hadhb	45.711
ENSMUSG00000024158	Hagh	388.474
ENSMUSG00000001380	Hars	61.4372
ENSMUSG00000027018	Hat1	52.4942
ENSMUSG00000038047	Haus6	11.0358
ENSMUSG00000019977	Hbs1l	99.789
ENSMUSG00000020246	Hcfc2	81.1753
ENSMUSG00000028800	Hdac1	182.379
ENSMUSG00000019777	Hdac2	44.9176
ENSMUSG00000026313	Hdac4	2.15224
ENSMUSG00000008855	Hdac5	5.76168
ENSMUSG00000000295	Hddc2	3.2923
ENSMUSG00000030532	Hddc3	6.723
ENSMUSG00000050244	Heatr1	22.7547
ENSMUSG00000031657	Heatr3	4.76446
ENSMUSG00000035247	Hectd1	24.8887
ENSMUSG00000041180	Hectd2	23.7651
ENSMUSG00000032579	Hemk1	18.7847
ENSMUSG00000045662	Henmt1	41.2423
ENSMUSG00000030451	Herc2	13.013
ENSMUSG00000029804	Herc3	1.56164
ENSMUSG00000020064	Herc4	70.4573
ENSMUSG00000031770	Herpud1	45.9654
ENSMUSG00000008429	Herpud2	16.7938
ENSMUSG00000048878	Hexim1	10.4755
ENSMUSG00000022554	Hgh1	35.178
ENSMUSG00000025793	Hgs	123.8
ENSMUSG00000037260	Hgsnat	2.03046
ENSMUSG00000029776	Hibadh	30.5391
ENSMUSG00000041426	Hibch	7.68063
ENSMUSG00000021109	Hif1a	3.32092
ENSMUSG00000062797	Hikeshi	1.36397
ENSMUSG00000019791	Hint3	46.6828
ENSMUSG00000039959	Hip1	2.95806
ENSMUSG00000000915	Hip1r	11.8511
ENSMUSG00000022702	Hira	7.94714
ENSMUSG00000037012	Hk1	359.025
ENSMUSG00000000628	Hk2	1.82741
ENSMUSG00000040820	Hlcs	1.21152
ENSMUSG00000030060	Hmces	6.27991
ENSMUSG00000032329	Hmg20a	8.36348
ENSMUSG00000066551	Hmgb1	11.5215
ENSMUSG00000028672	Hmgcl	7.27132
ENSMUSG00000007908	Hmgcll1	1.5107
ENSMUSG00000021670	Hmgcr	61.1328
ENSMUSG00000093930	Hmgcs1	42.0609
ENSMUSG00000027875	Hmgcs2	41.8123
ENSMUSG00000004070	Hmox2	312.848
ENSMUSG00000046434	Hnrnpa1	30.4497
ENSMUSG00000004980	Hnrnpa2b1	725.074
ENSMUSG00000059005	Hnrnpa3	36.6548
ENSMUSG00000060373	Hnrnpc	251.067
ENSMUSG00000042079	Hnrnpf	270.077
ENSMUSG00000007850	Hnrnph1	505.456
ENSMUSG00000045427	Hnrnph2	3.24079
ENSMUSG00000021546	Hnrnpk	392.441
ENSMUSG00000015165	Hnrnpl	241.664
ENSMUSG00000024095	Hnrnpll	112.09
ENSMUSG00000059208	Hnrnpm	244.85
ENSMUSG00000066037	Hnrnpr	58.601
ENSMUSG00000039630	Hnrnpu	207.614
ENSMUSG00000040725	Hnrnpul1	147.459
ENSMUSG00000037234	Hook3	8.19993
ENSMUSG00000025188	Hps1	1.05932
ENSMUSG00000042328	Hps4	20.4093
ENSMUSG00000025499	Hras	27.4361
ENSMUSG00000040151	Hs2st1	1.2924
ENSMUSG00000031839	Hsbp1	1337.29
ENSMUSG00000043510	Hscb	36.3389
ENSMUSG00000025260	Hsd17b10	8.70532
ENSMUSG00000027195	Hsd17b12	9.71916
ENSMUSG00000028383	Hsdl2	43.4214
ENSMUSG00000022556	Hsf1	15.8419
ENSMUSG00000021270	Hsp90aa1	2617.38
ENSMUSG00000023944	Hsp90ab1	196.552
ENSMUSG00000020048	Hsp90b1	1092.88
ENSMUSG00000091971	Hspa1a	2.88511
ENSMUSG00000090877	Hspa1b	2.29961
ENSMUSG00000007033	Hspa1l	53.5138
ENSMUSG00000059970	Hspa2	1225.37
ENSMUSG00000020361	Hspa4	422.79
ENSMUSG00000025757	Hspa4l	134.297
ENSMUSG00000026864	Hspa5	532.267
ENSMUSG00000015656	Hspa8	180.378
ENSMUSG00000024359	Hspa9	320.013
ENSMUSG00000004951	Hspb1	4.55017
ENSMUSG00000022849	Hspbap1	8.93293
ENSMUSG00000063802	Hspbp1	25.6801
ENSMUSG00000025980	Hspd1	19.9378
ENSMUSG00000073676	Hspe1	25.8695
ENSMUSG00000029657	Hsph1	70.3455
ENSMUSG00000067873	Htatsf1	6.11975
ENSMUSG00000025261	Huwe1	2.55283
ENSMUSG00000059854	Hydin	26.623
ENSMUSG00000032115	Hyou1	163.931
ENSMUSG00000037851	Iars	26.2719
ENSMUSG00000062995	Ica1	49.5953
ENSMUSG00000026018	Ica1l	131.158
ENSMUSG00000039662	Icmt	33.7954
ENSMUSG00000020644	Id2	5.02271
ENSMUSG00000025950	Idh1	40.0054
ENSMUSG00000030541	Idh2	5.02465
ENSMUSG00000032279	Idh3a	33.6275
ENSMUSG00000027406	Idh3b	84.9302
ENSMUSG00000002010	Idh3g	6.97431
ENSMUSG00000058258	Idi1	41.8685
ENSMUSG00000001627	Ifrd1	41.9748
ENSMUSG00000030323	Ift122	165.23
ENSMUSG00000024169	Ift140	266.931
ENSMUSG00000007867	Ift43	484.277
ENSMUSG00000040040	Ift88	68.0512
ENSMUSG00000031221	Igbp1	3.22927
ENSMUSG00000046717	Igbp1b	52.3293
ENSMUSG00000024474	Ik	611.44
ENSMUSG00000031537	Ikbkb	8.10083
ENSMUSG00000001016	Ilf2	79.9029
ENSMUSG00000030890	Ilk	8.29306
ENSMUSG00000042670	Immp1l	44.7699
ENSMUSG00000056899	Immp2l	70.7405
ENSMUSG00000052337	Immt	232.989
ENSMUSG00000032288	Imp3	20.9585
ENSMUSG00000026127	Imp4	9.97379
ENSMUSG00000027531	Impa1	36.2361
ENSMUSG00000066324	Impad1	7.83008
ENSMUSG00000003500	Impdh1	3.30619
ENSMUSG00000071041	Impdh2-ps	23.7142
ENSMUSG00000045969	Ing1	32.0904
ENSMUSG00000030330	Ing4	13.8543
ENSMUSG00000026283	Ing5	13.9184
ENSMUSG00000034154	Ino80	12.1187
ENSMUSG00000026102	Inpp1	4.09978
ENSMUSG00000026113	Inpp4a	2.71143
ENSMUSG00000026925	Inpp5e	24.2105
ENSMUSG00000006127	Inpp5k	107.94
ENSMUSG00000005534	Insr	1.35599
ENSMUSG00000029547	Ints1	11.6977
ENSMUSG00000031864	Ints10	193.386
ENSMUSG00000028016	Ints12	5.32016
ENSMUSG00000040250	Ints13	165.088
ENSMUSG00000034263	Ints14	27.5848
ENSMUSG00000018068	Ints2	6.31024
ENSMUSG00000027933	Ints3	5.18365
ENSMUSG00000035161	Ints6	70.5983
ENSMUSG00000032594	Ip6k1	64.0101
ENSMUSG00000060733	Ipmk	4.33399
ENSMUSG00000030662	Ipo5	316.423
ENSMUSG00000066232	Ipo7	25.2291
ENSMUSG00000040029	Ipo8	3.59951
ENSMUSG00000041879	Ipo9	17.5416
ENSMUSG00000028696	Ipp	22.4674
ENSMUSG00000034312	Iqsec1	11.5068
ENSMUSG00000046192	Iqub	90.474
ENSMUSG00000031392	Irak1	1.91126
ENSMUSG00000059883	Irak4	3.09429
ENSMUSG00000021241	Isca2	50.612
ENSMUSG00000025825	Iscu	127.535
ENSMUSG00000019139	Isyna1	179.931
ENSMUSG00000027598	Itch	17.913
ENSMUSG00000031703	Itfg1	47.2513
ENSMUSG00000025348	Itga7	1.21087
ENSMUSG00000025809	Itgb1	6.99491
ENSMUSG00000074797	Itpa	22.5396
ENSMUSG00000027296	Itpka	1.56426
ENSMUSG00000038855	Itpkb	3.92333
ENSMUSG00000003752	Itpkc	7.99157
ENSMUSG00000022957	Itsn1	8.88153
ENSMUSG00000020640	Itsn2	3.61048
ENSMUSG00000027332	Ivd	8.32085
ENSMUSG00000024384	Iws1	20.1206
ENSMUSG00000025764	Jade1	1.47246
ENSMUSG00000037315	Jade3	1.19748
ENSMUSG00000027276	Jag1	1.48311
ENSMUSG00000002799	Jag2	2.10747
ENSMUSG00000051256	Jagn1	44.5882
ENSMUSG00000028530	Jak1	8.48366
ENSMUSG00000024789	Jak2	2.33483
ENSMUSG00000031805	Jak3	4.68043
ENSMUSG00000063568	Jazf1	12.0395
ENSMUSG00000036819	Jmjd4	1.75255
ENSMUSG00000038695	Josd2	20.8121
ENSMUSG00000032702	Kank1	1.06351
ENSMUSG00000018412	Kansl1	19.7824
ENSMUSG00000022992	Kansl2	12.4303
ENSMUSG00000010453	Kansl3	118.966
ENSMUSG00000031948	Kars	84.1401
ENSMUSG00000020918	Kat2a	17.7795
ENSMUSG00000024926	Kat5	152.435
ENSMUSG00000031540	Kat6a	4.72537
ENSMUSG00000021767	Kat6b	7.2826
ENSMUSG00000038909	Kat7	251.418
ENSMUSG00000030801	Kat8	123.664
ENSMUSG00000019794	Katna1	15.2898
ENSMUSG00000041298	Katnal1	89.4196
ENSMUSG00000025420	Katnal2	142.808
ENSMUSG00000031787	Katnb1	59.2551
ENSMUSG00000016940	Kctd2	17.7735
ENSMUSG00000016946	Kctd5	13.3408
ENSMUSG00000034327	Kctd9	74.0261
ENSMUSG00000002778	Kdelr1	15.4042
ENSMUSG00000079111	Kdelr2	21.9687
ENSMUSG00000036940	Kdm1a	89.9795
ENSMUSG00000054611	Kdm2a	18.6946
ENSMUSG00000033326	Kdm4a	3.68207
ENSMUSG00000024201	Kdm4b	1.19569
ENSMUSG00000012443	Kif11	26.7193
ENSMUSG00000060012	Kif13b	6.02049
ENSMUSG00000041498	Kif14	3.80916
ENSMUSG00000038844	Kif16b	14.9334
ENSMUSG00000027115	Kif18a	21.5808
ENSMUSG00000051378	Kif18b	16.3394
ENSMUSG00000010021	Kif19a	23.2234
ENSMUSG00000063077	Kif1b	7.94235
ENSMUSG00000036955	Kif1bp	35.4736
ENSMUSG00000020821	Kif1c	2.11959
ENSMUSG00000022629	Kif21a	1.29978
ENSMUSG00000041642	Kif21b	4.44041
ENSMUSG00000032254	Kif23	42.5456
ENSMUSG00000021693	Kif2a	200.841
ENSMUSG00000028678	Kif2c	89.8095
ENSMUSG00000018395	Kif3a	109.924
ENSMUSG00000027475	Kif3b	171.416
ENSMUSG00000074657	Kif5a	1.61061
ENSMUSG00000006740	Kif5b	9.26199
ENSMUSG00000026764	Kif5c	2.79578
ENSMUSG00000026585	Kifap3	67.1424
ENSMUSG00000079553	Kifc1	10.8814
ENSMUSG00000031788	Kifc3	18.468
ENSMUSG00000024301	Kifc5b	9.24925
ENSMUSG00000021288	Klc1	10.0581
ENSMUSG00000003546	Klc4	12.4515
ENSMUSG00000029775	Klhdc10	18.4121
ENSMUSG00000040263	Klhdc4	8.77849
ENSMUSG00000031605	Klhl2	1.27354
ENSMUSG00000026705	Klhl20	5.19892
ENSMUSG00000014164	Klhl3	3.23379
ENSMUSG00000054920	Klhl5	3.43286
ENSMUSG00000006307	Kmt2b	20.4544
ENSMUSG00000038056	Kmt2c	3.07836
ENSMUSG00000029004	Kmt2e	20.9218
ENSMUSG00000022905	Kpna1	10.55
ENSMUSG00000018362	Kpna2	332.022
ENSMUSG00000003731	Kpna6	116.653
ENSMUSG00000038770	Kpna7	3.09859
ENSMUSG00000001440	Kpnb1	175.066
ENSMUSG00000030265	Kras	11.9979
ENSMUSG00000063334	Krr1	27.5223
ENSMUSG00000042747	Krtcap2	17.0612
ENSMUSG00000018334	Ksr1	2.05893
ENSMUSG00000055553	Kxd1	162.303
ENSMUSG00000039648	Kyat1	8.94415
ENSMUSG00000040213	Kyat3	2.35716
ENSMUSG00000019899	Lama2	5.03093
ENSMUSG00000002900	Lamb1	2.68624
ENSMUSG00000052911	Lamb2	2.20143
ENSMUSG00000031447	Lamp1	361.886
ENSMUSG00000028062	Lamtor2	52.4159
ENSMUSG00000091512	Lamtor3	5.44882
ENSMUSG00000039682	Lap3	31.9338
ENSMUSG00000020585	Laptm4a	119.483
ENSMUSG00000023025	Larp4	13.5531
ENSMUSG00000024493	Lars	27.1933
ENSMUSG00000057421	Las1l	3.58154
ENSMUSG00000040021	Lats1	2.25763
ENSMUSG00000021959	Lats2	9.22311
ENSMUSG00000032258	Lca5	12.2474
ENSMUSG00000030763	Lcmt1	29.3971
ENSMUSG00000025223	Ldb1	3.37322
ENSMUSG00000063229	Ldha	767.418
ENSMUSG00000101959	Ldhal6b	815.818
ENSMUSG00000030246	Ldhb	37.6958
ENSMUSG00000032193	Ldlr	2.07461
ENSMUSG00000048661	Lemd3	16.4187
ENSMUSG00000035545	Leng8	88.5375
ENSMUSG00000042487	Leo1	73.917
ENSMUSG00000035212	Leprot	2.94123
ENSMUSG00000031513	Leprotl1	5.73782
ENSMUSG00000005299	Letm1	36.2819
ENSMUSG00000029199	Lias	66.0543
ENSMUSG00000056394	Lig1	19.2141
ENSMUSG00000019920	Lims1	5.90416
ENSMUSG00000024395	Lims2	15.7188
ENSMUSG00000036845	Lin37	27.4868
ENSMUSG00000003872	Lin7b	3.26736
ENSMUSG00000027162	Lin7c	25.0538
ENSMUSG00000058729	Lin9	44.4999
ENSMUSG00000003123	Lipe	20.6485
ENSMUSG00000037216	Lipt1	8.41466
ENSMUSG00000020536	Llgl1	1.18227
ENSMUSG00000041891	Lman1	4.89571
ENSMUSG00000039704	Lmbrd2	2.05921
ENSMUSG00000022802	Lmln	3.9729
ENSMUSG00000028063	Lmna	11.1496
ENSMUSG00000024590	Lmnb1	13.1288
ENSMUSG00000062075	Lmnb2	29.8594
ENSMUSG00000009207	Lnpk	56.7412
ENSMUSG00000041168	Lonp1	8.67842
ENSMUSG00000004270	Lpcat3	146.458
ENSMUSG00000020593	Lpin1	38.9971
ENSMUSG00000024052	Lpin2	11.7024
ENSMUSG00000027412	Lpin3	1.71331
ENSMUSG00000034883	Lrr1	1.28218
ENSMUSG00000041679	Lrrc29	37.3932
ENSMUSG00000027702	Lrrc34	400.882
ENSMUSG00000063052	Lrrc40	6.31296
ENSMUSG00000020869	Lrrc59	81.5988
ENSMUSG00000022375	Lrrc6	134.921
ENSMUSG00000032497	Lrrfip2	362.82
ENSMUSG00000037296	Lsm1	14.8339
ENSMUSG00000020922	Lsm12	71.9418
ENSMUSG00000034192	Lsm3	385.643
ENSMUSG00000091625	Lsm5	12.0058
ENSMUSG00000031683	Lsm6	10.4253
ENSMUSG00000044155	Lsm8	42.3189
ENSMUSG00000015889	Lta4h	15.9238
ENSMUSG00000052299	Ltn1	30.9337
ENSMUSG00000019814	Ltv1	77.6674
ENSMUSG00000024188	Luc7l	22.0433
ENSMUSG00000029823	Luc7l2	213.86
ENSMUSG00000020863	Luc7l3	89.4914
ENSMUSG00000067367	Lyar	1730.43
ENSMUSG00000025903	Lypla1	23.1449
ENSMUSG00000039246	Lyplal1	1.16832
ENSMUSG00000046573	Lyrm4	4.54568
ENSMUSG00000035840	Lysmd3	9.5134
ENSMUSG00000019726	Lyst	1.36528
ENSMUSG00000022805	Maats1	60.6785
ENSMUSG00000028649	Macf1	2.95616
ENSMUSG00000028826	Maco1	73.7749
ENSMUSG00000029554	Mad1l1	18.9842
ENSMUSG00000029910	Mad2l1	10.1767
ENSMUSG00000029003	Mad2l2	235.093
ENSMUSG00000079562	Maea	81.8205
ENSMUSG00000040629	Mael	1061.23
ENSMUSG00000022553	Maf1	45.4509
ENSMUSG00000028609	Magoh	71.9349
ENSMUSG00000030188	Magohb	30.9234
ENSMUSG00000031232	Magt1	1.3587
ENSMUSG00000025971	Maip1	11.6542
ENSMUSG00000031578	Mak16	48.5394
ENSMUSG00000029815	Malsu1	15.8931
ENSMUSG00000008763	Man1a2	32.0427
ENSMUSG00000036646	Man1b1	65.4891
ENSMUSG00000024085	Man2a1	4.39082
ENSMUSG00000038886	Man2a2	13.1943
ENSMUSG00000032575	Manf	586.915
ENSMUSG00000027602	Map1lc3a	187.102
ENSMUSG00000033352	Map2k4	2.77954
ENSMUSG00000063358	Mapk1	17.5722
ENSMUSG00000046709	Mapk10	20.6557
ENSMUSG00000053137	Mapk11	3.8089
ENSMUSG00000053436	Mapk14	2.54733
ENSMUSG00000063704	Mapk15	51.9544
ENSMUSG00000063065	Mapk3	49.8702
ENSMUSG00000038696	Mapkap1	98.5079
ENSMUSG00000016528	Mapkapk2	6.87448
ENSMUSG00000033902	Mapkbp1	41.1438
ENSMUSG00000027479	Mapre1	21.2824
ENSMUSG00000029166	Mapre3	113.388
ENSMUSG00000073481	Marc2	15.0553
ENSMUSG00000023307	March5	11.5147
ENSMUSG00000025702	March8	2.09407
ENSMUSG00000060657	Marf1	12.7363
ENSMUSG00000007411	Mark3	12.3646
ENSMUSG00000040354	Mars	29.1682
ENSMUSG00000003810	Mast2	41.3864
ENSMUSG00000026779	Mastl	2.05475
ENSMUSG00000053907	Mat2a	18.9611
ENSMUSG00000024513	Mbd2	33.1346
ENSMUSG00000035478	Mbd3	165.786
ENSMUSG00000036792	Mbd5	7.4363
ENSMUSG00000027763	Mbnl1	3.45587
ENSMUSG00000022139	Mbnl2	3.74713
ENSMUSG00000020646	Mboat2	2.10575
ENSMUSG00000031835	Mbtps1	3.91314
ENSMUSG00000048755	Mcat	38.269
ENSMUSG00000027709	Mccc1	7.12803
ENSMUSG00000021646	Mccc2	3.18464
ENSMUSG00000024150	Mcfd2	53.7569
ENSMUSG00000002870	Mcm2	1.24544
ENSMUSG00000001150	Mcm3ap	12.1547
ENSMUSG00000022673	Mcm4	2.30462
ENSMUSG00000005410	Mcm5	5.08991
ENSMUSG00000026355	Mcm6	11.5459
ENSMUSG00000029730	Mcm7	136.781
ENSMUSG00000039842	Mcph1	8.66826
ENSMUSG00000025732	Mcrip2	2.91116
ENSMUSG00000037570	Mcrs1	72.8179
ENSMUSG00000000355	Mcts1	2.01192
ENSMUSG00000042814	Mcts2	43.2818
ENSMUSG00000009647	Mcu	3.24119
ENSMUSG00000020321	Mdh1	14.2298
ENSMUSG00000019179	Mdh2	28.2159
ENSMUSG00000032418	Me1	345.066
ENSMUSG00000024556	Me2	6.05861
ENSMUSG00000030621	Me3	19.8119
ENSMUSG00000028863	Meaf6	96.1313
ENSMUSG00000034105	Meak7	8.26918
ENSMUSG00000028910	Mecr	5.38526
ENSMUSG00000018160	Med1	41.1839
ENSMUSG00000021598	Med10	148.64
ENSMUSG00000079487	Med12	1.65235
ENSMUSG00000034297	Med13	6.03476
ENSMUSG00000018076	Med13l	2.54905
ENSMUSG00000012114	Med15	54.4831
ENSMUSG00000031935	Med17	6.04474
ENSMUSG00000027080	Med19	21.3272
ENSMUSG00000030291	Med21	17.4756
ENSMUSG00000019984	Med23	15.5081
ENSMUSG00000017210	Med24	50.6014
ENSMUSG00000002968	Med25	18.0296
ENSMUSG00000026799	Med27	22.0411
ENSMUSG00000015804	Med28	164.689
ENSMUSG00000038622	Med30	52.0963
ENSMUSG00000020801	Med31	20.1935
ENSMUSG00000022109	Med4	73.0661
ENSMUSG00000002679	Med6	45.13
ENSMUSG00000020397	Med7	91.3868
ENSMUSG00000024947	Men1	4.96885
ENSMUSG00000005813	Metap1	53.1817
ENSMUSG00000036112	Metap2	233.431
ENSMUSG00000006732	Mettl1	3.96455
ENSMUSG00000028114	Mettl14	15.358
ENSMUSG00000057234	Mettl15	4.22324
ENSMUSG00000041396	Mettl18	3.45174
ENSMUSG00000020691	Mettl2	14.3517
ENSMUSG00000090266	Mettl23	38.0123
ENSMUSG00000036009	Mettl25	6.56981
ENSMUSG00000022160	Mettl3	6.501
ENSMUSG00000055660	Mettl4	14.6399
ENSMUSG00000037253	Mex3c	12.9153
ENSMUSG00000068479	Mfap1a	30.366
ENSMUSG00000048222	Mfap1b	39.985
ENSMUSG00000027668	Mfn1	50.7076
ENSMUSG00000029020	Mfn2	104.635
ENSMUSG00000027775	Mfsd1	2.41966
ENSMUSG00000020346	Mgat1	6.83551
ENSMUSG00000043998	Mgat2	32.3021
ENSMUSG00000022517	Mgrn1	7.12157
ENSMUSG00000008540	Mgst1	21.7842
ENSMUSG00000024294	Mib1	55.9631
ENSMUSG00000029060	Mib2	13.9949
ENSMUSG00000050608	Micos10	35.9116
ENSMUSG00000020111	Micu1	9.05989
ENSMUSG00000039478	Micu3	15.2688
ENSMUSG00000035621	Midn	2.50613
ENSMUSG00000002580	Mien1	113.169
ENSMUSG00000028522	Mier1	20.1376
ENSMUSG00000020743	Mif4gd	444.443
ENSMUSG00000026767	Mindy3	23.5719
ENSMUSG00000024896	Minpp1	2.2891
ENSMUSG00000042447	Mios	45.488
ENSMUSG00000021993	Mipep	42.2283
ENSMUSG00000026088	Mitd1	4.55601
ENSMUSG00000025609	Mkln1	41.4141
ENSMUSG00000028708	Mknk1	22.0412
ENSMUSG00000020190	Mknk2	21.3808
ENSMUSG00000029922	Mkrn1	513.91
ENSMUSG00000032498	Mlh1	2.94004
ENSMUSG00000024212	Mllt1	28.5454
ENSMUSG00000026743	Mllt10	184.156
ENSMUSG00000028496	Mllt3	1.69458
ENSMUSG00000024142	Mlst8	6.21464
ENSMUSG00000017801	Mlx	5.04671
ENSMUSG00000038342	Mlxip	3.8215
ENSMUSG00000025159	Mms19	3.786
ENSMUSG00000021103	Mnat1	46.6621
ENSMUSG00000032221	Mns1	491.252
ENSMUSG00000043131	Mob1a	10.9055
ENSMUSG00000006262	Mob1b	6.60306
ENSMUSG00000025147	Mob2	13.3538
ENSMUSG00000003348	Mob3a	8.36274
ENSMUSG00000073910	Mob3b	1.05865
ENSMUSG00000025979	Mob4	10.4662
ENSMUSG00000074576	Mocs3	12.8211
ENSMUSG00000030036	Mogs	4.1772
ENSMUSG00000032583	Mon1a	7.53891
ENSMUSG00000078908	Mon1b	3.94202
ENSMUSG00000034602	Mon2	14.5906
ENSMUSG00000062270	Morf4l1	1635.8
ENSMUSG00000029477	Morn3	48.6896
ENSMUSG00000026894	Morn5	389.656
ENSMUSG00000015365	Mov10l1	36.5487
ENSMUSG00000023861	Mpc1	20.006
ENSMUSG00000026568	Mpc2	220.119
ENSMUSG00000018761	Mpdu1	15.5474
ENSMUSG00000030521	Mphosph10	93.0906
ENSMUSG00000032306	Mpi	225.61
ENSMUSG00000021112	Mpp5	24.0286
ENSMUSG00000038388	Mpp6	227.801
ENSMUSG00000057440	Mpp7	2.6298
ENSMUSG00000027569	Mrgbp	123.696
ENSMUSG00000038046	Mrm3	2.85343
ENSMUSG00000022558	Mroh1	19.1483
ENSMUSG00000029486	Mrpl1	60.0176
ENSMUSG00000024902	Mrpl11	39.9504
ENSMUSG00000039640	Mrpl12	89.1641
ENSMUSG00000022370	Mrpl13	111.122
ENSMUSG00000023939	Mrpl14	3.67538
ENSMUSG00000033845	Mrpl15	9.21002
ENSMUSG00000024683	Mrpl16	50.7629
ENSMUSG00000030879	Mrpl17	4.74137
ENSMUSG00000030045	Mrpl19	4.03829
ENSMUSG00000002767	Mrpl2	32.39
ENSMUSG00000024829	Mrpl21	14.5019
ENSMUSG00000020514	Mrpl22	48.7918
ENSMUSG00000037772	Mrpl23	2.25733
ENSMUSG00000019710	Mrpl24	318.723
ENSMUSG00000024414	Mrpl27	10.9925
ENSMUSG00000024181	Mrpl28	34.2747
ENSMUSG00000032563	Mrpl3	43.1008
ENSMUSG00000052962	Mrpl35	65.1084
ENSMUSG00000020775	Mrpl38	77.5011
ENSMUSG00000022889	Mrpl39	147.499
ENSMUSG00000003299	Mrpl4	20.8176
ENSMUSG00000022706	Mrpl40	68.9158
ENSMUSG00000025208	Mrpl43	39.242
ENSMUSG00000026248	Mrpl44	25.1879
ENSMUSG00000030612	Mrpl46	48.789
ENSMUSG00000037531	Mrpl47	43.2264
ENSMUSG00000030706	Mrpl48	103.2
ENSMUSG00000007338	Mrpl49	8.46367
ENSMUSG00000030335	Mrpl51	197.714
ENSMUSG00000034932	Mrpl54	193.321
ENSMUSG00000036860	Mrpl55	60.504
ENSMUSG00000028140	Mrpl9	32.6594
ENSMUSG00000030611	Mrps11	67.8181
ENSMUSG00000058267	Mrps14	24.7632
ENSMUSG00000034211	Mrps17	23.4735
ENSMUSG00000023967	Mrps18a	62.3734
ENSMUSG00000016833	Mrps18c	50.0931
ENSMUSG00000035772	Mrps2	6.0926
ENSMUSG00000032459	Mrps22	62.7815
ENSMUSG00000023723	Mrps23	29.9329
ENSMUSG00000014551	Mrps25	8.75956
ENSMUSG00000021731	Mrps30	39.5178
ENSMUSG00000031533	Mrps31	79.3469
ENSMUSG00000029918	Mrps33	10.862
ENSMUSG00000038880	Mrps34	8.17039
ENSMUSG00000040112	Mrps35	3.21838
ENSMUSG00000027374	Mrps5	29.9561
ENSMUSG00000046756	Mrps7	6.77998
ENSMUSG00000060679	Mrps9	52.4662
ENSMUSG00000026887	Mrrf	39.6031
ENSMUSG00000028741	Mrto4	168.758
ENSMUSG00000039693	Msantd3	3.80414
ENSMUSG00000005370	Msh6	33.5739
ENSMUSG00000066415	Msl2	10.6277
ENSMUSG00000047669	Msl3l2	46.8222
ENSMUSG00000064351	mt-Co1	2545.21
ENSMUSG00000064354	mt-Co2	3557.67
ENSMUSG00000064358	mt-Co3	939.379
ENSMUSG00000064370	mt-Cytb	773.593
ENSMUSG00000064360	mt-Nd3	204.305
ENSMUSG00000064367	mt-Nd5	377.033
ENSMUSG00000021144	Mta1	44.9206
ENSMUSG00000071646	Mta2	37.4872
ENSMUSG00000055817	Mta3	46.3798
ENSMUSG00000062937	Mtap	1.01986
ENSMUSG00000027282	Mtch2	210.303
ENSMUSG00000021519	Mterf3	139.845
ENSMUSG00000028890	Mtf1	32.4203
ENSMUSG00000039018	Mtg1	17.5465
ENSMUSG00000039069	Mtg2	8.3425
ENSMUSG00000021048	Mthfd1	2.61056
ENSMUSG00000005667	Mthfd2	23.2438
ENSMUSG00000029376	Mthfd2l	3.33029
ENSMUSG00000039458	Mtmr12	12.0605
ENSMUSG00000030269	Mtmr14	17.3363
ENSMUSG00000031918	Mtmr2	54.2042
ENSMUSG00000034354	Mtmr3	17.7133
ENSMUSG00000018401	Mtmr4	20.7117
ENSMUSG00000021987	Mtmr6	239.927
ENSMUSG00000035078	Mtmr9	45.5169
ENSMUSG00000032342	Mto1	32.6083
ENSMUSG00000028991	Mtor	43.9698
ENSMUSG00000024234	Mtpap	23.1983
ENSMUSG00000016018	Mtrex	138.085
ENSMUSG00000022022	Mtrf1	16.3414
ENSMUSG00000028158	Mttp	15.9279
ENSMUSG00000064068	Mtx1	101.989
ENSMUSG00000027099	Mtx2	46.683
ENSMUSG00000041241	Mul1	47.2101
ENSMUSG00000024906	Mus81	28.3811
ENSMUSG00000041939	Mvk	7.7715
ENSMUSG00000028647	Mycbp	137.295
ENSMUSG00000039110	Mycbpap	63.99
ENSMUSG00000032508	Myd88	21.0981
ENSMUSG00000001285	Myg1	30.8997
ENSMUSG00000020900	Myh10	61.4572
ENSMUSG00000020908	Myh3	1.16976
ENSMUSG00000053093	Myh7	1.89241
ENSMUSG00000022443	Myh9	1.58178
ENSMUSG00000024048	Myl12a	16.1822
ENSMUSG00000034868	Myl12b	22.2309
ENSMUSG00000090841	Myl6	115.362
ENSMUSG00000067818	Myl9	2.09594
ENSMUSG00000034593	Myo5a	3.14309
ENSMUSG00000025885	Myo5b	7.50429
ENSMUSG00000033577	Myo6	2.28717
ENSMUSG00000031388	Naa10	1.52082
ENSMUSG00000046000	Naa11	32.2736
ENSMUSG00000063273	Naa15	100.715
ENSMUSG00000022020	Naa16	2.09337
ENSMUSG00000002728	Naa20	26.7867
ENSMUSG00000042719	Naa25	63.9354
ENSMUSG00000036282	Naa30	29.8738
ENSMUSG00000021555	Naa35	40.7849
ENSMUSG00000059278	Naa38	110.781
ENSMUSG00000022698	Naa50	16.9181
ENSMUSG00000002881	Nab1	3.46304
ENSMUSG00000025374	Nabp2	41.367
ENSMUSG00000061315	Naca	692.147
ENSMUSG00000029063	Nadk	22.8015
ENSMUSG00000022253	Nadk2	18.5626
ENSMUSG00000031878	Nae1	112.657
ENSMUSG00000034744	Nagk	68.3864
ENSMUSG00000006024	Napa	48.4114
ENSMUSG00000027438	Napb	1.12682
ENSMUSG00000024581	Napg	8.48488
ENSMUSG00000002280	Narfl	22.1053
ENSMUSG00000024587	Nars	28.1813
ENSMUSG00000018995	Nars2	4.79702
ENSMUSG00000028693	Nasp	3460.85
ENSMUSG00000015542	Nat9	94.9484
ENSMUSG00000031505	Naxd	28.7449
ENSMUSG00000028070	Naxe	24.8863
ENSMUSG00000028224	Nbn	53.2138
ENSMUSG00000035024	Ncapd3	17.809
ENSMUSG00000015880	Ncapg	94.5549
ENSMUSG00000034906	Ncaph	37.9827
ENSMUSG00000008690	Ncaph2	26.3278
ENSMUSG00000028330	Ncbp1	333.601
ENSMUSG00000022774	Ncbp2	88.3454
ENSMUSG00000032475	Nck1	38.561
ENSMUSG00000066877	Nck2	2.34782
ENSMUSG00000027002	Nckap1	14.2499
ENSMUSG00000020238	Ncln	21.1748
ENSMUSG00000005886	Ncoa2	5.92922
ENSMUSG00000039804	Ncoa5	62.1579
ENSMUSG00000038369	Ncoa6	55.5599
ENSMUSG00000003458	Ncstn	25.4687
ENSMUSG00000024056	Ndc80	133.94
ENSMUSG00000022678	Nde1	9.5965
ENSMUSG00000018736	Ndel1	28.8322
ENSMUSG00000024425	Ndfip1	94.5224
ENSMUSG00000053253	Ndfip2	22.5611
ENSMUSG00000006471	Ndor1	6.86835
ENSMUSG00000039308	Ndst2	8.89445
ENSMUSG00000027977	Ndst3	2.15284
ENSMUSG00000027971	Ndst4	38.7455
ENSMUSG00000026260	Ndufa10	24.9633
ENSMUSG00000014294	Ndufa2	625.673
ENSMUSG00000023089	Ndufa5	116.769
ENSMUSG00000022450	Ndufa6	68.569
ENSMUSG00000041881	Ndufa7	85.8107
ENSMUSG00000026895	Ndufa8	61.8383
ENSMUSG00000000399	Ndufa9	110.332
ENSMUSG00000030869	Ndufab1	252.005
ENSMUSG00000027305	Ndufaf1	19.5377
ENSMUSG00000027384	Ndufaf5	18.5609
ENSMUSG00000050323	Ndufaf6	2.28591
[truncated: 1,680 more rows]

## Sheet: Fruit fly
id	gene	TPM
FBgn0010339	128up	39.8529
FBgn0020238	14-3-3epsilon	273.88
FBgn0004907	14-3-3zeta	39.9406
FBgn0010340	140up	4.54615
FBgn0027885	Aac11	14.1439
FBgn0027780	Aasdh	1.77211
FBgn0023129	aay	41.801
FBgn0020510	Abi	11.151
FBgn0000017	Abl	7.35035
FBgn0000018	abo	5.71966
FBgn0036372	Abp1	3.06335
FBgn0011273	Acam	914.637
FBgn0033246	ACC	13.1122
FBgn0027620	Acf	15.8871
FBgn0033749	achi	22.2507
FBgn0028484	Ack	81.8212
FBgn0263998	Ack-like	5.74447
FBgn0263198	Acn	3.19844
FBgn0010100	Acon	10.5527
FBgn0000042	Act5C	196.958
FBgn0000667	Actn	3.33154
FBgn0038363	Acyp2	138.93
FBgn0037661	Ada	16.0478
FBgn0051865	Ada1-1	1.05976
FBgn0051866	Ada1-2	1.01085
FBgn0037555	Ada2b	4.46581
FBgn0026086	Adar	1.23365
FBgn0036337	AdenoK	3.03549
FBgn0052068	Adi1	11.7754
FBgn0022709	Adk1	216.351
FBgn0283494	Adk2	11.7011
FBgn0000057	adp	50.4331
FBgn0033983	ADPS	9.99247
FBgn0038467	AdSL	2.17564
FBgn0027493	AdSS	11.3083
FBgn0038223	Afti	35.7887
FBgn0053138	AGBE	8.95434
FBgn0262739	AGO1	3.66818
FBgn0250816	AGO3	14.3524
FBgn0014455	Ahcy	17.4454
FBgn0033351	AIMP1	6.45525
FBgn0036515	AIMP2	32.1894
FBgn0050185	AIMP3	6.37207
FBgn0010379	Akt1	12.0959
FBgn0027094	AlaRS	8.06138
FBgn0020764	Alas	61.9305
FBgn0260972	alc	23.2401
FBgn0000064	Ald	552.651
FBgn0012036	Aldh	641.765
FBgn0010548	Aldh-III	21.3342
FBgn0086378	Alg-2	7.04341
FBgn0038552	Alg1	6.64275
FBgn0052076	Alg10	12.0822
FBgn0037108	Alg11	3.68269
FBgn0035401	Alg2	5.70381
FBgn0261238	Alh	8.75618
FBgn0013746	alien	13.387
FBgn0086346	ALiX	65.7083
FBgn0086361	alph	66.8104
FBgn0010215	alpha-Cat	16.2772
FBgn0259170	alpha-Man-Ia	1.81169
FBgn0039634	alpha-Man-Ib	8.02536
FBgn0011740	alpha-Man-IIa	5.9779
FBgn0030007	alpha-PheRS	4.40803
FBgn0250789	alpha-Spec	11.8234
FBgn0025725	alphaCOP	9.20056
FBgn0250791	alphaSnap	29.3804
FBgn0003884	alphaTub84B	2422.03
FBgn0003885	alphaTub84D	513.745
FBgn0003886	alphaTub85E	122.905
FBgn0037116	Als2	6.69726
FBgn0004372	aly	7.48013
FBgn0023169	AMPKalpha	28.8462
FBgn0000077	amx	1.26729
FBgn0016762	angel	11.5392
FBgn0011747	Ank	10.868
FBgn0261788	Ank2	6.95909
FBgn0028343	Ankle2	3.89097
FBgn0030749	AnxB11	11.1203
FBgn0000083	AnxB9	34.2794
FBgn0010380	AP-1-2beta	7.41554
FBgn0030089	AP-1gamma	3.66852
FBgn0024833	AP-1mu	13.9241
FBgn0039132	AP-1sigma	7.66413
FBgn0264855	AP-2alpha	4.73429
FBgn0263351	AP-2mu	20.2611
FBgn0043012	AP-2sigma	15.2787
FBgn0015589	Apc	4.50094
FBgn0034231	APC10	7.79315
FBgn0026598	Apc2	4.34041
FBgn0052707	APC4	6.2733
FBgn0031458	aph-1	18.2404
FBgn0261854	aPKC	4.5283
FBgn0261112	APP-BP1	227.11
FBgn0000109	Aprt	2.40128
FBgn0036111	Aps	36.9695
FBgn0038742	Arc42	6.04061
FBgn0013749	Arf102F	61.056
FBgn0013750	Arf51F	38.9744
FBgn0010348	Arf79F	40.5171
FBgn0020655	ArfGAP1	20.0985
FBgn0037182	ArfGAP3	44.0561
FBgn0037884	Arfip	21.7679
FBgn0030088	Arfrp1	23.8043
FBgn0027093	ArgRS	3.00453
FBgn0037526	ArgRS-m	1.19696
FBgn0017418	ari-1	2.17546
FBgn0025186	ari-2	13.7525
FBgn0000115	Arl1	17.5855
FBgn0004908	Arl2	61.527
FBgn0035866	Arl5	9.2405
FBgn0038453	Arl6IP1	114.847
FBgn0000117	arm	23.5147
FBgn0041164	armi	15.7814
FBgn0011745	Arp1	40.7947
FBgn0031050	Arp10	16.0994
FBgn0011742	Arp2	50.6354
FBgn0262716	Arp3	11.8568
FBgn0038576	Arp5	58.7391
FBgn0011743	Arp53D	210.248
FBgn0030877	Arp8	2.51474
FBgn0001961	Arpc1	74.0237
FBgn0032859	Arpc2	17.6395
FBgn0038369	Arpc3A	18.7599
FBgn0065032	Arpc3B	4.3783
FBgn0284255	Arpc4	8.69255
FBgn0031437	Arpc5	64.901
FBgn0038306	Art3	25.5175
FBgn0052442	Arv1	7.18938
FBgn0036826	arx	2.96059
FBgn0050372	Asap	9.03987
FBgn0039908	Asator	8.20479
FBgn0035407	Asciz	6.26635
FBgn0029094	asf1	2.23485
FBgn0005386	ash1	18.732
FBgn0000139	ash2	7.39142
FBgn0261004	asl	46.8292
FBgn0086443	AsnRS	10.3407
FBgn0034177	AsnRS-m	1.03685
FBgn0270926	AsnS	3.82798
FBgn0034075	Asph	3.91306
FBgn0002069	AspRS	5.22568
FBgn0051739	AspRS-m	13.7448
FBgn0026565	Ass	3.49511
FBgn0020407	asun	4.24608
FBgn0261823	Asx	18.6362
FBgn0025720	Ate1	13.8848
FBgn0260945	Atg1	3.10278
FBgn0030960	Atg101	4.75501
FBgn0036255	Atg12	18.3749
FBgn0261108	Atg13	6.71234
FBgn0039636	Atg14	18.0012
FBgn0039705	Atg16	138.956
FBgn0037363	Atg17	2.05415
FBgn0035850	Atg18a	7.60919
FBgn0032935	Atg18b	1.80015
FBgn0044452	Atg2	8.92869
FBgn0036813	Atg3	6.80883
FBgn0031298	Atg4a	2.3655
FBgn0038325	Atg4b	3.49558
FBgn0264325	Atg6	8.68214
FBgn0034366	Atg7	2.6285
FBgn0052672	Atg8a	43.6027
FBgn0038539	Atg8b	569.996
FBgn0034110	Atg9	2.08086
FBgn0039213	atl	66.145
FBgn0010750	atms	17.9671
FBgn0037671	ATP6AP2	52.1683
FBgn0037989	ATP8B	2.60313
FBgn0020236	ATPCL	11.9831
FBgn0019644	ATPsynB	292.23
FBgn0010217	ATPsynbeta	49.8579
FBgn0036568	ATPsynbetaL	26.6328
FBgn0039830	ATPsynC	66.9807
FBgn0016119	ATPsynCF6	75.4856
FBgn0016120	ATPsynD	60.6358
FBgn0028342	ATPsyndelta	10.4769
FBgn0035032	ATPsynF	230.024
FBgn0020235	ATPsyngamma	32.9718
FBgn0016691	ATPsynO	62.2345
FBgn0019637	Atu	2.12395
FBgn0041188	Atx2	42.3944
FBgn0031420	Atxn7	19.0865
FBgn0000146	aub	1.85755
FBgn0037218	aux	16.812
FBgn0000150	awd	131.417
FBgn0033238	azot	4905.77
FBgn0004587	B52	20.3882
FBgn0038342	B9d1	62.9969
FBgn0011300	babo	1.73268
FBgn0031977	baf	28.8994
FBgn0045866	bai	78.738
FBgn0027889	ball	32.5826
FBgn0030093	Bap111	64.1009
FBgn0042085	Bap170	10.4741
FBgn0025716	Bap55	4.90889
FBgn0025463	Bap60	3.08279
FBgn0037081	barc	15.392
FBgn0014127	barr	47.5695
FBgn0000163	baz	3.25254
FBgn0039071	bb8	698.707
FBgn0033844	bbc	43.735
FBgn0040239	bc10	18.2732
FBgn0039558	BCAS2	2.81418
FBgn0043362	bchs	1.45993
FBgn0013432	bcn92	21.0262
FBgn0032512	Bdp1	36.3042
FBgn0037660	beag	14.1504
FBgn0036691	beg	2.11201
FBgn0000173	ben	20.4572
FBgn0260860	Bet5	1.14296
FBgn0039175	beta-PheRS	4.52131
FBgn0250788	beta-Spec	34.9225
FBgn0025724	beta'COP	6.34944
FBgn0027538	beta4GalNAcTA	2.76095
FBgn0008635	betaCOP	9.44136
FBgn0015000	betaggt-I	3.60044
FBgn0028970	betaggt-II	12.8466
FBgn0270927	betaGlu	2.54846
FBgn0284243	betaTub56D	108.225
FBgn0003889	betaTub85D	2909.26
FBgn0003890	betaTub97EF	2.77701
FBgn0261111	BHD	6.96869
FBgn0035871	BI-1	667.122
FBgn0000181	bic	357.508
FBgn0000183	BicD	7.30791
FBgn0039509	bigmax	2.02202
FBgn0024491	Bin1	1.10818
FBgn0026262	bip2	5.93198
FBgn0010520	Bka	5.71543
FBgn0002906	Blm	27.3375
FBgn0050077	Blos1	1.61883
FBgn0036118	Blos2	1.55502
FBgn0038387	blp	48.7375
FBgn0011211	blw	67.1477
FBgn0036199	Bmcp	5.96325
FBgn0036449	bmm	10.8037
FBgn0011206	bol	693.328
FBgn0004893	bowl	2.23756
FBgn0033155	Br140	8.53445
FBgn0050169	Brca2	1.11834
FBgn0039654	Brd8	2.00293
FBgn0086694	Bre1	3.4139
FBgn0038499	Brf	2.61107
FBgn0000212	brm	1.41508
FBgn0030434	Brms1	19.174
FBgn0000114	bru1	656.192
FBgn0262475	bru2	8.87899
FBgn0261787	brun	1.50628
FBgn0011785	BRWD3	2.28782
FBgn0000229	bsk	14.7826
FBgn0023096	btv	1.24728
FBgn0045862	btz	4.11751
FBgn0031696	Bub1	31.6216
FBgn0025457	Bub3	15.1259
FBgn0263855	BubR1	3.25192
FBgn0000239	bur	72.4352
FBgn0045064	bwa	20.3696
FBgn0004856	Bx42	2.54209
FBgn0010292	bys	6.64072
FBgn0040236	c11.1	1.89397
FBgn0040235	c12.1	8.87845
FBgn0032078	C1GalTA	1.59698
FBgn0259228	C3G	4.03118
FBgn0001991	Ca-alpha1D	5.71478
FBgn0025678	CaBP1	44.1946
FBgn0000250	cact	15.4472
FBgn0022800	Cad96Ca	1.26943
FBgn0033526	Caf1-105	22.1992
FBgn0263979	Caf1-55	7.63026
FBgn0027844	CAH1	1.96674
FBgn0005585	Calr	89.1286
FBgn0262166	calypso	9.13489
FBgn0000253	Cam	96.8758
FBgn0016126	CaMKI	1.5197
FBgn0264607	CaMKII	4.74325
FBgn0259234	Camta	13.0915
FBgn0011569	can	14.6186
FBgn0040233	cana	23.406
FBgn0015614	CanB2	16.5069
FBgn0027568	Cand1	126.913
FBgn0033504	CAP	7.93076
FBgn0051989	Cap-D3	6.14335
FBgn0259876	Cap-G	54.981
FBgn0037831	Cap-H2	6.51536
FBgn0031883	Caper	3.22465
FBgn0042134	Capr	25.3553
FBgn0000257	car	7.37663
FBgn0013759	CASK	1.32144
FBgn0034068	casp	93.5061
FBgn0029093	cathD	59.1
FBgn0285954	caz	5.59401
FBgn0020224	Cbl	10.546
FBgn0022943	Cbp20	25.1075
FBgn0086757	cbs	23.4974
FBgn0031979	CCDC53	22.6339
FBgn0261353	Ccdc56	42.4134
FBgn0036909	Ccdc58	4.55273
FBgn0038331	Ccm3	42.3511
FBgn0003676	CCT1	12.6113
FBgn0030086	CCT2	22.3819
FBgn0015019	CCT3	15.1123
FBgn0032444	CCT4	24.5159
FBgn0010621	CCT5	19.6957
FBgn0027329	CCT6	12.2677
FBgn0037632	CCT7	19.5153
FBgn0284436	CCT8	32.814
FBgn0035470	Ccz1	12.7297
FBgn0031952	cdc14	271.803
FBgn0025781	Cdc16	4.09186
FBgn0032863	Cdc23	33.1476
FBgn0012058	Cdc27	86.055
FBgn0013435	Cdc2rk	3.33217
FBgn0011573	Cdc37	127.519
FBgn0010341	Cdc42	14.2632
FBgn0265574	Cdc5	44.0629
FBgn0028360	Cdc7	128.103
FBgn0004106	Cdk1	8.83875
FBgn0037093	Cdk12	27.5352
FBgn0004107	Cdk2	1.36698
FBgn0019949	Cdk9	6.11468
FBgn0026141	Cdlc2	780.823
FBgn0010350	Cds	67.4192
FBgn0036480	Cep135	22.567
FBgn0035168	cep290	32.2257
FBgn0266708	Cep89	25.8773
FBgn0031575	Cep97	260.338
FBgn0037315	Cerk	23.2362
FBgn0027569	cert	4.89431
FBgn0030121	Cfp1	3.03439
FBgn0039590	CG10011	1.66791
FBgn0037490	CG10053	77.6374
FBgn0035724	CG10064	293.199
FBgn0035722	CG10075	11.2444
FBgn0035720	CG10077	334.55
FBgn0034644	CG10082	11.8148
FBgn0036369	CG10089	298.962
FBgn0037472	CG10098	9.70883
FBgn0033933	CG10104	14.9053
FBgn0032801	CG10165	3.49395
FBgn0032799	CG10166	36.8227
FBgn0032790	CG10194	3.46116
FBgn0039115	CG10214	2.67703
FBgn0036356	CG10222	1.59997
FBgn0027512	CG10254	246.211
FBgn0037439	CG10286	1.19399
FBgn0032690	CG10333	1.65506
FBgn0022344	CG10340	19.6281
FBgn0039116	CG10375	20.4432
FBgn0031877	CG10399	1.1867
FBgn0039296	CG10420	2.4786
FBgn0036848	CG10424	4.52493
FBgn0032724	CG10428	3.99271
FBgn0037539	CG10435	15.3104
FBgn0032819	CG10463	2.09343
FBgn0032822	CG10466	16.7321
FBgn0032746	CG10470	56.4319
FBgn0037051	CG10565	150.668
FBgn0037046	CG10581	12.5943
FBgn0037044	CG10585	6.78991
FBgn0032717	CG10600	76.7233
FBgn0032721	CG10602	34.0631
FBgn0036286	CG10616	235.081
FBgn0036292	CG10646	2.05469
FBgn0035588	CG10672	2.53362
FBgn0036291	CG10681	11.5579
FBgn0039147	CG10694	74.8679
FBgn0032846	CG10721	15.571
FBgn0034081	CG10731	106.177
FBgn0034420	CG10737	4.01459
FBgn0037250	CG1074	11.3316
FBgn0036327	CG10748	41.5001
FBgn0036328	CG10749	302.678
FBgn0032769	CG10750	180.906
FBgn0030015	CG10761	153.277
FBgn0029980	CG10778	1.58521
FBgn0029656	CG10793	32.0437
FBgn0036052	CG10809	36.9007
FBgn0028858	CG10839	82.7517
FBgn0032520	CG10859	498.237
FBgn0035455	CG10862	326.162
FBgn0038773	CG10887	13.4456
FBgn0037543	CG10903	10.8565
FBgn0038090	CG10909	19.5434
FBgn0034307	CG10914	1.58756
FBgn0034308	CG10915	1.24163
FBgn0034274	CG10931	25.5847
FBgn0029969	CG10932	2.77336
FBgn0032857	CG10947	84.7216
FBgn0030004	CG10958	92.6467
FBgn0036316	CG10960	3.04815
FBgn0036306	CG10973	23.7199
FBgn0036305	CG10984	50.7867
FBgn0030524	CG10993	11.8921
FBgn0031736	CG11030	3.96627
FBgn0031836	CG11050	1.932
FBgn0033149	CG11060	82.2458
FBgn0028467	CG11070	28.3574
FBgn0039241	CG11089	3.23767
FBgn0030522	CG11103	1.65109
FBgn0034535	CG11110	101.224
FBgn0033169	CG11123	3.00787
FBgn0030518	CG11134	15.6299
FBgn0037199	CG11137	122.544
FBgn0033177	CG11141	45.3205
FBgn0037297	CG1116	25.4095
FBgn0039249	CG11168	12.3989
FBgn0034488	CG11208	5.84266
FBgn0036346	CG11251	188.377
FBgn0034442	CG11257	1.49985
FBgn0036334	CG11267	41.8911
FBgn0034713	CG11291	268.741
FBgn0039920	CG11360	2.50194
FBgn0031217	CG11377	4.89275
FBgn0037022	CG11396	19.1798
FBgn0035024	CG11414	65.0394
FBgn0024364	CG11417	1.92213
FBgn0031224	CG11454	3.13712
FBgn0035397	CG11486	9.96285
FBgn0039859	CG11539	22.2944
FBgn0039868	CG11563	4.22908
FBgn0035524	CG11583	9.46625
FBgn0030545	CG11590	20.7498
FBgn0035484	CG11594	4.96281
FBgn0023522	CG11596	1.66101
FBgn0036212	CG11597	21.0861
FBgn0037313	CG1161	15.4572
FBgn0030311	CG11699	19.2241
FBgn0029856	CG11700	17.307
FBgn0031115	CG11710	10.0336
FBgn0264712	CG1172	55.5557
FBgn0038683	CG11779	263.493
FBgn0039259	CG11781	30.5002
FBgn0030346	CG11802	16.7574
FBgn0036099	CG11811	9.99508
FBgn0031264	CG11835	5.57545
FBgn0039303	CG11857	42.3209
FBgn0039274	CG11920	2.64081
FBgn0037644	CG11964	5.40813
FBgn0027503	CG11970	4.7671
FBgn0037652	CG11980	5.96257
FBgn0037653	CG11982	257.111
FBgn0037656	CG11986	21.6308
FBgn0037312	CG11999	15.3124
FBgn0037293	CG12007	7.83807
FBgn0035444	CG12012	3.65355
FBgn0027903	CG12018	9.03249
FBgn0035421	CG12034	90.4381
FBgn0039831	CG12054	10.4479
FBgn0030099	CG12056	5.36296
FBgn0039796	CG12069	289.311
FBgn0035426	CG12078	92.9985
FBgn0043458	CG12084	32.7932
FBgn0035228	CG12091	20.379
FBgn0030457	CG12096	11.133
FBgn0035232	CG12099	48.1577
FBgn0030100	CG12106	1.96689
FBgn0030109	CG12121	21.4312
FBgn0033475	CG12129	6.199
FBgn0037356	CG12170	23.6012
FBgn0037305	CG12173	10.7548
FBgn0031636	CG12194	19.3506
FBgn0038304	CG12241	33.1989
FBgn0039557	CG12259	2.42523
FBgn0035811	CG12262	17.3718
FBgn0032620	CG12288	1.20197
FBgn0036514	CG12301	2.04617
FBgn0038590	CG12320	3.04736
FBgn0033557	CG12325	1.05105
FBgn0038617	CG12333	21.8544
FBgn0037489	CG1234	10.5832
FBgn0033550	CG12341	7.0909
FBgn0033556	CG12343	79.7767
FBgn0037370	CG1236	7.05082
FBgn0033624	CG12384	66.5293
FBgn0038202	CG12402	3.19064
FBgn0032465	CG12404	45.8701
FBgn0036809	CG12477	11.9037
FBgn0040871	CG12479	107.518
FBgn0250830	CG12547	6.20373
FBgn0036536	CG12713	12.247
FBgn0037341	CG12746	6.42417
FBgn0035321	CG1275	57.02
FBgn0030055	CG12772	3.15775
FBgn0034838	CG12782	47.985
FBgn0031041	CG12788	36.4675
FBgn0031535	CG12795	35.4302
FBgn0033948	CG12863	2.58166
FBgn0039544	CG12877	1.36283
FBgn0033523	CG12895	7.81042
FBgn0033507	CG12909	2.10226
FBgn0037061	CG12975	7.26026
FBgn0033899	CG13016	7.66167
FBgn0036652	CG13032	258.119
FBgn0035519	CG1309	104.172
FBgn0032051	CG13097	3.84417
FBgn0032156	CG13124	8.46056
FBgn0035526	CG1316	11.6801
FBgn0033623	CG13202	44.8551
FBgn0028903	CG13243	378.178
FBgn0033794	CG13326	148.61
FBgn0033856	CG13334	119.053
FBgn0025634	CG13367	4.42719
FBgn0025640	CG13369	6.70476
FBgn0032031	CG13390	3.20545
FBgn0034513	CG13423	11.7417
FBgn0034532	CG13436	194.113
FBgn0034692	CG13502	1.79025
FBgn0034786	CG13531	1.81884
FBgn0030151	CG1354	18.2941
FBgn0039170	CG13609	3.98808
FBgn0039205	CG13623	58.9242
FBgn0039219	CG13630	24.3375
FBgn0035890	CG13667	101.613
FBgn0031235	CG13693	134.454
FBgn0033482	CG1371	11.8928
FBgn0031897	CG13784	17.5899
FBgn0038960	CG13855	84.8224
FBgn0035109	CG13876	16.7106
FBgn0035165	CG13887	30.161
FBgn0035164	CG13901	72.1437
FBgn0035248	CG13919	4.60193
FBgn0035243	CG13926	8.80275
FBgn0031785	CG13991	129.08
FBgn0031772	CG13994	162.161
FBgn0031753	CG13999	23.0176
FBgn0031707	CG14020	7.07998
FBgn0031659	CG14043	96.7761
FBgn0036696	CG14057	1.3364
FBgn0029964	CG1409	104.416
FBgn0036889	CG14100	1.33306
FBgn0036210	CG14130	7.60689
FBgn0033468	CG1418	478.135
FBgn0031040	CG14210	1.11238
FBgn0031036	CG14220	3.03493
FBgn0037347	CG1427	20.7103
FBgn0031351	CG14352	3.30699
FBgn0030584	CG14407	65.8741
FBgn0030582	CG14411	27.2581
FBgn0029911	CG14435	6.10346
FBgn0033000	CG14464	6.30594
FBgn0034242	CG14480	294.958
FBgn0034248	CG14483	73.7343
FBgn0031188	CG14613	52.4015
FBgn0031189	CG14618	1.94077
FBgn0031183	CG14621	26.8162
FBgn0037220	CG14641	39.1523
FBgn0250821	CG14644	180.77
FBgn0037244	CG14647	9.09666
FBgn0037252	CG14650	20.0364
FBgn0037822	CG14683	9.48591
FBgn0037883	CG14701	1.24595
FBgn0037930	CG14715	7.97964
FBgn0037943	CG14722	11.7846
FBgn0037986	CG14736	100.368
FBgn0037988	CG14740	600.628
FBgn0033274	CG14757	328.673
FBgn0040777	CG14767	25.9814
FBgn0035799	CG14838	33.946
FBgn0031174	CG1486	10.1522
FBgn0038432	CG14883	1.92373
FBgn0015351	CG14906	1.4995
FBgn0032345	CG14921	85.3423
FBgn0035414	CG14965	2.03086
FBgn0035415	CG14966	9.16426
FBgn0035449	CG14971	10.6421
FBgn0035497	CG14995	1749.34
FBgn0035518	CG15011	4.66769
FBgn0035528	CG15012	45.1478
FBgn0031157	CG1503	94.7972
FBgn0034402	CG15084	2.3737
FBgn0034390	CG15093	4.16192
FBgn0034400	CG15099	14.513
FBgn0034417	CG15117	5.34914
FBgn0032635	CG15141	29.8656
FBgn0032647	CG15143	27.3135
FBgn0032648	CG15144	64.6207
FBgn0032649	CG15145	39.0507
FBgn0032688	CG15160	1.9043
FBgn0039601	CG1523	8.16998
FBgn0030183	CG15309	8.95242
FBgn0031143	CG1532	20.7561
FBgn0029986	CG15332	1.98537
FBgn0029989	CG15333	55.3365
FBgn0039828	CG1542	40.1641
FBgn0031607	CG15440	16.7519
FBgn0031132	CG15450	58.993
FBgn0040650	CG15456	7.13952
FBgn0039744	CG15526	41.2909
FBgn0039829	CG15561	5.15847
FBgn0029993	CG1571	101.21
FBgn0030465	CG15743	2.88129
FBgn0029801	CG15771	4.20949
FBgn0035308	CG15822	4.55678
FBgn0031292	CG15824	64.516
FBgn0040528	CG15864	3.88283
FBgn0033191	CG1598	58.07
FBgn0033183	CG1620	20.4922
FBgn0030478	CG1640	156.446
FBgn0039600	CG1646	10.3497
FBgn0030286	CG1657	2.02881
FBgn0033454	CG1671	1.40827
FBgn0032522	CG16848	74.4916
FBgn0034483	CG16894	461.415
FBgn0033883	CG16935	70.2194
FBgn0036512	CG16979	234.934
FBgn0062517	CG16984	371.264
FBgn0035355	CG16985	4.51791
FBgn0035356	CG16986	21.0607
FBgn0032424	CG17010	370.277
FBgn0039972	CG17018	1.51925
FBgn0033783	CG17019	3.16902
FBgn0035584	CG17030	181.684
FBgn0032449	CG17036	17.6129
FBgn0031099	CG17065	9.70456
FBgn0031239	CG17075	1.97037
FBgn0039070	CG17083	346.641
FBgn0039020	CG17141	25.644
FBgn0037882	CG17187	1.04368
FBgn0039366	CG17198	138.462
FBgn0038043	CG17202	85.5708
FBgn0030687	CG17209	1.42889
FBgn0031494	CG17219	4.7762
FBgn0031164	CG1724	97.5572
FBgn0031488	CG17265	1.60212
FBgn0033089	CG17266	23.291
FBgn0038829	CG17271	12.5084
FBgn0030239	CG17333	49.7636
FBgn0259979	CG17337	18.2095
FBgn0037276	CG17387	110.346
FBgn0039959	CG17514	7.0242
FBgn0038462	CG17556	24.6101
FBgn0032768	CG17564	420.453
FBgn0038424	CG17565	31.2503
FBgn0031544	CG17593	57.8228
FBgn0032715	CG17597	1.19749
FBgn0025837	CG17636	13.1421
FBgn0034352	CG17669	76.2739
FBgn0262115	CG17683	2.33003
FBgn0039993	CG17691	8.60589
FBgn0027597	CG17712	13.1037
FBgn0037880	CG17726	4.88434
FBgn0030114	CG17754	35.3534
FBgn0034748	CG17807	1.20585
FBgn0030061	CG1785	2.10641
FBgn0040005	CG17883	14.6846
FBgn0030063	CG1789	4.49046
FBgn0023537	CG17896	7.62578
FBgn0032597	CG17904	5.76786
FBgn0033199	CG17985	2.35397
FBgn0032791	CG18094	1.22751
FBgn0030359	CG18130	166.772
FBgn0029945	CG18155	113.111
FBgn0034403	CG18190	14.0966
FBgn0030956	CG18259	41.5235
FBgn0033836	CG18278	1.21548
FBgn0033905	CG18324	1.21647
FBgn0030345	CG1847	3.21986
FBgn0039463	CG18472	111.237
FBgn0040696	CG18675	140.681
FBgn0042182	CG18749	2.85817
FBgn0042127	CG18789	56.3268
FBgn0042138	CG18815	38.725
FBgn0033226	CG1882	161.768
FBgn0030377	CG1924	8.49176
FBgn0033214	CG1941	2.77173
FBgn0039623	CG1951	7.07119
FBgn0033401	CG1968	3.84648
FBgn0037391	CG2017	68.5801
FBgn0035271	CG2021	8.53259
FBgn0037383	CG2023	35.9626
FBgn0039887	CG2053	91.5209
FBgn0037369	CG2100	96.9259
FBgn0030243	CG2186	1.16299
FBgn0032955	CG2201	28.5656
FBgn0039767	CG2218	24.9686
FBgn0039773	CG2224	113.281
FBgn0039790	CG2246	3.53132
FBgn0030000	CG2260	1.67296
FBgn0030460	CG2453	16.6707
FBgn0032864	CG2493	5.05575
FBgn0030411	CG2540	1.46361
FBgn0030386	CG2574	244.337
FBgn0037298	CG2604	20.7306
FBgn0032870	CG2608	3.20543
FBgn0032873	CG2614	4.5653
FBgn0037478	CG2656	11.3998
FBgn0024992	CG2658	49.8618
FBgn0024998	CG2685	2.48963
FBgn0030504	CG2691	5.88273
FBgn0024973	CG2701	13.3478
FBgn0031566	CG2818	4.39811
FBgn0014930	CG2846	3.53306
FBgn0034753	CG2852	156.771
FBgn0030207	CG2887	34.8164
FBgn0023529	CG2918	13.3253
FBgn0023528	CG2924	3.8149
FBgn0031462	CG2964	300.856
FBgn0034936	CG2970	125.758
FBgn0030177	CG2972	9.25419
FBgn0030178	CG2974	6.24611
FBgn0031468	CG2975	1.02069
FBgn0050054	CG30054	6.49557
FBgn0260475	CG30059	1.53073
FBgn0050108	CG30108	17.9654
FBgn0050109	CG30109	172.616
FBgn0050122	CG30122	30.7912
FBgn0040337	CG3021	28.6433
FBgn0050268	CG30268	32.6188
FBgn0050275	CG30275	72.1105
FBgn0050291	CG30291	4.66259
FBgn0050349	CG30349	6.55044
FBgn0050382	CG30382	254.089
FBgn0050384	CG30384	103.278
FBgn0050389	CG30389	17.5607
FBgn0050392	CG30392	45.7132
FBgn0050394	CG30394	4.00411
FBgn0050398	CG30398	104.911
FBgn0050423	CG30423	47.8212
FBgn0050429	CG30429	171.34
FBgn0050493	CG30493	5.59664
FBgn0050499	CG30499	239.622
FBgn0023527	CG3071	1.08083
FBgn0034816	CG3085	916.058
FBgn0051013	CG31013	46.3163
FBgn0051021	CG31021	12.196
FBgn0033005	CG3107	44.5912
FBgn0051075	CG31075	59.1913
FBgn0051115	CG31115	232.131
FBgn0051126	CG31126	41.1651
FBgn0034957	CG3121	145.899
FBgn0051211	CG31211	10.555
FBgn0051223	CG31223	1.49614
FBgn0051229	CG31229	55.8654
FBgn0051249	CG31249	10.4214
FBgn0051357	CG31357	3.57123
FBgn0051358	CG31358	52.854
FBgn0051368	CG31368	1.88229
FBgn0051413	CG31413	2.359
FBgn0051460	CG31460	7.44666
FBgn0051475	CG31475	2.63445
FBgn0027564	CG3149	16.5141
FBgn0051550	CG31550	10.4575
FBgn0023536	CG3156	27.7051
FBgn0051648	CG31648	7.40893
FBgn0051678	CG31678	29.89
FBgn0051687	CG31687	2.91087
FBgn0051694	CG31694	117.405
FBgn0051702	CG31702	28.8443
FBgn0051703	CG31703	39.4157
FBgn0051717	CG31717	28.568
FBgn0051729	CG31729	31.7881
FBgn0051730	CG31730	138.399
FBgn0051787	CG31787	253.094
FBgn0051800	CG31800	45.9523
FBgn0051802	CG31802	511.263
FBgn0051803	CG31803	197.504
FBgn0051855	CG31855	31.5833
FBgn0051915	CG31915	1.82431
FBgn0051924	CG31924	159.831
FBgn0051935	CG31935	11.8586
FBgn0031360	CG31937	5.87172
FBgn0051957	CG31957	30.4559
FBgn0051960	CG31960	51.5007
FBgn0029887	CG3198	1.3888
FBgn0052006	CG32006	4.86236
FBgn0052022	CG32022	121.617
FBgn0052066	CG32066	21.7499
FBgn0052075	CG32075	2.11091
FBgn0052087	CG32087	87.1346
FBgn0034971	CG3209	73.467
FBgn0052099	CG32099	4.03508
FBgn0052104	CG32104	1.26435
FBgn0052137	CG32137	55.8914
FBgn0052176	CG32176	5.31819
FBgn0052196	CG32196	3.09507
FBgn0052199	CG32199	1.26501
FBgn0036014	CG3222	479.359
FBgn0037538	CG3223	56.1099
FBgn0052264	CG32264	59.0597
FBgn0047135	CG32276	83.2759
FBgn0052281	CG32281	3.88656
FBgn0063667	CG32335	2.04142
FBgn0052371	CG32371	1089.4
FBgn0052373	CG32373	4.97726
FBgn0052392	CG32392	268.388
FBgn0052396	CG32396	214.667
FBgn0260481	CG32454	131.669
FBgn0052487	CG32487	75.4074
FBgn0052488	CG32488	132.398
FBgn0052549	CG32549	51.8895
FBgn0052568	CG32568	45.7107
FBgn0032986	CG3262	60.3868
FBgn0052706	CG32706	11.3634
FBgn0052708	CG32708	10.1748
FBgn0052758	CG32758	2.53189
FBgn0040384	CG32795	24.8215
FBgn0052832	CG32832	509.384
FBgn0034573	CG3295	12.5986
FBgn0036016	CG3306	222.09
FBgn0029756	CG3309	2.86653
FBgn0028916	CG33090	5.52618
FBgn0053096	CG33096	48.9533
FBgn0053111	CG33111	6.55531
FBgn0053116	CG33116	2.04818
FBgn0053129	CG33129	122.043
FBgn0053140	CG33140	90.2243
FBgn0053156	CG33156	4.0777
FBgn0053158	CG33158	24.8378
FBgn0053217	CG33217	3.27915
FBgn0032120	CG33298	3.25699
FBgn0053303	CG33303	49.9999
FBgn0036018	CG3335	3.21443
FBgn0034989	CG3356	31.1595
FBgn0061359	CG33671	20.3168
FBgn0053673	CG33673	7.96396
FBgn0064116	CG33713	17.6804
FBgn0064126	CG33722	43.4884
FBgn0061362	CG33785	3.58425
FBgn0035240	CG33791	707.534
FBgn0066303	CG33932	7.4417
FBgn0053964	CG33964	11.6989
FBgn0053969	CG33969	8.8746
FBgn0053977	CG33977	19.0225
FBgn0054015	CG34015	17.4509
FBgn0054039	CG34039	22.0556
FBgn0036008	CG3408	100.755
FBgn0083962	CG34126	2.17443
FBgn0083968	CG34132	4.3946
FBgn0083976	CG34140	2.03738
FBgn0085190	CG34161	256.198
FBgn0085212	CG34183	2.05223
FBgn0085260	CG34231	6.46905
FBgn0031229	CG3436	3.61242
FBgn0035998	CG3437	3.30393
FBgn0085413	CG34384	5.13831
FBgn0085430	CG34401	5.70351
FBgn0085478	CG34449	3.64342
FBgn0035005	CG3483	356.247
FBgn0028887	CG3491	9.30178
FBgn0035027	CG3511	1.51996
FBgn0031431	CG3515	17.4307
FBgn0029714	CG3527	2.47744
FBgn0028497	CG3530	17.7294
FBgn0031492	CG3542	3.92684
FBgn0025681	CG3558	21.7699
FBgn0035065	CG3589	3.66066
FBgn0030735	CG3632	2.00098
FBgn0031238	CG3645	4.35577
FBgn0031600	CG3652	15.6625
FBgn0038461	CG3678	26.2014
FBgn0035987	CG3689	5.90443
FBgn0031590	CG3702	273.472
FBgn0040346	CG3704	1.20731
FBgn0031657	CG3756	47.1266
FBgn0036684	CG3764	2.78661
FBgn0038692	CG3773	1.14822
FBgn0035088	CG3776	20.4651
FBgn0029853	CG3781	45.3086
FBgn0031662	CG3792	10.8544
FBgn0028507	CG3793	2.61183
FBgn0034938	CG3803	3.35809
FBgn0037995	CG3809	390.367
FBgn0029861	CG3815	9.63134
FBgn0023520	CG3857	1.49283
FBgn0034951	CG3860	25.1562
FBgn0027524	CG3909	19.5598
FBgn0058045	CG40045	25.1492
FBgn0058178	CG40178	9.90509
FBgn0058191	CG40191	11.3829
FBgn0011824	CG4038	2.23963
FBgn0037018	CG4042	14.6446
FBgn0025629	CG4045	1.24664
FBgn0085736	CG40472	51.8432
FBgn0036301	CG4069	8.63725
FBgn0037017	CG4074	1.69399
FBgn0035983	CG4080	23.6062
FBgn0036648	CG4098	6.47897
FBgn0028474	CG4119	2.52717
FBgn0085693	CG41562	2.94203
FBgn0036793	CG4174	3.30126
FBgn0250755	CG42233	3.22577
FBgn0259166	CG42271	14.5038
FBgn0259221	CG42321	63.91
FBgn0031384	CG4238	24.35
FBgn0259729	CG42383	341.383
FBgn0259735	CG42389	4.64321
FBgn0259935	CG42458	1.41364
FBgn0260659	CG42542	1.85864
FBgn0260758	CG42556	389.137
FBgn0260965	CG42588	4.81759
FBgn0034598	CG4266	8.1208
FBgn0261570	CG42684	5.5992
FBgn0014092	CG4278	3.78444
FBgn0261996	CG42814	63.6215
FBgn0024983	CG4293	6.07456
FBgn0036787	CG4306	59.0403
FBgn0030456	CG4332	3.92948
FBgn0263050	CG43345	37.3608
FBgn0032138	CG4364	9.33348
FBgn0263706	CG43658	8.84025
FBgn0264305	CG43783	153.818
FBgn0038771	CG4390	294.862
FBgn0030431	CG4407	5.55219
FBgn0031296	CG4415	17.6078
FBgn0265178	CG44243	109.209
FBgn0037843	CG4511	184.942
FBgn0032153	CG4537	2.77312
FBgn0038745	CG4538	447.114
FBgn0031304	CG4552	97.6808
FBgn0029912	CG4557	14.0329
FBgn0029929	CG4593	6.91628
FBgn0034735	CG4610	5.92202
FBgn0035021	CG4622	12.5615
FBgn0033808	CG4627	13.9226
FBgn0283434	CG46277	56.9903
FBgn0030435	CG4645	9.31299
FBgn0033810	CG4646	6.86921
FBgn0038735	CG4662	42.05
FBgn0033815	CG4676	19.189
FBgn0033816	CG4679	4.21224
FBgn0069913	CG4681	389.355
FBgn0039029	CG4704	53.6827
FBgn0037862	CG4706	256.7
FBgn0032169	CG4709	1.28302
FBgn0036623	CG4729	21.7694
FBgn0039357	CG4743	10.0051
FBgn0034733	CG4752	4.33412
FBgn0036622	CG4753	1.15599
FBgn0030790	CG4768	2.03476
FBgn0030792	CG4789	13.9136
FBgn0039013	CG4813	2.93968
FBgn0037010	CG4825	47.2966
FBgn0030796	CG4829	2.22713
FBgn0039566	CG4849	1.51161
FBgn0037011	CG4858	5.75114
FBgn0037999	CG4860	3.49622
FBgn0034232	CG4866	6.29678
FBgn0039565	CG4884	1.85671
FBgn0031318	CG4887	2.2646
FBgn0031319	CG4896	18.6116
FBgn0035959	CG4911	15.0697
FBgn0032204	CG4953	1.78051
FBgn0032205	CG4957	14.1269
FBgn0032214	CG4968	262.399
FBgn0032217	CG4972	33.5314
FBgn0031322	CG5001	3.32701
FBgn0027572	CG5009	7.41511
FBgn0038396	CG5013	6.93809
FBgn0035944	CG5021	18.2762
FBgn0039373	CG5024	569.427
FBgn0035945	CG5026	5.43539
FBgn0036579	CG5027	7.92404
FBgn0039358	CG5028	12.5933
FBgn0028744	CG5033	2.92159
FBgn0032222	CG5037	28.5697
FBgn0038326	CG5044	2.71421
FBgn0032229	CG5045	553.698
FBgn0032231	CG5056	71.1133
FBgn0037007	CG5059	8.19057
FBgn0029747	CG5062	102.691
FBgn0035951	CG5068	5.03388
FBgn0035953	CG5087	5.29941
FBgn0036784	CG5103	265.007
FBgn0032642	CG5110	2.0452
FBgn0032471	CG5122	219.427
FBgn0036775	CG5147	8.08338
FBgn0031904	CG5149	2.30116
FBgn0038038	CG5167	5.34653
FBgn0031909	CG5181	21.0402
FBgn0034350	CG5189	2.81824
FBgn0037891	CG5214	292.885
FBgn0038486	CG5265	265.904
FBgn0037897	CG5270	8.12061
FBgn0036987	CG5274	5.21709
FBgn0037900	CG5276	252.111
FBgn0037902	CG5281	10.2986
FBgn0032477	CG5287	2.3983
FBgn0036772	CG5290	1.81683
FBgn0030577	CG5334	8.60411
FBgn0030578	CG5347	63.5102
FBgn0038951	CG5380	6.88832
FBgn0038950	CG5382	5.24803
FBgn0039425	CG5432	370.563
FBgn0031331	CG5440	17.7717
FBgn0032429	CG5446	54.1161
FBgn0039427	CG5447	5.16697
FBgn0032478	CG5458	152.012
FBgn0039450	CG5484	71.424
FBgn0039163	CG5515	27.5263
FBgn0034158	CG5522	1.4463
FBgn0034908	CG5543	3.0188
FBgn0034914	CG5554	224.593
FBgn0038686	CG5555	157.927
FBgn0031332	CG5556	223.373
FBgn0031333	CG5561	285.516
FBgn0036760	CG5567	45.6735
FBgn0039537	CG5590	12.6381
FBgn0038058	CG5608	1.27763
FBgn0036975	CG5618	1.60864
FBgn0038046	CG5641	42.8284
FBgn0030620	CG5662	28.6076
FBgn0032200	CG5676	29.9397
FBgn0034315	CG5721	53.6568
FBgn0039182	CG5728	1.39848
FBgn0034299	CG5757	6.16366
FBgn0032450	CG5776	3.17003
FBgn0032446	CG5780	6.15444
FBgn0032677	CG5790	467.037
FBgn0038858	CG5793	66.2971
FBgn0030855	CG5800	2.5313
FBgn0027617	CG5808	9.60526
FBgn0038515	CG5823	224.277
FBgn0032171	CG5846	17.1489
FBgn0032172	CG5850	45.5139
FBgn0015338	CG5861	24.3148
FBgn0038868	CG5862	64.2467
FBgn0025700	CG5885	203.061
FBgn0039136	CG5902	9.29707
FBgn0039385	CG5913	8.90797
FBgn0038876	CG5919	14.0966
FBgn0039505	CG5934	21.9922
FBgn0046247	CG5938	60.9254
FBgn0036211	CG5946	7.34812
FBgn0038672	CG6005	21.1427
FBgn0038927	CG6015	18.6238
FBgn0039421	CG6036	201.437
FBgn0039488	CG6066	2.00216
FBgn0039417	CG6073	9.06895
FBgn0036183	CG6083	90.472
FBgn0086254	CG6084	228.419
FBgn0040985	CG6115	40.287
FBgn0038332	CG6136	25.6473
FBgn0032259	CG6144	10.7231
FBgn0033853	CG6145	3.68084
FBgn0032445	CG6153	102.12
FBgn0026737	CG6171	29.5719
FBgn0039158	CG6182	1.48402
FBgn0038723	CG6195	12.2554
FBgn0038321	CG6218	255.417
FBgn0033865	CG6220	12.9875
FBgn0027582	CG6230	279.039
FBgn0032350	CG6287	20.3733
FBgn0037814	CG6325	10.6952
FBgn0037816	CG6345	1.17187
FBgn0032632	CG6380	475.383
FBgn0027615	CG6404	247.711
FBgn0034269	CG6406	7.65569
FBgn0036104	CG6418	4.11472
FBgn0039187	CG6454	1.64459
FBgn0036710	CG6479	66.2777
FBgn0034247	CG6484	1.25569
FBgn0032361	CG6488	1.54519
FBgn0036702	CG6512	231.624
FBgn0032509	CG6523	34.8851
FBgn0032513	CG6565	130.227
FBgn0037842	CG6567	14.4763
FBgn0039204	CG6607	6.59704
FBgn0035675	CG6610	8.26229
FBgn0030944	CG6617	5.37975
FBgn0037855	CG6621	1.6082
FBgn0035911	CG6638	1.37067
FBgn0036402	CG6650	51.8953
FBgn0036687	CG6652	459.918
FBgn0034172	CG6665	8.195
FBgn0032388	CG6686	19.3647
FBgn0039215	CG6695	5.55119
FBgn0032305	CG6700	3.59021
FBgn0036058	CG6707	16.452
FBgn0032408	CG6712	6.93295
FBgn0032298	CG6724	3.97069
FBgn0032296	CG6729	4.29096
FBgn0038296	CG6752	198.951
FBgn0034704	CG6758	30.9876
FBgn0036031	CG6761	209.729
FBgn0032398	CG6766	29.9784
FBgn0036030	CG6767	14.8951
FBgn0030878	CG6769	5.7921
FBgn0034179	CG6805	2.05131
FBgn0036405	CG6833	17.7476
FBgn0036828	CG6841	3.64561
FBgn0036827	CG6843	4.44227
FBgn0036488	CG6878	144.078
FBgn0029737	CG6903	82.4638
FBgn0031711	CG6907	144.893
FBgn0037944	CG6923	52.8325
FBgn0036236	CG6931	80.4472
FBgn0038989	CG6937	2.24358
FBgn0037955	CG6950	11.9173
FBgn0030959	CG6961	63.5746
FBgn0037958	CG6962	5.19741
FBgn0038286	CG6966	8.13934
FBgn0037962	CG6971	244.513
FBgn0030085	CG6999	9.61344
FBgn0039233	CG7006	6.70685
FBgn0036489	CG7011	3.94049
FBgn0029722	CG7024	269.082
FBgn0027587	CG7028	10.6314
FBgn0039026	CG7029	2.77304
FBgn0038957	CG7059	262.685
FBgn0038952	CG7069	319.19
FBgn0032517	CG7099	3.96286
FBgn0037147	CG7140	282.375
FBgn0031947	CG7154	3.95943
FBgn0038588	CG7156	12.8867
FBgn0038586	CG7168	6.86137
FBgn0035872	CG7185	17.5585
FBgn0038569	CG7218	110.861
FBgn0030081	CG7246	1.8771
FBgn0036214	CG7264	240.859
FBgn0038272	CG7265	7.7469
FBgn0036500	CG7275	7.85912
FBgn0031713	CG7277	45.0217
FBgn0031379	CG7289	61.755
FBgn0030968	CG7322	1.02729
FBgn0030973	CG7332	19.2864
FBgn0036188	CG7339	5.45785
FBgn0037581	CG7352	36.0502
FBgn0038258	CG7362	159.407
FBgn0035689	CG7376	4.42775
FBgn0038546	CG7379	17.3437
FBgn0036173	CG7394	47.0233
FBgn0037135	CG7414	720.305
FBgn0036762	CG7430	262.667
FBgn0032258	CG7456	3.47326
FBgn0034432	CG7461	4.81935
FBgn0037573	CG7483	8.53028
FBgn0036745	CG7484	12.3541
FBgn0038106	CG7488	5.4864
FBgn0038256	CG7530	7.75749
FBgn0035793	CG7546	20.556
FBgn0035839	CG7550	7.09569
FBgn0036734	CG7564	5.43493
FBgn0027583	CG7601	21.7322
FBgn0037094	CG7611	4.47508
FBgn0036142	CG7616	127.028
FBgn0033548	CG7637	8.15028
FBgn0036133	CG7638	19.9466
FBgn0033989	CG7639	53.7879
FBgn0036516	CG7656	174.835
FBgn0038627	CG7694	196.839
FBgn0035800	CG7716	197.466
FBgn0038649	CG7718	39.9177
FBgn0036686	CG7728	2.61166
FBgn0036509	CG7739	8.80333
FBgn0031690	CG7742	289.618
FBgn0034447	CG7744	3.53693
FBgn0034105	CG7755	343.034
FBgn0030087	CG7766	6.36342
FBgn0039698	CG7789	2.2175
FBgn0033038	CG7791	2.98411
FBgn0038565	CG7794	371.303
FBgn0036496	CG7804	32.6173
FBgn0032017	CG7810	8.11937
FBgn0039697	CG7834	5.37992
FBgn0036124	CG7839	1.39014
FBgn0036502	CG7841	181.682
FBgn0034127	CG7848	165.078
FBgn0033060	CG7849	6.01713
FBgn0031003	CG7889	3.32926
FBgn0038887	CG7907	22.9583
FBgn0027549	CG7927	196.673
FBgn0039743	CG7946	55.4352
FBgn0035253	CG7971	5.03397
FBgn0035254	CG7974	24.3092
FBgn0036096	CG8003	28.1994
FBgn0036920	CG8004	23.83
FBgn0036090	CG8009	10.0534
FBgn0037607	CG8036	351.8
FBgn0035831	CG8038	5.74454
FBgn0038597	CG8064	1.23969
FBgn0033891	CG8067	12.758
FBgn0033373	CG8080	18.1444
FBgn0030660	CG8097	73.1837
FBgn0037687	CG8132	1.43949
FBgn0037689	CG8135	37.3458
FBgn0030871	CG8142	4.36113
FBgn0037700	CG8149	7.7426
FBgn0034008	CG8152	13.3883
FBgn0037702	CG8176	60.3921
FBgn0030674	CG8184	9.86369
FBgn0030863	CG8188	70.6952
FBgn0034032	CG8195	1.78911
FBgn0033369	CG8197	139.354
FBgn0037709	CG8199	3.15841
FBgn0034033	CG8204	108.147
FBgn0035830	CG8209	56.2739
FBgn0035693	CG8219	61.5392
FBgn0037624	CG8223	2.66284
FBgn0033349	CG8243	20.5438
FBgn0033031	CG8245	163.948
FBgn0033337	CG8272	25.2582
FBgn0037716	CG8273	19.6718
FBgn0034141	CG8311	5.43552
FBgn0033903	CG8323	12.0196
FBgn0036020	CG8336	74.8443
FBgn0032000	CG8372	24.0836
FBgn0037638	CG8379	34.1506
FBgn0034066	CG8397	154.741
FBgn0034073	CG8414	3.72568
FBgn0037744	CG8417	110.701
FBgn0031996	CG8460	8.00967
FBgn0031995	CG8475	8.68683
FBgn0033915	CG8485	12.7186
FBgn0031992	CG8498	24.4733
FBgn0034472	CG8517	1716.84
FBgn0033734	CG8520	101.41
FBgn0033735	CG8525	259.549
FBgn0033918	CG8531	340.148
FBgn0035714	CG8549	113.272
FBgn0030699	CG8578	2.98441
FBgn0033322	CG8584	226.737
FBgn0035763	CG8602	11.8983
FBgn0033924	CG8613	11.6933
FBgn0033317	CG8635	70.1834
FBgn0032938	CG8671	4.71637
FBgn0030834	CG8675	1.3637
FBgn0026577	CG8677	5.59693
FBgn0033235	CG8728	357.01
FBgn0033769	CG8768	3.02939
FBgn0033376	CG8777	2.02186
FBgn0033761	CG8778	5.35041
FBgn0036897	CG8786	31.8717
FBgn0033408	CG8800	20.4038
FBgn0036386	CG8833	2.6936
FBgn0033691	CG8860	53.2457
FBgn0027504	CG8878	25.1805
FBgn0031663	CG8891	1.77209
FBgn0031664	CG8892	37.2269
FBgn0030717	CG8931	9.11389
FBgn0030720	CG8939	3.4169
FBgn0034181	CG8963	39.8137
FBgn0035334	CG8993	19.5188
FBgn0033639	CG9003	17.9323
FBgn0035336	CG9004	3.13039
FBgn0034173	CG9010	420.807
FBgn0035318	CG9018	21.7924
FBgn0033607	CG9062	19.334
FBgn0030791	CG9132	3.21674
FBgn0035203	CG9149	9.17635
FBgn0029514	CG9166	15.7708
FBgn0031779	CG9175	18.5154
FBgn0031784	CG9222	367.853
FBgn0030669	CG9240	75.4201
FBgn0032925	CG9246	1.09403
FBgn0032923	CG9248	22.2322
FBgn0032907	CG9272	17.8846
FBgn0036882	CG9279	74.8027
FBgn0030672	CG9281	137.114
FBgn0038183	CG9286	6.22187
FBgn0034681	CG9308	117.932
FBgn0034566	CG9313	298.61
FBgn0034564	CG9344	20.9849
FBgn0037688	CG9356	20.8841
FBgn0037064	CG9389	933.286
FBgn0037063	CG9391	85.5361
FBgn0037710	CG9393	189.756
FBgn0037715	CG9399	4.03429
FBgn0034592	CG9406	194.612
FBgn0032485	CG9426	15.7511
FBgn0034618	CG9485	1.99966
FBgn0037726	CG9492	1.81335
FBgn0031818	CG9536	18.8884
FBgn0031824	CG9547	1.15768
FBgn0031092	CG9577	4.7746
FBgn0031094	CG9578	21.8092
FBgn0031093	CG9581	132.262
FBgn0032101	CG9586	41.8872
FBgn0038361	CG9589	268.805
FBgn0037578	CG9601	8.00392
FBgn0030787	CG9609	3.53202
FBgn0036857	CG9629	8.83382
FBgn0031529	CG9662	56.4276
FBgn0038209	CG9722	129.56
FBgn0037445	CG9727	8.94703
FBgn0037229	CG9766	19.0757
FBgn0037609	CG9773	7.18144
FBgn0038146	CG9799	6.89668
FBgn0086605	CG9853	70.0201
FBgn0037242	CG9855	253.442
FBgn0034814	CG9890	2.72883
FBgn0034829	CG9899	9.9684
FBgn0030734	CG9911	18.715
FBgn0030738	CG9915	3.41527
FBgn0038200	CG9920	3102.15
FBgn0032467	CG9934	101.928
FBgn0030514	CG9941	7.35639
FBgn0034527	CG9945	11.5444
FBgn0030752	CG9947	5.11249
FBgn0031451	CG9961	188.52
FBgn0021760	chb	286.622
FBgn0000319	Chc	27.7564
FBgn0250786	Chd1	14.0338
FBgn0023395	Chd3	6.71177
FBgn0013764	Chi	15.5323
FBgn0000307	chif	1.46101
FBgn0028387	chm	37.5671
FBgn0035589	CHMP2B	25.3377
FBgn0029709	CHOp24	12.3031
FBgn0029503	CHORD	22.2979
FBgn0039689	CIA30	25.242
FBgn0033972	Ciao1	20.2839
FBgn0001977	CIAPIN1	23.7224
FBgn0035533	Cip4	3.37516
FBgn0044323	Cka	82.3722
FBgn0264492	CkIIalpha	54.2162
FBgn0000259	CkIIbeta	48.4007
FBgn0026136	CkIIbeta2	166.464
FBgn0010314	Cks30A	12.1551
FBgn0037613	Cks85A	16.7917
FBgn0259152	Clbn	5.0151
FBgn0024814	Clc	53.2968
FBgn0020503	CLIP-190	133.461
FBgn0023076	Clk	38.0878
FBgn0015621	Clp	6.69785
FBgn0039360	CLS	154.009
FBgn0000330	cm	2.93596
FBgn0036365	cmb	109.147
FBgn0040232	cmet	24.9598
FBgn0034988	cN-IIIB	2.13997
FBgn0013765	cnn	345.582
FBgn0036847	CNPYb	1.49875
FBgn0264077	Cnx14D	8.83236
FBgn0015622	Cnx99A	158.513
FBgn0037998	Cog1	23.3653
FBgn0031536	Cog3	2.88593
FBgn0051040	Cog7	2.05722
FBgn0000299	Col4a1	5.43622
FBgn0000346	comt	27.1937
FBgn0039994	conu	2.93
FBgn0029502	COQ7	10.65
FBgn0010434	cora	5.14327
FBgn0261573	CoRest	10.0289
FBgn0025865	Cortactin	34.4138
FBgn0040773	COX7C	26.0307
FBgn0031191	Cp110	75.8988
FBgn0034577	cpa	6.30951
FBgn0011570	cpb	6.23993
FBgn0015623	Cpr	24.5237
FBgn0027873	Cpsf100	7.39884
FBgn0261065	Cpsf73	7.89517
FBgn0051958	CR31958	24.4072
FBgn0058005	CR40005	3.6946
FBgn0036972	CR6434	4.61144
FBgn0025864	Crag	4.46497
FBgn0037440	CRAT	1.83442
FBgn0265784	CrebB	4.60187
FBgn0037102	CRIF	11.6651
FBgn0024811	Crk	23.6599
FBgn0000377	crn	1.00783
FBgn0022213	Cse1	8.49922
FBgn0032346	Csl4	9.93785
FBgn0028838	CSN1a	136.724
FBgn0027057	CSN1b	31.3473
FBgn0027055	CSN3	16.2259
FBgn0027054	CSN4	22.1817
FBgn0027053	CSN5	19.4843
FBgn0028837	CSN6	19.3815
FBgn0028836	CSN7	66.3785
FBgn0261437	CSN8	7.36455
FBgn0004179	Csp	21.629
FBgn0039867	CstF50	3.34746
FBgn0027841	CstF64	3.75072
FBgn0000382	csw	2.41768
FBgn0000384	cta	3.70123
FBgn0020496	CtBP	3.94544
FBgn0039637	Ctl2	54.881
FBgn0011760	ctp	13.6785
FBgn0035205	Ctr9	23.1339
FBgn0260794	ctrip	188.659
FBgn0030521	CtsB1	47.1625
FBgn0015509	Cul1	72.7619
FBgn0032956	Cul2	98.9262
FBgn0261268	Cul3	544.386
FBgn0033260	Cul4	5.53684
FBgn0039632	Cul5	22.9334
FBgn0285955	cv-c	15.5707
FBgn0031452	Cwc25	10.9223
FBgn0023094	cyc	3.66698
FBgn0000405	CycB	82.0983
FBgn0004597	CycC	23.9001
FBgn0010382	CycE	9.13465
FBgn0022936	CycH	6.45329
FBgn0025674	CycK	17.1595
FBgn0025455	CycT	77.5157
FBgn0032378	CycY	7.07681
FBgn0028382	cyp33	3.27396
FBgn0015031	cype	36.7841
FBgn0035141	Cypl	7.99375
FBgn0033900	CysRS-m	274.402
FBgn0264294	Cyt-b5	62.8387
FBgn0086907	Cyt-c-d	1226.31
FBgn0284248	Cyt-c-p	36.8156
FBgn0035600	Cyt-c1	9.60005
FBgn0039651	Cyt-c1L	157.515
FBgn0267821	da	13.8483
FBgn0025641	DAAM	6.90279
FBgn0005677	dac	3.01676
FBgn0263852	Dad1	48.2757
FBgn0023388	Dap160	52.8823
FBgn0015582	dare	2.40236
FBgn0031820	Daxx	13.4216
FBgn0020305	dbe	7.1708
FBgn0040230	dbo	36.8762
FBgn0010220	Dbp45A	3.87791
FBgn0024804	Dbp80	24.9472
FBgn0036534	DCP2	31.4272
FBgn0034246	Dcr-2	8.30094
FBgn0001108	DCTN1-p150	12.9655
FBgn0021825	DCTN2-p50	18.101
FBgn0033206	DCTN4-p62	1.61011
FBgn0040228	DCTN5-p25	20.6575
FBgn0086446	DCTN6-p27	19.5736
FBgn0029067	Dd	4.40005
FBgn0015075	Ddx1	12.4579
FBgn0013799	Deaf1	7.88611
FBgn0028969	deltaCOP	22.1723
FBgn0033716	Den1	101.212
FBgn0030802	DENR	22.9253
FBgn0267972	Der-1	60.8093
FBgn0038438	Der-2	58.1506
FBgn0034072	Dg	12.5667
FBgn0020930	Dgkepsilon	41.3681
FBgn0039710	dgt1	8.12852
FBgn0039638	dgt6	1.22585
FBgn0040212	Dhap-at	3.67985
FBgn0283476	Dhc16F	23.5493
FBgn0013811	Dhc62B	20.6435
FBgn0261797	Dhc64C	3.34683
FBgn0000447	Dhod	336.166
FBgn0033160	Dhx15	22.0225
FBgn0011202	dia	2.70457
FBgn0261397	didum	199.803
FBgn0033447	dila	9.63595
FBgn0031601	Dim1	15.4941
FBgn0035111	Dis3l2	64.9317
FBgn0033885	DJ-1alpha	43.9627
FBgn0039802	dj-1beta	10.6124
FBgn0001624	dlg1	1.95674
FBgn0032363	Dlg5	1.77509
FBgn0030276	Dlic	3.6842
FBgn0041604	dlp	4.57052
FBgn0024510	dlt	3.7856
FBgn0034537	DMAP1	2.87955
FBgn0037443	Dmtn	2.46578
FBgn0035581	Dnah3	46.1713
FBgn0263106	DnaJ-1	116.102
FBgn0262619	DNAlig1	1.78904
FBgn0259676	DNApol-alpha60	2.87913
FBgn0005696	DNApol-alpha73	2.6234
FBgn0263600	DNApol-delta	2.34234
FBgn0035644	DNApol-epsilon58	9.8221
FBgn0037141	DNApol-eta	1.04209
FBgn0037554	DNApol-iota	10.5197
FBgn0038916	dnd	1.04937
FBgn0265998	Doa	6.8317
FBgn0030607	dob	1.40307
FBgn0010583	dock	33.184
FBgn0020306	dom	13.8723
FBgn0267390	dop	16.1993
FBgn0000482	dor	1.27079
FBgn0016794	dos	2.34739
FBgn0011763	Dp	4.19735
FBgn0015929	dpa	10.509
FBgn0037469	Dpck	16.0374
FBgn0036194	Dph1	13.7565
FBgn0024558	Dph5	12.2565
FBgn0002183	dre4	10.3479
FBgn0004638	drk	17.582
FBgn0026479	Drp1	146.368
FBgn0039528	dsd	2.48011
FBgn0000499	dsh	58.6018
FBgn0278608	Dsp1	2.19392
FBgn0033738	DUBAI	135.512
FBgn0250837	dUTPase	15.8044
FBgn0016930	Dyrk2	13.101
FBgn0260003	Dys	2.8973
FBgn0000541	E(bx)	22.0885
FBgn0000581	E(Pc)	13.7906
FBgn0011586	e(r)	8.93644
FBgn0000617	e(y)1	1.87027
FBgn0000618	e(y)2	4.53788
FBgn0000629	E(z)	4.9351
FBgn0011766	E2f1	3.26646
FBgn0024371	E2f2	31.8426
FBgn0033166	Eaf	4.77405
FBgn0035624	Eaf6	21.7718
FBgn0026441	ear	30.7274
FBgn0000536	eas	22.1093
FBgn0027066	Eb1	339.213
FBgn0266572	ebo	5.64529
FBgn0069242	eca	34.6851
FBgn0033879	Echs1	35.7411
FBgn0028436	ECSIT	1.10211
FBgn0260746	Ect3	4.23642
FBgn0036735	Edc3	6.10913
FBgn0023511	Edem1	7.38071
FBgn0032480	Edem2	11.5245
FBgn0027506	EDTP	3.12682
FBgn0000557	eEF1alpha2	2.32565
FBgn0028737	eEF1beta	74.6428
FBgn0032198	eEF1delta	75.2447
FBgn0029176	eEF1gamma	59.229
FBgn0000559	eEF2	93.986
FBgn0051158	Efa6	9.8846
FBgn0011217	eff	540.242
FBgn0029849	Efr	20.6259
FBgn0086908	egg	2.29017
FBgn0086712	Egm	8.73617
FBgn0034180	Ehbp1	23.2843
FBgn0035423	eIF1	428.367
FBgn0261609	eIF2alpha	96.4326
FBgn0039726	eIF2Balpha	3.40402
FBgn0024996	eIF2Bbeta	7.63487
FBgn0034858	eIF2Bdelta	17.9257
FBgn0023512	eIF2Bepsilon	3.60917
FBgn0004926	eIF2beta	161.054
FBgn0034029	eIF2Bgamma	1.9398
FBgn0041588	eIF2D	27.0109
FBgn0263740	eIF2gamma	26.7027
FBgn0037249	eIF3a	66.3399
FBgn0034237	eIF3b	70.7938
FBgn0034258	eIF3c	41.3076
FBgn0040227	eIF3d1	11.462
FBgn0037994	eIF3d2	181.49
FBgn0025582	eIF3e	72.1332
FBgn0037270	eIF3f1	13.9364
FBgn0033069	eIF3f2	65.8537
FBgn0029629	eIF3g1	12.1732
FBgn0038796	eIF3g2	128.138
FBgn0022023	eIF3h	92.6492
FBgn0015834	eIF3i	57.439
FBgn0034654	eIF3k	150.023
FBgn0036258	eIF3l	94.9126
FBgn0033902	eIF3m	99.5376
FBgn0001942	eIF4A	376.803
FBgn0020660	eIF4B	34.5439
FBgn0015218	eIF4E1	180.816
FBgn0265089	eIF4E3	444.719
FBgn0035709	eIF4E4	678.122
FBgn0035823	eIF4E5	633.116
FBgn0039622	eIF4E6	4.35609
FBgn0053100	eIF4EHP	44.3972
FBgn0023213	eIF4G1	5.785
FBgn0260634	eIF4G2	265.716
FBgn0034915	eIF6	64.6751
FBgn0005640	Eip63E	13.1067
FBgn0283649	elgi	33.5219
FBgn0037358	elm	24.6688
FBgn0039066	EloA	13.06
FBgn0023212	EloB	61.0193
FBgn0266711	EloC	65.4703
FBgn0033540	Elp2	2.80822
FBgn0031604	Elp3	2.36095
FBgn0038427	ema	13.1126
FBgn0020497	emb	4.41219
FBgn0000575	emc	2.48915
FBgn0037530	EMC1	85.6792
FBgn0032292	EMC3	84.4334
FBgn0034791	EMC8-9	96.452
FBgn0010435	emp	265.215
FBgn0062440	EMRE	2.48894
FBgn0000578	ena	1.35784
FBgn0038659	EndoA	36.7672
FBgn0061515	endos	517.475
FBgn0000579	Eno	275.591
FBgn0034975	enok	4.81648
FBgn0264672	Eogt	4.05271
FBgn0035060	Eps-15	63.9455
FBgn0027496	epsilonCOP	51.7792
FBgn0036974	eRF1	252.675
FBgn0020443	eRF3	65.7733
FBgn0035909	ergic53	20.8078
FBgn0052703	Erk7	170.242
FBgn0261274	Ero1L	56.213
FBgn0033663	ERp60	323.221
FBgn0033465	Etf-QO	6.9171
FBgn0262740	Evi5	28.3176
FBgn0004583	ex	1.41789
FBgn0037901	Exd2	30.3324
FBgn0266667	Exo70	3.99539
FBgn0266668	Exo84	9.74471
FBgn0000320	eya	13.9422
FBgn0028487	f-cup	305.683
FBgn0016013	Faa	10.4392
FBgn0037913	fabp	214.613
FBgn0005632	faf	2.50304
FBgn0025608	Faf2	41.0648
FBgn0020440	Fak	1.92485
FBgn0034529	FAM21	3.26378
FBgn0038827	Fancd2	1.08508
FBgn0033354	FANCI	2.03986
FBgn0037781	Fancl	7.66099
FBgn0038889	Fancm	28.5461
FBgn0033859	fand	2.21024
FBgn0011205	fbl	26.2547
FBgn0031773	Fbw5	19.0405
FBgn0037760	FBXO11	5.16124
FBgn0035026	Fcp1	1.71112
FBgn0011768	Fdh	24.5308
FBgn0035529	Fdx2	34.3815
FBgn0266268	FeCH	41.4975
FBgn0034542	Fem-1	8.28096
FBgn0030241	feo	30.3509
FBgn0000723	FER	5.86293
FBgn0030449	Fer3HCH	143.252
FBgn0031871	Fgop2	246.625
FBgn0003062	Fib	28.3109
FBgn0036911	Fibp	2.33381
FBgn0263278	Fic	48.8416
FBgn0039694	fig	339.986
FBgn0031611	FIG4	1.32271
FBgn0037255	Fip1	5.05154
FBgn0035498	Fit1	10.9469
FBgn0013954	Fkbp12	79.2005
FBgn0029174	Fkbp59	46.7067
FBgn0000662	fl(2)d	2.00056
FBgn0024555	flfl	24.6361
FBgn0000709	fliI	1.66608
FBgn0024754	Flo1	29.2153
FBgn0264078	Flo2	2.69946
FBgn0260049	flr	5.34677
FBgn0000711	flw	5.38895
FBgn0028734	Fmr1	57.6874
FBgn0035688	fmt	2.25405
FBgn0031633	Fnta	17.6107
FBgn0024236	foi	32.357
FBgn0036134	FoxK	6.78858
FBgn0025373	Fpps	52.5205
FBgn0023083	fray	33.8616
FBgn0042641	frc	1.4422
FBgn0016081	fry	29.5088
FBgn0004656	fs(1)h	2.24694
FBgn0262743	Fs(2)Ket	40.4484
FBgn0004811	fs(2)ltoPP43	23.9335
FBgn0030327	FucT6	3.45284
FBgn0029890	Fum2	186.471
FBgn0036162	Fum3	501.077
FBgn0051874	Fum4	233.894
FBgn0004509	Fur1	4.03891
FBgn0004598	Fur2	1.32582
FBgn0004373	fwd	40.7648
FBgn0024689	fws	13.1801
FBgn0016797	fz2	7.33245
FBgn0011596	fzo	128.273
FBgn0262699	fzr	31.32
FBgn0034937	fzr2	233.567
FBgn0001086	fzy	30.6845
FBgn0001087	g	1.90597
FBgn0029818	GAA1	22.5185
FBgn0260446	GABA-B-R1	1.68492
FBgn0001089	Gal	3.97205
FBgn0036107	galla-2	3.44054
FBgn0001104	Galphai	3.29966
FBgn0001122	Galphao	4.92003
FBgn0004435	Galphaq	19.185
FBgn0001123	Galphas	28.9422
FBgn0028968	gammaCOP	11.4664
FBgn0028552	gammaSnap1	9.99761
FBgn0266721	gammaSnap2	2.35417
FBgn0260639	gammaTub23C	17.2462
FBgn0035879	GAPcenA	4.42704
FBgn0001092	Gapdh2	20.7257
FBgn0000053	Gart	4.35065
FBgn0264560	garz	63.0267
FBgn0031873	Gas41	3.10203
FBgn0029667	Gas8	75.1386
FBgn0033273	Gasz	6.02462
FBgn0260779	GatA	16.6862
FBgn0039153	GatB	2.4392
FBgn0001105	Gbeta13F	42.8391
FBgn0037979	GCC185	11.7842
FBgn0037881	GCC88	6.12745
FBgn0266465	GckIII	48.0046
FBgn0040319	Gclc	13.1759
FBgn0046114	Gclm	99.4747
FBgn0019990	Gcn2	11.6125
FBgn0020388	Gcn5	3.84624
FBgn0030289	GCS1	12.3494
FBgn0027588	GCS2alpha	122.744
FBgn0032643	GCS2beta	11.1638
FBgn0001098	Gdh	14.4023
FBgn0004868	Gdi	43.1287
FBgn0283682	Ge-1	1.42274
FBgn0023081	gek	2.12347
FBgn0036850	Gem2	41.1705
FBgn0011802	Gem3	20.7586
FBgn0039580	Gfat2	19.8184
FBgn0030932	Ggt-1	3.37443
FBgn0005198	gig	3.61288
FBgn0283724	Girdin	3.82
FBgn0033539	Git	2.55309
FBgn0260817	gkt	11.558
FBgn0066114	GlcAT-I	3.57383
FBgn0033316	Gle1	23.151
FBgn0027090	GlnRS	5.2001
FBgn0259139	glo	14.9245
FBgn0283450	Glo1	27.1367
FBgn0261625	GLS	118.123
FBgn0015391	glu	2.13446
FBgn0005674	GluProRS	4.33441
FBgn0264000	GluRIB	1.21859
FBgn0036629	GluRS-m	1.11322
FBgn0264574	Glut1	5.17046
FBgn0015230	Glut3	127.084
FBgn0004507	GlyP	8.72332
FBgn0027088	GlyRS	11.271
FBgn0034697	GM130	8.45826
FBgn0028894	GMF	12.4765
FBgn0004913	Gnf1	43.3578
FBgn0036614	Golgin104	18.87
FBgn0034854	Golgin245	11.2407
FBgn0044871	Gos28	15.8521
FBgn0001124	Got1	513.593
FBgn0001125	Got2	218.522
FBgn0266580	Gp210	2.48599
FBgn0039562	Gp93	48.2007
FBgn0030685	Graf	12.6266
FBgn0036919	Grasp65	15.17
FBgn0026433	Grip128	7.27652
FBgn0026432	Grip163	2.61806
FBgn0032705	Grip71	13.1503
FBgn0026431	Grip75	8.01336
FBgn0001612	Grip91	5.5447
FBgn0001139	gro	20.5744
FBgn0261278	grp	15.004
FBgn0040493	grsm	349.05
FBgn0035416	gry	6.66202
FBgn0001145	Gs2	7.39306
FBgn0037696	GstZ1	1.05548
FBgn0010391	Gtp-bp	13.958
FBgn0031905	gudu	166.072
FBgn0010825	Gug	4.55174
FBgn0026238	gus	1.35199
FBgn0051992	gw	19.2612
FBgn0260399	gwl	12.0241
FBgn0039936	Gyf	17.1388
FBgn0032394	Hacd1	10.9508
FBgn0032812	Hakai	3.36574
FBgn0037376	Hat1	115.832
FBgn0001179	hay	2.73537
FBgn0042712	HBS1	31.3573
FBgn0039904	Hcf	16.3118
FBgn0037332	Hcs	4.00687
FBgn0015805	HDAC1	3.01629
FBgn0041210	HDAC4	2.04497
FBgn0051320	HEATR2	51.9471
FBgn0014189	Hel25E	6.45806
FBgn0011771	Hem	1.83782
FBgn0031817	HemK1	131.315
FBgn0033686	Hen1	26.6323
FBgn0011224	heph	82.7867
FBgn0031107	HERC2	5.90386
FBgn0035207	Herc4	72.6977
FBgn0031950	Herp	87.7731
FBgn0001186	Hex-A	2.04911
FBgn0042711	Hex-t1	60.8337
FBgn0042710	Hex-t2	639.839
FBgn0038251	Hexim	41.8592
FBgn0028577	hfp	3.25794
FBgn0029676	HIP-R	59.493
FBgn0036309	Hip1	27.1601
FBgn0259824	Hip14	1.06668
FBgn0037027	HIPP1	6.97441
FBgn0022786	Hira	6.3459
FBgn0027087	HisRS	9.60877
FBgn0026582	Hmg-2	1.53372
FBgn0263782	Hmgcr	51.4624
FBgn0010611	Hmgs	13.3334
FBgn0038376	Hmt-1	17.6452
FBgn0015737	Hmu	9.27306
FBgn0267791	HnRNP-K	40.399
FBgn0037933	Ho	90.2487
FBgn0015393	hoip	4.98639
FBgn0032250	holn1	7.45098
FBgn0001202	hook	11.4256
FBgn0004864	hop	3.38826
FBgn0264491	how	3.43704
FBgn0264785	Hph	20.9477
FBgn0261456	hpo	3.84274
FBgn0037382	Hpr1	9.11697
FBgn0033973	HPS1	9.47324
FBgn0034261	HPS4	3.02031
FBgn0004838	Hrb27C	64.6468
FBgn0004237	Hrb87F	50.4875
FBgn0001215	Hrb98DE	476.252
FBgn0028475	Hrd3	131.628
FBgn0015949	hrg	8.73925
FBgn0031450	Hrs	18.8297
FBgn0024230	Hs2st	10.2682
FBgn0263606	Hsc20	6.84285
FBgn0001216	Hsc70-1	299.635
FBgn0001217	Hsc70-2	721.485
FBgn0001218	Hsc70-3	70.4331
FBgn0266599	Hsc70-4	730.524
FBgn0001220	Hsc70-5	340.468
FBgn0026418	Hsc70Cb	63.1774
FBgn0033087	Hsepi	3.18796
FBgn0001222	Hsf	12.846
FBgn0034491	Hsl	29.0011
FBgn0001224	Hsp23	100.319
FBgn0015245	Hsp60A	210.043
FBgn0011244	Hsp60B	1126.66
FBgn0031728	Hsp60C	1720.85
FBgn0032525	Hsp60D	350.135
FBgn0001230	Hsp68	52.3018
FBgn0001233	Hsp83	726.934
FBgn0263025	HSPBAP1	1.48948
FBgn0061198	HSPC300	61.3365
FBgn0010389	htl	2.44154
FBgn0033382	Hydr1	211.679
FBgn0037657	hyx	8.11162
FBgn0028429	I-2	94.4955
FBgn0037050	ICA69	22.8892
FBgn0041147	ida	8.19759
FBgn0001248	Idh	234.139
FBgn0038922	Idh3b	460.502
FBgn0001250	if	1.60819
FBgn0001941	ifc	15.7658
FBgn0024222	IKKbeta	2.41737
FBgn0027086	IleRS	4.07203
FBgn0028427	Ilk	6.10987
FBgn0035227	Iml1	1.04348
FBgn0025394	inc	1.17976
FBgn0032516	Ing5	56.0479
FBgn0086613	Ino80	8.16292
FBgn0025885	Inos	97.3712
FBgn0036273	INPP5E	9.41016
FBgn0283499	InR	1.81511
FBgn0034964	IntS1	15.4755
FBgn0035462	IntS10	2.70805
FBgn0039459	IntS12	3.10572
FBgn0031314	IntS14	1.59643
FBgn0030858	IntS2	3.82405
FBgn0262117	IntS3	3.65268
FBgn0261383	IntS6	3.71094
FBgn0086359	Invadolysin	7.50558
FBgn0025366	Ip259	20.6879
FBgn0032147	IP3K1	5.73565
FBgn0031267	Ipk2	1.52378
FBgn0036053	iPLA2-VIA	9.23876
FBgn0016672	Ipp	5.39854
FBgn0011774	Irbp	1.77359
FBgn0024958	Irp-1A	9.65812
FBgn0024957	Irp-1B	4.36248
FBgn0037637	IscU	91.6861
FBgn0028372	isopeptidase-T-3	210.485
FBgn0011604	Iswi	53.952
FBgn0040308	Jafrac2	242.132
FBgn0037374	jagn	12.958
FBgn0001280	janA	332.042
FBgn0011225	jar	286.681
FBgn0032671	JMJD4	19.0826
FBgn0266282	jnj	83.6462
FBgn0032704	Jwa	10.9686
FBgn0027596	Kank	151.303
FBgn0024889	Kap-alpha1	105.114
FBgn0028421	Kap3	1.42877
FBgn0040513	kappaB-Ras	6.56538
FBgn0087013	Karybeta3	217.255
FBgn0040208	Kat60	7.76782
FBgn0040207	kat80	1.47476
FBgn0261794	kcc	3.10628
FBgn0267330	KdelR	44.4128
FBgn0037659	Kdm2	2.261
FBgn0033233	Kdm4A	21.7829
FBgn0053182	Kdm4B	65.9845
FBgn0261955	kdn	55.6693
FBgn0001301	kel	7.36438
FBgn0010504	kermit	370.181
FBgn0001308	Khc	6.2408
FBgn0019968	Khc-73	25.2245
FBgn0267432	kl-3	6.65312
FBgn0010235	Klc	19.5181
FBgn0030268	Klp10A	132.315
FBgn0032243	Klp31E	1.66749
FBgn0034824	Klp59C	495.363
FBgn0034827	Klp59D	272.414
FBgn0004378	Klp61F	3.88426
FBgn0004380	Klp64D	2.51267
FBgn0004379	Klp67A	41.9612
FBgn0004387	Klp98A	10.0633
FBgn0026063	KP78b	36.599
FBgn0266449	Kr-h2	112.431
FBgn0250753	kra	539.651
FBgn0020647	KrT95D	53.8302
FBgn0015402	ksr	12.2161
FBgn0001324	kto	65.5884
FBgn0032850	Kua	17.3834
FBgn0259984	kuz	3.82877
FBgn0001491	l(1)10Bb	61.0547
FBgn0027334	l(1)G0004	3.25117
FBgn0026713	l(1)G0007	4.05608
FBgn0027291	l(1)G0156	8.01736
FBgn0027279	l(1)G0196	30.908
FBgn0028327	l(1)G0320	33.4274
FBgn0284251	l(2)05287	19.4356
FBgn0086444	l(2)37Cb	2.28836
FBgn0002031	l(2)37Cc	196.005
FBgn0262123	l(2)41Ab	74.4008
FBgn0002121	l(2)gl	5.35711
FBgn0022153	l(2)k05819	6.45252
FBgn0086451	l(2)k09022	1.85724
FBgn0021856	l(2)k14505	10.73
FBgn0021847	l(2)k14710	15.6809
FBgn0011297	l(2)not	20.1385
FBgn0010830	l(3)04053	2.79662
FBgn0010926	l(3)07882	1.789
FBgn0263599	l(3)72Ab	3.87852
FBgn0263607	l(3)72Dp	1.35612
FBgn0263608	l(3)72Dr	5.61575
FBgn0002283	l(3)73Ah	37.9079
FBgn0260655	l(3)76BDm	9.60161
FBgn0002524	lace	3.23679
FBgn0002525	Lam	27.8657
FBgn0016031	lama	2.03181
FBgn0010397	LamC	5.81927
FBgn0032949	Lamp1	104.752
FBgn0261800	LanB1	1.92417
FBgn0267348	LanB2	1.22078
FBgn0086372	lap	12.1644
FBgn0000464	Lar	1.95527
FBgn0035424	Larp4B	72.6299
FBgn0029158	Las	72.9526
FBgn0026634	ldlCp	14.603
FBgn0284252	Letm1	122.201
FBgn0284253	LeuRS	3.53729
FBgn0025692	Lfg	2.96154
FBgn0041111	lilli	29.0622
FBgn0046704	Liprin-alpha	18.7941
FBgn0036376	Liprin-beta	16.4897
FBgn0015754	Lis-1	4.03291
FBgn0017581	Lk6	28.6358
FBgn0038167	Lkb1	164.298
FBgn0085470	lmgB	257.473
FBgn0028717	Lnk	4.9935
FBgn0033309	Lnpk	116.872
FBgn0083946	lobo	85.9
FBgn0061492	loj	5.58883
FBgn0036892	Lon	117.897
FBgn0032515	loqs	253.839
FBgn0263593	Lpin	94.5241
FBgn0066101	LpR1	1.7637
FBgn0051092	LpR2	3.09348
FBgn0028582	lqf	152.933
FBgn0010398	Lrr47	6.68557
FBgn0034834	LS2	14.2518
FBgn0067622	LSm-4	16.6773
FBgn0261067	LSm1	3.19097
FBgn0030364	Lsm12	5.36908
FBgn0051184	LSm3	2.97764
FBgn0261068	LSm7	6.28563
FBgn0260940	lsn	8.70097
FBgn0264691	Lst8	1.37001
FBgn0002566	lt	13.1505
FBgn0262517	Ltn1	13.9131
FBgn0027525	LTV1	5.99961
FBgn0262871	lute	5.19473
FBgn0010602	lwr	36.3072
FBgn0027084	LysRS	5.5695
FBgn0011648	Mad	13.1768
FBgn0026326	Mad1	1.72511
FBgn0035640	mad2	24.8869
FBgn0027497	Madm	7.29284
FBgn0016034	mael	24.4091
FBgn0267861	Maf1	8.24008
FBgn0037481	MAGE	8.75851
FBgn0002736	mago	2.6544
FBgn0034962	MAN1	78.3649
FBgn0027095	Manf	52.825
FBgn0013987	MAPk-Ak2	5.23291
FBgn0033451	Marc	3.31846
FBgn0031655	Marcal1	5.59745
FBgn0029870	Marf	44.9175
FBgn0024956	Mat1	4.26848
FBgn0261286	Mat89Ba	4.26887
FBgn0038965	mats	35.6789
FBgn0015513	mbc	1.37325
FBgn0027950	MBD-like	46.0952
FBgn0038016	MBD-R2	27.8565
FBgn0262732	mbf1	107.452
FBgn0265487	mbl	3.49355
FBgn0026207	mbo	17.0255
FBgn0005536	Mbs	31.7617
FBgn0039877	Mccc1	3.26144
FBgn0042083	Mccc2	2.60188
FBgn0014861	Mcm2	4.12916
FBgn0017577	Mcm5	1.32714
FBgn0025815	Mcm6	5.99758
FBgn0020633	Mcm7	5.21557
FBgn0260959	MCPH1	523.433
FBgn0029833	MCTS1	7.59978
FBgn0042185	MCU	48.4243
FBgn0262782	Mdh1	17.1624
FBgn0262559	Mdh2	15.8156
FBgn0004419	me31B	82.0042
FBgn0030993	Mec2	1.57718
FBgn0011655	Med	2.08772
FBgn0037109	MED1	10.8189
[truncated: 1,376 more rows]
